# Supplementary material for: Highly stereoselective cyclopropanation of diazo Weinreb amides catalyzed by chiral Ru(ii)–Amm–Pheox complexes
Source: Royal Society of Chemistry journal article supplement (doi:10.1039/c6cc02498j), 2016-01-01
Supplement: c6cc02498j1.pdf [file c6cc02498j1.pdf]

## Supporting Information

### Highly Stereoselective Cyclopropanation of Diazo Weinreb Amides Catalyzed by Chiral Ru(II)-*Amm*-Pheox Complexes

Soda Chanthamath,\* Hamada S. A. Mandour, Tong Thi Minh Thu, Kazutaka Shibatomi and Seiji Iwasa\*  
*Department of Environmental and Life Sciences, Toyohashi University of Technology, 1-1 Tempaku-cho,  
Toyohashi, Aichi 441-8580, JAPAN*

#### CONTENTS:

|                                                                                                |    |
|------------------------------------------------------------------------------------------------|----|
| 1. Synthesis of various diazo Weinreb amides.....                                              | 2  |
| 2. Synthesis of Ru(II)-Pheox complexes .....                                                   | 4  |
| 3. Synthesis of Ru(II)- <i>Amm</i> -Pheox complexes.....                                       | 8  |
| 4. General procedure for asymmetric cyclopropanation of diazo Weinreb amides with olefins..... | 13 |
| 5. Analytical data for asymmetric cyclopropanation reaction products.....                      | 13 |
| 6. Synthetic transformations of cyclopropyl Weinreb amides.....                                | 19 |
| 7. NMR Spectral data.....                                                                      | 22 |
| 8. HPLC Spectral data.....                                                                     | 54 |

**General:** All reactions were performed under an atmosphere of argon unless otherwise noted. Dichloromethane ( $\text{CH}_2\text{Cl}_2$ ) was purchased from Kanto Chemical Co., Inc.. Acetonitrile was purchased from Wako Pure Chemical Industries, Ltd.. All reactions were monitored by thin layer chromatography (TLC), glass plates pre-coated with silica gel Merck KGaA 60 F<sub>254</sub>, layer thickness 0.2 mm. All the starting materials are commercially available and were used after purification. The products were visualized by irradiation with UV light or by treatment with a solution of phosphomolybdic acid or by treatment with a solution of *p*-anisaldehyde. Flash column chromatography was performed using silica gel (Merck, Art. No.7734). <sup>1</sup>H NMR (500 MHz, 400 MHz) and <sup>13</sup>C NMR (500 MHz, 400 MHz) spectra were recorded on JEOL JNM-ECX500, JEOL JNM-ECS400 spectrometer. Chemical shifts are reported as  $\delta$  values (ppm) relative to  $\text{CDCl}_3$  (7.26 ppm). Elemental analyses were measured on a Yanaco CHN CORDER MT-6. Optical rotations were performed with a JASCO P-1030 polarimeter at the sodium D line (1.0 ml sample cell). DART mass (positive mode) analyses were performed on a LC-TOF JMS-T100LP.

## 1. Synthesis of various diazo Weinreb amides

### *N*-Methoxy-*N*-methyldiazoacetamide (MMD) (**2a**)

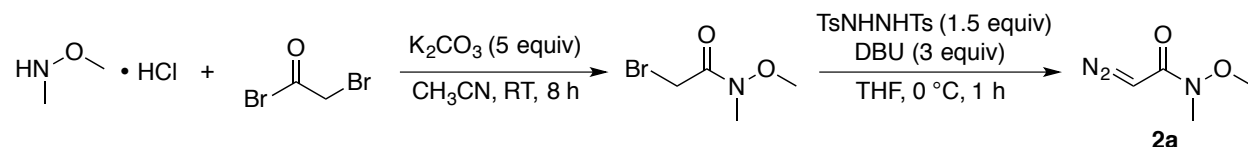

According to Fukuyama method,<sup>1</sup> to a solution of *N*,*O*-dimethylhydroxylamine hydrochloride (100.0 mg, 1 mmol) and potassium carbonate (708.3 mg, 5 mmol) in acetonitrile, bromoacetyl bromide (88.8  $\mu\text{L}$ , 1 mmol) was added drop wise with stirring at room temperature. The reaction mixture was stirred for 8 h. The progress of the reaction was monitored by TLC. After the reaction was completed, the reaction mixture was concentrated under reduced pressure and extracted with water and methylene chloride. The organic layer was dried over  $\text{Na}_2\text{SO}_4$ , and concentrated. The residue was dissolved in THF and *N*,*N*-ditosylhydrazine (TsNHNHTs) (520.2 mg, 1.5 mmol) was added then DBU (456  $\mu\text{L}$ , 3 mmol) was added drop wise at 0 °C. The reaction mixture was stirred until the reaction was finished. The progress of the reaction was monitored by TLC. After the reaction was completed within 1 h, the reaction was quenched using saturated soln. of  $\text{NaHCO}_3$  then reaction mixture was extracted with water and diethyl ether. The organic layer was dried over  $\text{Na}_2\text{SO}_4$  and concentrated. The residue was purified by flash column chromatography with a mixture of (*n*-Hexane/EtOAc) (2/1 (v/v)) to give the corresponding diazo Weinreb amide **2a** (49% yield) as yellow liquid.  $^1\text{H}$  NMR (500 MHz,  $\text{CDCl}_3$ )  $\delta$  3.15 (s, 3H), 3.64 (s, 3H), 5.32 (s, 1H) ppm.  $^{13}\text{C}$  NMR (125 MHz,  $\text{CDCl}_3$ )  $\delta$  33.36, 46.40, 61.56, 168.39 ppm. IR (neat)  $\nu$  2359, 2341, 2108, 1623  $\text{cm}^{-1}$ . HRMS (DART) calcd for  $\text{C}_4\text{H}_7\text{N}_3\text{O}_2$   $[\text{M}+\text{NH}_4]^+$ : 147.0882 found: 147.0885.

### *N*-Benzyl-*N*-methoxydiazoacetamide (BMD) (**2b**)

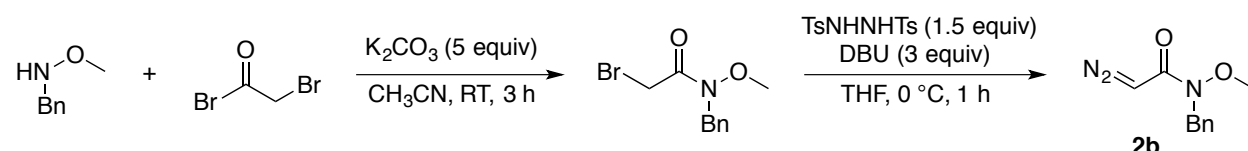

According to Fukuyama method,<sup>1</sup> in a 50 mL two neck flask a mixture of *N*-benzyl-*O*-methylhydroxylamine (66 mg, 0.48 mmol) and  $\text{K}_2\text{CO}_3$  (332.5 mg, 2.4 mmol) were dissolved in 15 mL of dry  $\text{CH}_3\text{CN}$ . Then from the side arm of the flask bromoacetyl bromide (41.5  $\mu\text{L}$ , 0.48 mmol) was added and the reaction mixture was stirred for 3 h at room temperature. The progress of the reaction was monitored by TLC and  $^1\text{H}$  NMR. After the reaction was completed, the reaction mixture was concentrated under reduced pressure and extracted with water and methylene chloride. The organic layer was dried



over Na<sub>2</sub>SO<sub>4</sub>, and concentrated. The residue was dissolved in THF and *N,N*-ditosylhydrazine (TsNHNHTs) (245 mg, 0.7 mmol) was added then DBU (215  $\mu$ L, 1.44 mmol) was added drop wise at 0 °C. The reaction mixture was stirred until the reaction was finished. The progress of the reaction was monitored by TLC. After the reaction was completed within 1 h, the reaction was quenched using saturated soln. of NaHCO<sub>3</sub> then reaction mixture was extracted with water and diethyl ether. The organic layer was dried over Na<sub>2</sub>SO<sub>4</sub>, and concentrated. The residue was purified by flash column chromatography with a mixture of (*n*-Hexane/EtOAc) (9/1 (v/v)) to give the corresponding diazo Weinreb amide **2b** (44% yield) as yellow liquid. <sup>1</sup>H NMR (400 MHz, CDCl<sub>3</sub>)  $\delta$  3.55 (s, 3H), 4.73 (s, 2H), 5.32 (s, 1H), 7.10-7.12 (m, 5H) ppm. <sup>13</sup>C NMR (100 MHz, CDCl<sub>3</sub>)  $\delta$  46.75, 50.43, 62.58, 127.82, 128.49, 128.64, 136.47, 168.49 ppm. IR (neat)  $\nu$  2395, 2341, 2108, 1622 cm<sup>-1</sup>. HRMS (DART) calcd for C<sub>10</sub>H<sub>11</sub>N<sub>3</sub>O<sub>2</sub> [M+NH<sub>4</sub>]<sup>+</sup>: 223.1195 found: 223.1192.

#### *N*-Acetoxy-*N*-methyldiazoacetamide (AMD) (**2c**)

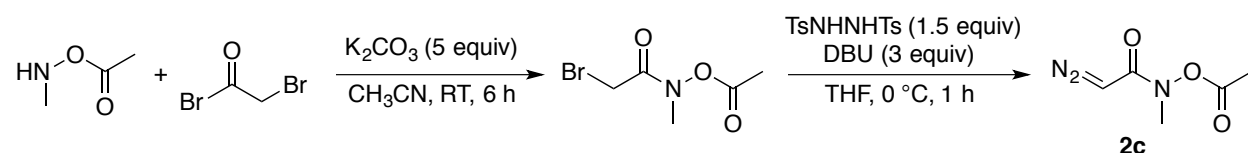

According to Fukuyama method,<sup>1</sup> to a solution of *O*-acetyl-*N*-methyl hydroxylamine (100 mg, 0.79 mmol) and potassium carbonate (550 mg, 3.94 mmol) in 20 mL of dry acetonitrile then bromoacetyl bromide (47  $\mu$ L, 0.79 mmol) was added dropwise at room temperature. The reaction mixture was stirred for 6 h. The reaction was monitored by TLC and <sup>1</sup>H NMR. After the reaction was completed, the reaction mixture was evaporated and extracted with water and dichloromethane. The organic layer was dried over Na<sub>2</sub>SO<sub>4</sub>, and concentrated. Then the residue was dissolved in THF and ditosylhydrazine (TsNHNHTs) (403 mg, 1.2 mmol) was added. After that DBU (354  $\mu$ L, 2.38 mmol) was added drop wise at 0 °C. The reaction mixture was stirred until the reaction was finished. The progress of the reaction was monitored by TLC. After the reaction was completed within 1 h, saturated solution of NaHCO<sub>3</sub> was added to quench the reaction and the mixture was extracted with water and diethyl ether. The organic layer was dried over Na<sub>2</sub>SO<sub>4</sub>, and concentrated. The residue was purified by flash column chromatography with a mixture of (*n*-Hexane/EtOAc) (3/1 (v/v)) to give the corresponding diazo Weinreb amide **2c** (46% yield) as yellow liquid. <sup>1</sup>H NMR (500 MHz, CDCl<sub>3</sub>)  $\delta$  2.18 (s, 3H), 3.26 (s, 3H), 4.99 (s, 1H) ppm. <sup>13</sup>C NMR (125 MHz, CDCl<sub>3</sub>)  $\delta$  18.65, 36.47, 46.99, 167.760, 168.02 ppm. IR (neat)  $\nu$  2359, 2341, 2113, 1796, 1682, 1643 cm<sup>-1</sup>. HRMS (DART) calcd for C<sub>5</sub>H<sub>7</sub>N<sub>3</sub>O<sub>3</sub> [M+NH<sub>4</sub>]<sup>+</sup>: 175.0831 found: 175.0833.

## 2. Synthesis of Ru(II)-Pheox complexes

### Ru(II)-Pheox (3b)

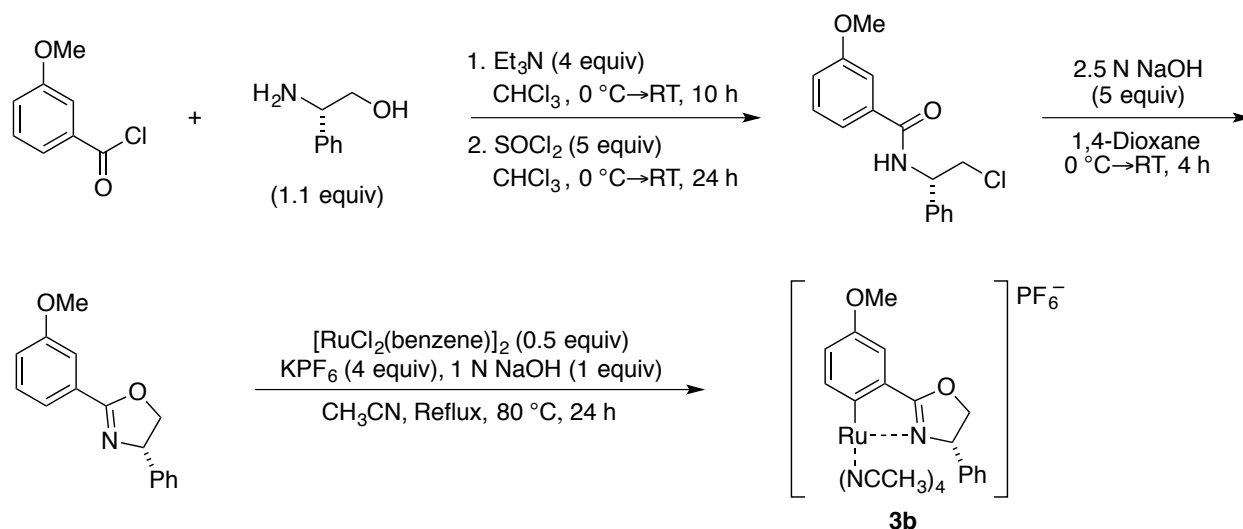

To a mixture of (*S*)-(+)-2-phenylglycinol (300.0 mg, 2.18 mmol) and Et<sub>3</sub>N (1.2 mL, 8.72 mmol) in CHCl<sub>3</sub> (7 mL), a solution of 3-methoxybenzoyl chloride (339.0 mg, 1.98 mmol) in CHCl<sub>3</sub> (4 mL) was added dropwise with magnetic stirring at 0 °C. After the stirring for 10 h at room temperature, the reaction mixture was concentrated under reduced pressure. The residue was dissolved in CHCl<sub>3</sub> (12 mL) and treated with SOCl<sub>2</sub> (0.7 mL, 9.94 mmol) at 0 °C. After stirring for 24 h at room temperature, the solvent and excess SOCl<sub>2</sub> were removed under reduced pressure. Sat. NaHCO<sub>3</sub> (aq.) (30 mL) was added to the residue with stirring for 5 min. The organic product was extracted with CH<sub>2</sub>Cl<sub>2</sub> (3 × 25 mL), dried over anhydrous Na<sub>2</sub>SO<sub>4</sub> and concentrated under reduced pressure. By using a sonicator, the solid residue was dissolved in 1,4-dioxane (10 mL) and 2.5 N NaOH (aq.) (316.8 mg, 7.9 mmol) was added slowly at 0 °C, then the reaction mixture was stirred for 4 h at room temperature. The solvent was removed under vacuum, followed by addition of water (25 mL) and CH<sub>2</sub>Cl<sub>2</sub> (3 × 25 mL) for extraction. The solvent was evaporated under vacuum to afford (*S*)-2-(3-methoxyphenyl)-4-phenyl-4,5-dihydrooxazole ligand (87% yield).  $[\alpha]_D^{28} = -34.6$  (c 1.00, CHCl<sub>3</sub>), <sup>1</sup>H NMR (125 MHz, CDCl<sub>3</sub>) δ 3.84 (s, 3H), 4.26 (t, *J* = 16.8 Hz, 1H), 4.78 (t, *J* = 18.7 Hz, 1H) 5.38 (t, *J* = 17.9 Hz, 1H), 7.06 (dd, *J* = 1.91, 10.3 Hz, 1H), 7.25-7.37 (m, 6H), 7.62 (s, 1H), 7.64 (d, *J* = 7.6 Hz, 1H). <sup>13</sup>C NMR (125 MHz, CDCl<sub>3</sub>) δ 55.54, 70.25, 75.30, 112.87, 118.49, 121.06, 126.88, 127.77, 128.89, 129.57, 142.45, 159.64, 164.79 ppm. IR (neat) 3019, 2963, 1603, 1478 cm<sup>-1</sup>, HRMS (DART) calcd for C<sub>16</sub>H<sub>15</sub>NO<sub>2</sub> [M+H]<sup>+</sup>: 254.1181 found: 254.1186.

A two necked round bottom flask (100 mL) fitted with a magnetic stirring bar and a reflux condenser was charged with (*S*)-2-(3-methoxyphenyl)-4-phenyl-4,5-dihydrooxazole (300.0 mg, 1.18 mmol), [RuCl<sub>2</sub>(benzene)]<sub>2</sub> (2.59 mg, 0.59 mmol), and KPF<sub>6</sub> (871.7 mg, 4.7 mmol). The reaction flask was

evacuated and backfilled with argon. Through the side arm CH<sub>3</sub>CN (20 mL, degassed) and NaOH (aq.) (47.2 mg, 1.18 mmol) were injected. The suspended reaction mixture was refluxed for 24 h at 80 °C. The solvent was removed under reduced pressure and the residue was purified by silica gel column chromatography with CH<sub>3</sub>CN/CH<sub>2</sub>Cl<sub>2</sub> (1/10 (v/v)) to give the desired complex **3b** (67% yield) as a green solid. <sup>1</sup>H NMR (500 MHz, CD<sub>3</sub>CN) δ 1.99 (s, 3H), 2.11 (s, 3H), 2.13 (s, 3H) 2.40 (s, 3H), 3.76 (s, 3H, CH<sub>3</sub>CN), 4.49 (t, *J* = 8.0 Hz, 1H), 5.09 (t, *J* = 8.0 Hz, 2H), 6.84 (d, *J* = 10.7 Hz, 1H), 7.09 (d, *J* = 2.7 Hz, 1H), 7.31-7.41 (m, 5H), 7.70 (d, *J* = 7.6 Hz, 1H). <sup>13</sup>C NMR (125 MHz, CD<sub>3</sub>CN) δ 0.88, 3.04, 3.13, 3.38, 54.98, 68.22, 78.05, 110.42, 121.27, 121.51, 122.49, 128.09, 128.13, 134.44, 138.60, 141.47, 155.31, 174.07, 174.89 ppm.

### Ru(II)-Pheox (**3c**)

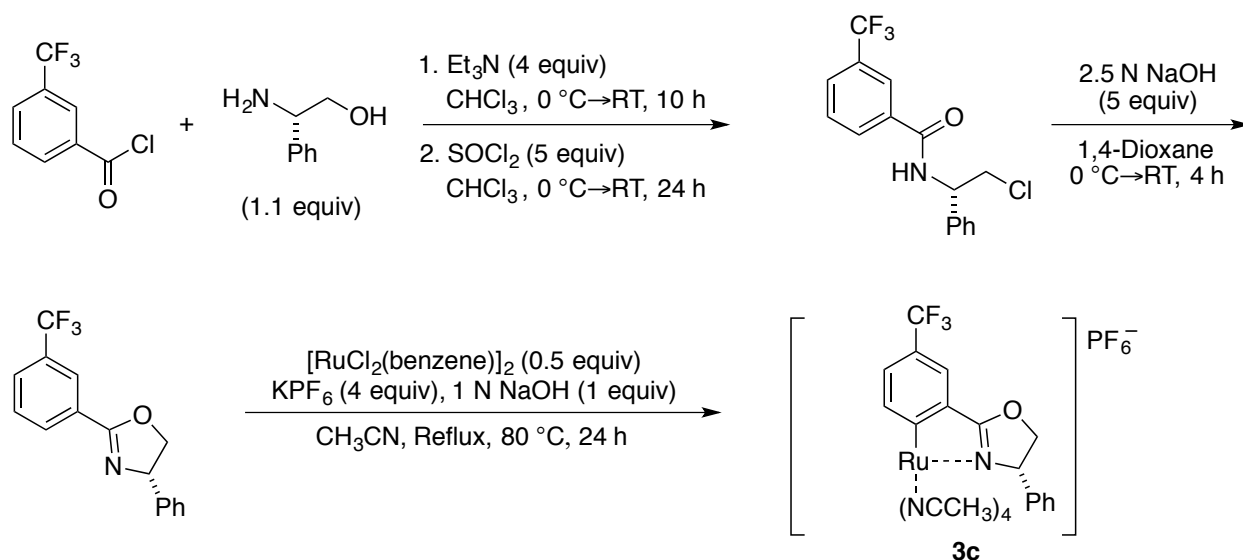

To a mixture of (*S*)-(+)-2-phenylglycinol (244.0 mg, 1.78 mmol) and Et<sub>3</sub>N (0.9 mL, 6.46 mmol) in CHCl<sub>3</sub> (7 mL), a solution of 3-(trifluoromethyl)benzoyl chloride (333.0 mg, 1.6 mmol) in CHCl<sub>3</sub> (4 mL) was added drop wise with magnetic stirring at 0 °C. After the stirring for 10 h at room temperature, the reaction mixture was concentrated under reduced pressure. The residue was dissolved in CHCl<sub>3</sub> (12.0 mL) and treated with SOCl<sub>2</sub> (0.58 mL, 8 mmol) at 0 °C. After stirring for 24 h at room temperature, the solvent and excess SOCl<sub>2</sub> were removed under reduced pressure. Sat. NaHCO<sub>3</sub> (aq.) (30 mL) was added to the residue with stirring for 5 min. the organic product was extracted with CH<sub>2</sub>Cl<sub>2</sub> (3 × 25 mL), dried over anhydrous Na<sub>2</sub>SO<sub>4</sub>, and concentrated under reduced pressure. By using a sonicator, the solid residue was dissolved in 1,4-dioxane (10 mL) and 2.5 N NaOH (aq.) (256.0 mg, 6.4 mmol) was added slowly at 0 °C, then the reaction mixture was stirred for 4 h at room temperature. The solvent was removed under

vacuum, followed by addition of water (25 mL) and CH<sub>2</sub>Cl<sub>2</sub> (3 x 25 mL) for extraction. The solvent was evaporated under vacuum to afford (*S*)-4-phenyl-2-(3-(trifluoromethyl)phenyl)-4,5-dihydrooxazole ligand (59% yield).  $[\alpha]_D^{28} = -43.6$  (c 1.00, CHCl<sub>3</sub>), <sup>1</sup>H NMR (500 MHz, CDCl<sub>3</sub>) δ 4.32 (t, *J* = 16.8 Hz, 1H), 4.83 (t, *J* = 18.7 Hz, 1H), 5.42 (t, *J* = 18.7 Hz, 1H), 7.29-7.39 (m, 5H), 7.56 (t, *J* = 15.8 Hz, 1H), 7.76 (d, *J* = 8.0 Hz, 1H), 8.24 (d, *J* = 7.6 Hz, 1H), 8.35 (s, 1H). <sup>13</sup>C NMR (125 MHz, CDCl<sub>3</sub>) δ 70.33, 75.23, 125.54, 126.83, 127.92, 128.15, 128.55, 128.96, 129.11, 130.97, 131.23, 131.76, 142.00, 163.58 ppm. IR (neat) 3072, 2981, 1674 cm<sup>-1</sup>. HRMS (DART) calcd for C<sub>15</sub>H<sub>12</sub>N<sub>2</sub>O<sub>3</sub> [M+H]<sup>+</sup>: 292.0949 found: 292.0943.

A two necked round bottom flask (100.0 mL) fitted with a magnetic stirring bar and a reflux condenser was charged with the (*S*)-4-phenyl-2-(3-(trifluoromethyl)phenyl)-4,5-dihydrooxazole ligand (200 mg, 0.67 mmol), [RuCl<sub>2</sub>(benzene)]<sub>2</sub> (171.7 mg, 0.34 mmol), and KPF<sub>6</sub> (493.1 mg, 2.68 mmol). The reaction flask was evacuated and backfilled with argon. Through the side arm CH<sub>3</sub>CN (20 mL, degassed) and NaOH (aq.) (26.8 mg, 0.67 mmol) were injected. The suspended reaction mixture was refluxed for 24 h at 80 °C. The solvent was removed under reduced pressure and the residue was purified by silica gel column chromatography with CH<sub>3</sub>CN/CH<sub>2</sub>Cl<sub>2</sub> (1/20 (v/v)) to give the desired complex **3c** (43% yield) as a faint green solid. <sup>1</sup>H NMR (500 MHz, CD<sub>3</sub>CN) δ 1.93 (s, 3H), 1.99 (s, 3H), 2.11 (s, 3H), 2.42 (s, 3H), 4.53 (t, *J* = 5.4 Hz, 1H), 5.12 (d, *J* = 8.5 Hz, 2H), 7.34-7.42 (m, 6H), 7.65 (d, *J* = 5.5 Hz, 1H), 8.09 (d, *J* = 8.0 Hz, 1H). <sup>13</sup>C NMR (125 MHz, CD<sub>3</sub>CN) δ 0.86, 2.82, 2.98, 3.32, 68.24, 78.38, 121.72, 121.80, 122.04, 124.10, 124.49, 128.16, 128.30, 135.58, 139.15, 141.03, 174.27, 197.19 ppm. IR (neat) ν 2964, 2293, 1641, 1473 cm<sup>-1</sup>.

### Ru(II)-Pheox (**3d**)

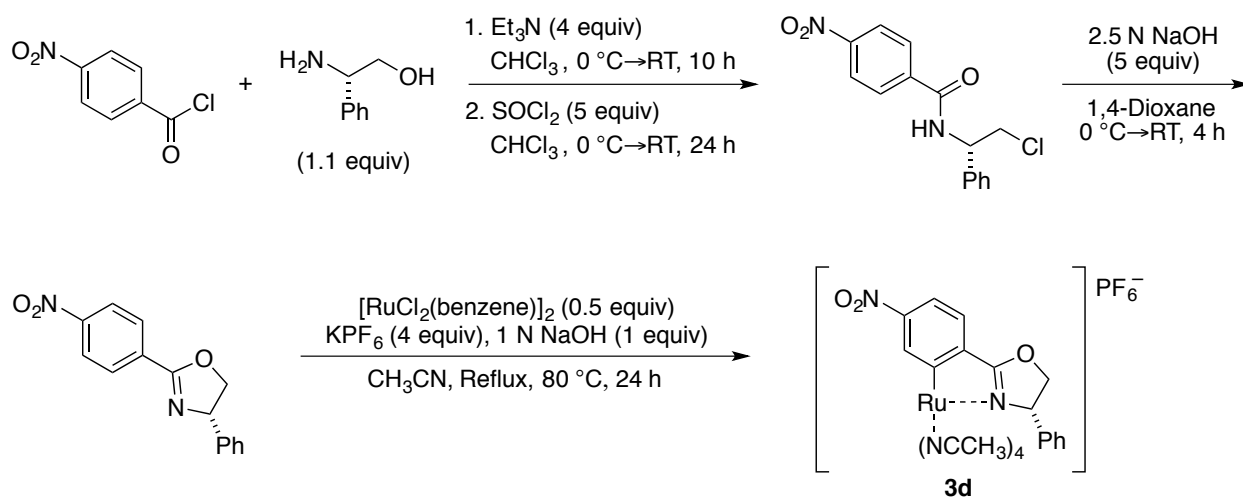

To a mixture of (*S*)-(+)-2-phenylglycinol (244.0 mg, 1.78 mmol) and Et<sub>3</sub>N (0.9 mL, 6.4 mmol) in CHCl<sub>3</sub> (7 mL), a solution of 4-nitrobenzoyl chloride (296.0 mg, 1.6 mmol) in CHCl<sub>3</sub> (4 mL) was added drop

wise with magnetic stirring at 0 °C. After the stirring for 10 h at room temperature, the reaction mixture was concentrated under reduced pressure. The residue was dissolved in  $\text{CHCl}_3$  (12 mL) and treated with  $\text{SOCl}_2$  (0.58 mL, 8 mmol) at 0 °C. After stirring for 24 h at room temperature, the solvent and excess  $\text{SOCl}_2$  were removed under reduced pressure. Sat.  $\text{NaHCO}_3$  (aq.) (30 mL) was added to the residue with stirring for 5 min. the organic product was extracted with  $\text{CH}_2\text{Cl}_2$  ( $3 \times 25$  mL), dried over anhydrous  $\text{Na}_2\text{SO}_4$ , and concentrated under reduced pressure. By using a sonicator, the solid residue was dissolved in 1,4-dioxane (10 mL) and 2.5 N  $\text{NaOH}$  (aq.) (256 mg, 6.4 mmol) was added slowly at 0 °C, then the reaction mixture was stirred for 4 h at room temperature. The solvent was removed under vacuum, followed by addition of water (25 mL) and  $\text{CH}_2\text{Cl}_2$  ( $3 \times 25$  mL) for extraction. The solvent was evaporated under vacuum to afford (*S*)-2-(4-nitrophenyl)-4-phenyl-4,5-dihydrooxazole ligand (62% yield).  $[\alpha]_D^{27} = -72.5$  (c 1.00,  $\text{CHCl}_3$ ),  $^1\text{H}$  NMR (500 MHz,  $\text{CDCl}_3$ )  $\delta$  4.33 (t,  $J = 15.6$  Hz, 1H), 4.85 (t,  $J = 18.7$  Hz, 1H) 5.43 (t,  $J = 18.7$  Hz, 1H), 7.28-7.38 (m, 5H), 8.19 (d,  $J = 11.0$  Hz, 2H), 8.27 (d,  $J = 11.0$  Hz, 2H).  $^{13}\text{C}$  NMR (125 MHz,  $\text{CDCl}_3$ )  $\delta$  70.48, 75.41, 123.67, 126.80, 128.02, 129.00, 129.60, 133.45, 141.66, 149.72, 163.00 ppm. IR (neat) 3065, 2949, 1631, 1481  $\text{cm}^{-1}$ , HRMS (DART) calcd for  $\text{C}_{15}\text{H}_{12}\text{N}_2\text{O}_3$   $[\text{M}+\text{H}]^+$ : 269.0926 found: 269.0923.

A two necked round bottom flask (100 mL) fitted with a magnetic stirring bar and a reflux condenser was charged with (*S*)-2-(4-nitrophenyl)-4-phenyl-4,5-dihydrooxazole ligand (200.0 mg, 0.75 mmol),  $[\text{RuCl}_2(\text{benzene})]_2$  (187.6 mg, 0.38 mmol) and  $\text{KPF}_6$  (552.0 mg, 3.0 mmol). The reaction flask was evacuated and backfilled with argon. Through the side arm  $\text{CH}_3\text{CN}$  (20 mL, degassed) and  $\text{NaOH}$  (aq.) (30.0 mg, 0.75 mmol) were injected. The suspended reaction mixture was refluxed for 24 h at 80 °C. The solvent was removed under reduced pressure and the residue was purified by silica gel column chromatography with  $\text{CH}_3\text{CN}/\text{CH}_2\text{Cl}_2$  (1/20 (v/v)) to give the desired complex **3d** (86% yield) as a green solid.  $^1\text{H}$  NMR (500 MHz,  $\text{CD}_3\text{CN}$ )  $\delta$  1.93 (s, 3H), 2.10 (s, 3H), 2.13 (s, 3H) 2.45 (s, 3H), 4.60 (t,  $J = 26.4$  Hz, 1H), 5.17 (d,  $J = 23.7$  Hz, 2H), 7.33-7.46 (m, 5H), 7.60 (d,  $J = 8.4$  Hz, 1H), 7.72 (d,  $J = 10.7$  Hz, 1H), 8.55 (d,  $J = 2.3$  Hz, 1H).  $^{13}\text{C}$  NMR (125 MHz,  $\text{CD}_3\text{CN}$ )  $\delta$  1.10, 3.00, 3.04, 3.43, 68.52, 78.51, 115.70, 121.89, 122.18, 123.21, 125.80, 128.38, 128.48, 131.40, 140.73, 141.60, 147.81, 174.02, 190.57 ppm. IR (neat)  $\nu$  2972, 2289, 1664  $\text{cm}^{-1}$ .

### 3. Synthesis of Ru(II)-*Amm*-Pheox complexes

#### (Chloromethyl)phenyl-Pheox (**5**)

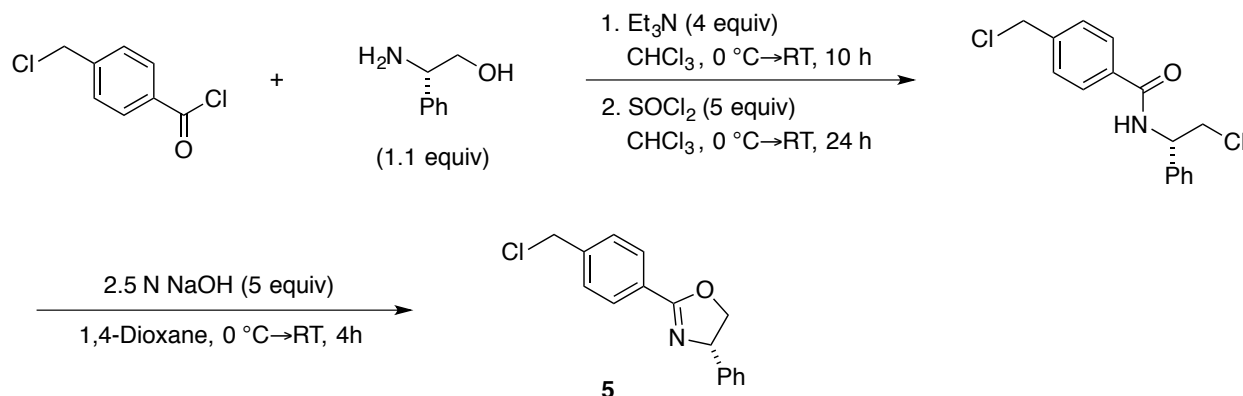

To a mixture of (*S*)-(+)-2-phenylglycinol (301.0 mg, 2.19 mmol) and  $\text{Et}_3\text{N}$  (0.8 mL, 7.96 mmol) in  $\text{CHCl}_3$  (7.0 mL), a solution of 4-(chloromethyl)benzoyl chloride (376.0 mg, 1.99 mmol) in  $\text{CHCl}_3$  (4.00 mL) was added dropwise with magnetic stirring at  $0\text{ }^\circ\text{C}$ . After the stirring for 10 h at room temperature, the reaction mixture was concentrated under reduced pressure. The residue was dissolved in  $\text{CHCl}_3$  (12.0 mL) and treated with  $\text{SOCl}_2$  (1.2 mL, 9.95 mmol) at  $0\text{ }^\circ\text{C}$ . After stirring for 24 h at room temperature, the solvent and the excess of  $\text{SOCl}_2$  were removed under reduced pressure. Sat.  $\text{NaHCO}_3$  (aq.) (30 mL) was added to the residue with stirring for 5 min. the organic product was extracted with  $\text{CH}_2\text{Cl}_2$  ( $3 \times 25\text{ mL}$ ), dried over anhydrous  $\text{Na}_2\text{SO}_4$ , and concentrated under reduced pressure. By using a sonicator, the solid residue was dissolved in 1,4-dioxane (10 mL) and 2.5 N NaOH (aq.) (398.0 mg, 9.95 mmol) was added slowly at  $0\text{ }^\circ\text{C}$ , then the reaction mixture was stirred for 4 h at room temperature. The solvent was removed under vacuum, followed by addition of water (25 mL) and  $\text{CH}_2\text{Cl}_2$  ( $3 \times 25\text{ mL}$ ) for extraction. The solvent was evaporated under vacuum and the crude product was purified by column chromatography on silica gel ( $\text{EtOAc}/n\text{-Hexane}$ ) (1/10 (v/v)) to afford (*S*)-2-(4-(chloromethyl)phenyl)-4-phenyl-4,5-dihydrooxazole **5** (86% yield) as a pale yellow solid.  $R_f = 0.53$  ( $n\text{-Hexane}/\text{EtOAc}$ ) (2/1 (v/v)).  $[\alpha]_D^{24} = -20.1$  (c 1.00,  $\text{CHCl}_3$ ).  $^1\text{H}$  NMR (500 MHz,  $\text{CDCl}_3$ )  $\delta$  4.25 (t,  $J = 15.7\text{ Hz}$ , 1H), 4.6 (s, 2H), 4.75 (t,  $J = 18.6\text{ Hz}$ , 1H), 5.36 (t,  $J = 17.4\text{ Hz}$ , 1H), 7.31-7.40 (m, 5H), 7.46 (d,  $J = 7.6\text{ Hz}$ , 2H), 8.07 (d,  $J = 7.6\text{ Hz}$ , 2H).  $^{13}\text{C}$  NMR (125 MHz,  $\text{CDCl}_3$ )  $\delta$  45.73, 70.28, 75.07, 126.88, 127.72, 127.82, 128.70, 128.93, 129.01, 140.93, 142.40, 164.30. IR (neat) 3078, 2915, 1614, 1492  $\text{cm}^{-1}$ . HRMS (DART) calcd for  $\text{C}_{16}\text{H}_{14}\text{ClNO}$   $[\text{M}+\text{H}]^+$ : 272.0844 found: 272.0847.

### Ru(II)-(chloromethyl)phenyl-Pheox

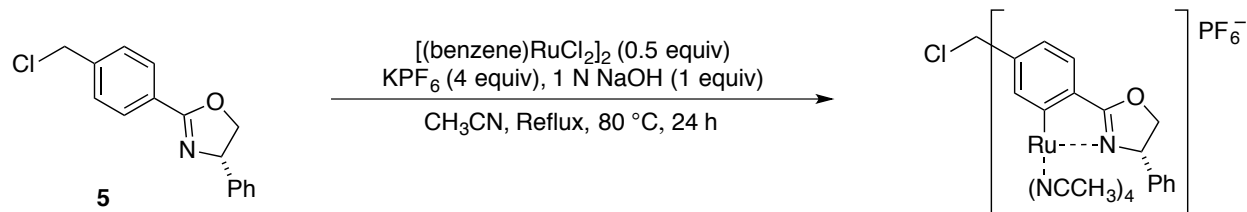

A two necked round bottom flask (100.0 ml) fitted with a magnetic stirring bar and a reflux condenser was charged with a mixture of (*S*)-2-(4-(chloromethyl)phenyl)-4-phenyl-4,5-dihydrooxazole ligand **5** (149 mg, 0.55 mmol),  $[\text{RuCl}_2(\text{benzene})]_2$  (137 mg, 0.28 mmol), and  $\text{KPF}_6$  (412 mg, 2.24 mmol). The reaction flask was evacuated and backfilled with argon. Through the side arm  $\text{CH}_3\text{CN}$  (20 mL, degassed) and NaOH (aq.) (22 mg, 0.55 mmol) was injected. The suspended reaction mixture was refluxed for 24 h at 80 °C. The solvent was removed under reduced pressure and the residue was purified by silica gel column chromatography with  $\text{CH}_3\text{CN}/\text{CH}_2\text{Cl}_2$  (1/20 (v/v)) to give the desired complex Ru(II)-(chloromethyl)phenyl-Pheox (96% yield) as a yellow solid.  $^1\text{H}$  NMR (400 MHz,  $\text{CDCl}_3$ )  $\delta$  1.99 (s, 3H), 2.10 (s, 3H), 2.14 (s, 3H), 2.47 (s, 3H), 4.51 (t,  $J = 15.8$  Hz, 1H), 4.70 (s, 2H), 5.12 (t,  $J = 18.6$  Hz, 2H), 6.94 (d,  $J = 7.6$  Hz, 1H), 7.31-7.43 (m, 5H), 7.48 (d,  $J = 7.6$  Hz, 1H), 7.87 (s, 1H).  $^{13}\text{C}$  NMR (125 MHz,  $\text{CDCl}_3$ )  $\delta$  3.12, 4.02, 4.05, 4.39, 47.52, 67.76, 78.11, 120.43, 120.78, 121.37, 121.88, 125.94, 127.97, 128.34, 134.76, 137.87, 138.22, 141.48, 174.67, 186.67 ppm. IR (neat)  $\nu$  2271, 1621, 1455  $\text{cm}^{-1}$ .

### Ru(II)-(iodomethyl)phenyl-Pheox (**6**)

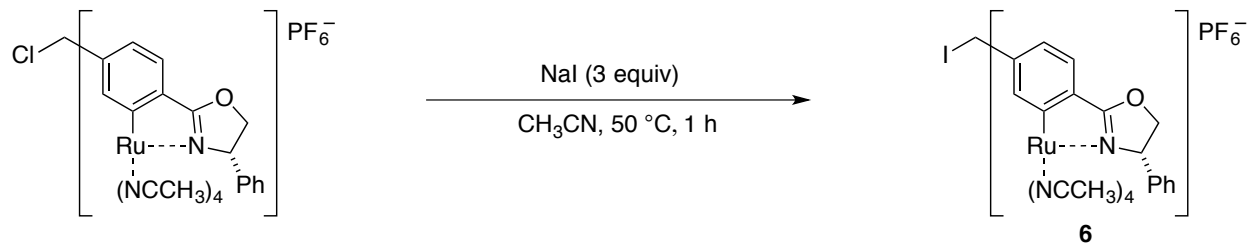

A mixture of Ru(II)-(chloromethyl)phenyl-Pheox complex (590.0 mg, 0.86 mmol), NaI (376.0 mg, 2.59 mmol) were placed in a two necked flask equipped with a magnetic stirring bar and a reflux condenser. The system was evacuated and backfilled with argon.  $\text{CH}_3\text{CN}$  (dry) (15 mL) was injected. The reaction mixture was refluxed for 1 h at 50 °C. During period of reaction time, the white crystalline salt (NaCl) was formed as a side product. The reaction was monitored by  $^1\text{H}$  NMR until the conversion was completely finished. The solvent was removed under reduced pressure and the residue was purified by column chromatography on silica gel with  $\text{CH}_3\text{CN}/\text{CH}_2\text{Cl}_2$  (1/20 (v/v)) to afford Ru(II)-

(iodomethyl)phenyl-Pheox complex **6** (98% yield) as a dark green color.  $^1\text{H}$  NMR (400 MHz,  $\text{CDCl}_3$ )  $\delta$  1.99 (s, 3H), 2.11 (s, 3H), 2.12 (s, 3H), 2.44 (s, 3H), 4.49 (t,  $J = 5.4$  Hz, 1H), 4.59 (s, 2H), 5.08 (dd,  $J = 6.1$  Hz, 2H), 6.97 (d,  $J = 7.8$  Hz, 1H), 7.30-7.41 (m, 6H), 7.87 (d,  $J = 1.8$  Hz, 1H).  $^{13}\text{C}$  NMR (125 MHz,  $\text{CD}_3\text{CN}$ )  $\delta$  1.02, 3.10, 3.51, 7.90, 68.11, 78.13, 121.52, 121.66, 122.71, 125.79, 128.16, 128.40, 134.60, 138.04, 140.28, 141.40, 174.60, 187.62 ppm. IR (neat)  $\nu$  2359, 2341, 2271, 1619,  $\text{cm}^{-1}$ .

### Ru(II)-*Amm*-Pheox (**7a**)

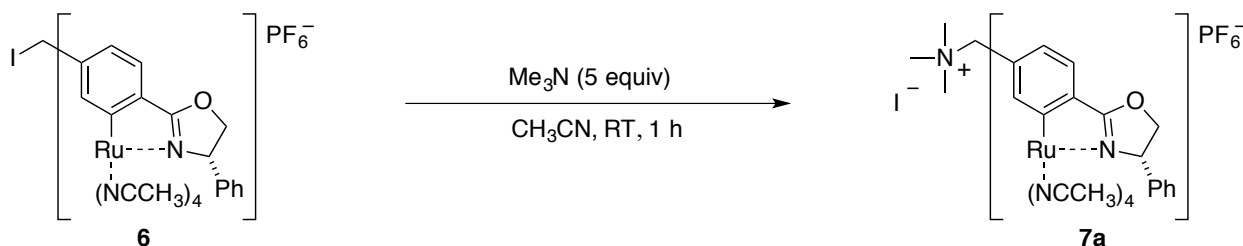

Into a schlenktype flask equipped with a magnetic stirring Ru(II)-(iodomethyl)phenyl-Pheox complex **6** (100.0 mg, 0.13 mmol) was added. The system was evacuated and backfilled with argon. Trimethylamine (44  $\mu\text{L}$ , 0.65 mmol) and  $\text{CH}_3\text{CN}$  (dry) (5 mL) was injected from the side arm. The reaction mixture was stirred at room temperature for 1 h. The reaction progress was monitored by  $^1\text{H}$  NMR and TLC until the reaction was finished. The solvent was removed under reduced pressure and the residue was purified by column chromatography on silica gel with  $\text{CH}_3\text{CN}/\text{CH}_2\text{Cl}_2$  (1/5 (v/v)) to afford the desired product **7a** (47% yield).  $^1\text{H}$  NMR (400 MHz,  $\text{CD}_3\text{CN}$ )  $\delta$  1.93 (s, 3H), 1.97 (s, 3H), 2.10 (s, 3H), 2.43 (s, 3H), 3.01 (s, 9H), 4.39 (s, 2H), 4.53 (t,  $J = 29.4$  Hz, 1H), 5.12 (d,  $J = 3.0$  Hz, 2H), 7.00 (d,  $J = 9.2$  Hz, 1H), 7.31-7.37 (m, 3H), 7.39-7.42 (m, 2H), 7.53 (d,  $J = 7.6$  Hz, 1H), 7.85 (d,  $J = 1.5$  Hz, 1H).  $^{13}\text{C}$  NMR (125 MHz,  $(\text{CD}_3)_2\text{CO}$ )  $\delta$  2.89, 3.29, 3.41, 3.56, 53.23, 69.07, 71.07, 79.05, 121.89, 122.58, 122.82, 123.97, 125.48, 126.34, 129.08, 129.34, 138.12, 142.18, 143.81, 175.47, 189.93 ppm. IR (neat)  $\nu$  2359, 2341, 2273, 1622  $\text{cm}^{-1}$ .

### Ru(II)-*Amm*-Pheox (**7b**)

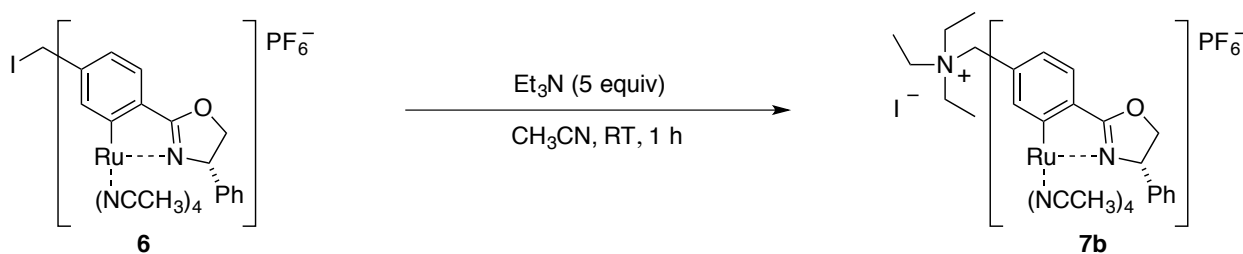



Into a schlenktype flask equipped with a magnetic stirring Ru(II)-(iodomethyl)phenyl-Pheox complex **6** (100.0 mg, 0.13 mmol) was added. The system was evacuated and backfilled with argon. Triethylamine (90  $\mu$ L, 0.65 mmol) and CH<sub>3</sub>CN (dry) (5 mL) was injected from the side arm. The reaction mixture was stirred at room temperature for 1 h. The reaction progress was monitored by <sup>1</sup>H NMR and TLC until the reaction was finished. The solvent was removed under reduced pressure and the residue was purified by column chromatography on silica gel with CH<sub>3</sub>CN/CH<sub>2</sub>Cl<sub>2</sub> (1/5 (v/v)) to afford the desired product **7b** (42% yield). <sup>1</sup>H NMR (400 MHz, CD<sub>3</sub>CN)  $\delta$  1.37 (t,  $J$  = 7.2 Hz, 9H), 1.99 (s, 3H), 2.11 (s, 3H), 2.19 (s, 3H), 2.42 (s, 3H), 3.19 (q,  $J$  = 7.2 Hz, 6H), 4.32 (s, 2H), 4.53 (t,  $J$  = 13.3 Hz, 1H), 5.12 (d,  $J$  = 25.2 Hz, 2H), 6.97 (d,  $J$  = 1.8 Hz, 1H), 7.30-7.44 (m, 5H), 7.53 (d,  $J$  = 7.3 Hz, 1H), 7.88 (s, 1H). <sup>13</sup>C NMR (125 MHz, CD<sub>3</sub>CN)  $\delta$  2.92, 3.33, 7.27, 52.55, 61.18, 67.73, 68.80, 121.55, 121.86, 122.85, 123.64, 123.86, 125.47, 127.35, 128.31, 137.21, 141.07, 142.00, 174.43, 188.85 ppm. IR (neat)  $\nu$  2359, 2341, 2274, 1622 cm<sup>-1</sup>.

#### Ru(II)-*Amm*-Pheox (**7c**)

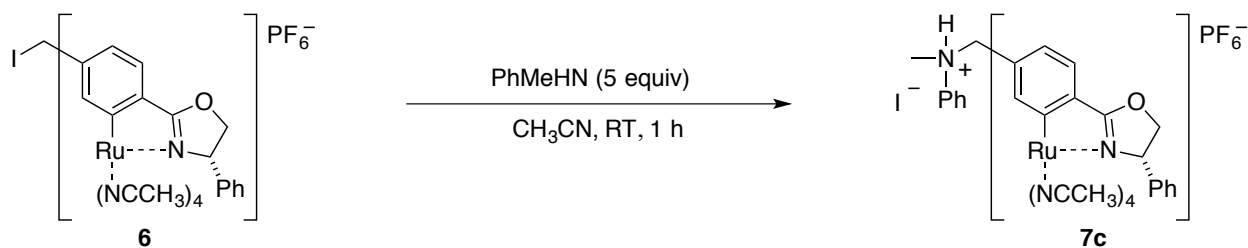

Into a schlenktype flask equipped with a magnetic stirring Ru(II)-(iodomethyl)phenyl-Pheox complex **6** (100.0 mg, 0.129 mmol) was added. The system was evacuated and backfilled with argon. *N*-methylaniline (70  $\mu$ L, 0.65 mmol) and CH<sub>3</sub>CN (10 mL) was injected from the side arm. The reaction mixture was stirred at room temperature for 1 h. The reaction progress was monitored by <sup>1</sup>H NMR and TLC until the reaction was finished. The solvent was removed under reduced pressure and the residue was purified by column chromatography on silica gel with CH<sub>3</sub>CN/CH<sub>2</sub>Cl<sub>2</sub> (1/5 (v/v)) to afford the desired product **7c** with (41% yield.) <sup>1</sup>H NMR (400 MHz, CD<sub>3</sub>CN)  $\delta$  1.93 (s, 3H), 1.98 (s, 3H), 2.11 (s, 3H), 2.26 (s, 3H), 3.04 (s, 3H), 4.45 (s, 1H), 4.58 (s, 2H), 5.07 (d,  $J$  = 3.0 Hz, 2H), 6.58-6.62 (m, 1H), 6.74-6.77 (m, 3H), 7.13-7.17 (m, 2H), 7.29-7.32 (m, 3H), 7.36-7.39 (m, 3H), 7.69 (s, 1H) ppm. <sup>13</sup>C NMR (125 MHz, CD<sub>3</sub>CN)  $\delta$  3.04, 3.06, 38.39, 56.23, 68.03, 78.04, 112.16, 115.96, 119.24, 121.33, 121.62, 122.36, 125.68, 128.08, 128.39, 129.11, 133.37, 136.44, 140.20, 141.55, 149.83, 174.80, 186.94 ppm. IR (neat)  $\nu$  2962, 2359, 2271, 1619 cm<sup>-1</sup>.

### Ru(II)-*Amm*-Pheox (**7d**)

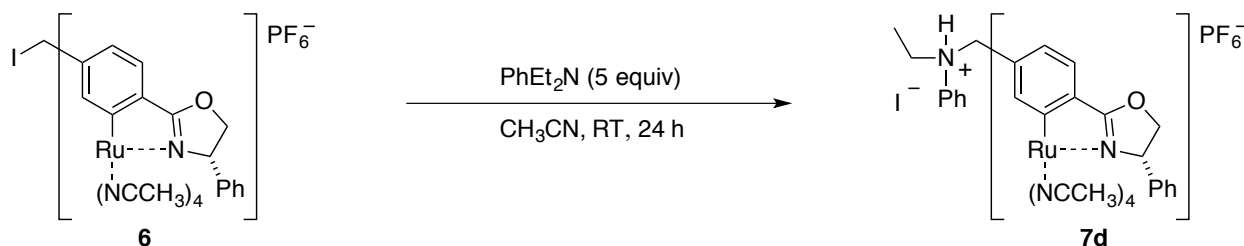

Into a schlenktype flask equipped with a magnetic stirring Ru(II)-(iodomethyl)phenyl-Pheox complex **6** (100.0 mg, 0.13 mmol) was added. The system was evacuated and backfilled with argon. *N,N*-diethylaniline (82  $\mu\text{L}$ , 0.65 mmol) and  $\text{CH}_3\text{CN}$  (dry) (10 mL) was injected from the side arm. The reaction mixture was stirred at room temperature for 24 h. The reaction progress was monitored by  $^1\text{H}$  NMR and TLC until the reaction was finished. The solvent was removed under reduced pressure and the residue was purified by column chromatography on silica gel with  $\text{CH}_3\text{CN}/\text{CH}_2\text{Cl}_2$  (1/20 (v/v)) to afford the desired product **7d** (54% yield).  $^1\text{H}$  NMR (500 MHz,  $\text{CD}_3\text{CN}$ )  $\delta$  1.17 (t,  $J = 16.8$  Hz, 3H), 1.97 (s, 3H), 2.10 (s, 3H), 2.15 (s, 3H), 2.23 (s, 3H), 3.51 (q,  $J = 7.26, 14.14$  Hz, 2H), 4.68 (t,  $J = 7.26$  Hz, 1H), 4.55 (s, 2H), 5.06 (t,  $J = 7.64$  Hz, 2H), 5.42 (s, 1H), 6.56 (t,  $J = 14.52$  Hz, 1H), 6.71 (d,  $J = 8.03$  Hz, 2H), 6.77 (d,  $J = 9.0$  Hz, 1H), 7.12 (t,  $J = 16.0$  Hz, 2H), 7.31-7.33 (m, 3H), 7.37-7.40 (m, 3H), 7.74 (s, 1H).  $^{13}\text{C}$  NMR (125 MHz,  $\text{CD}_3\text{CN}$ )  $\delta$  3.05, 11.67, 45.32, 53.96, 68.03, 78.04, 112.01, 115.55, 119.06, 122.34, 125.67, 128.08, 128.10, 128.39, 129.15, 133.28, 136.25, 140.59, 141.56, 148.62, 174.81, 186.88 ppm. IR (neat)  $\nu$  2957, 2397, 1654  $\text{cm}^{-1}$ .

### 4. General procedure for asymmetric cyclopropanation of olefins with diazo Weinreb amides

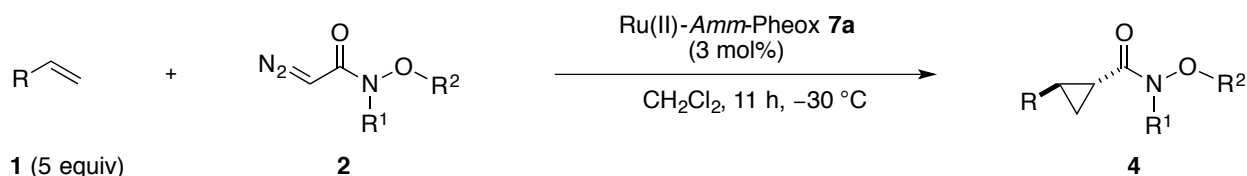

To a solution of Ru(II)-*Amm*-Pheox **7a** (3 mol%) and olefins (5 equiv) in  $\text{CH}_2\text{Cl}_2$  under argon atmosphere at  $-30^\circ\text{C}$ , diazo Weinreb amides **2a–c** solution in  $\text{CH}_2\text{Cl}_2$  was slowly added using a syringe pump over 10 h. After 10 h the syringe was washed with additional 1 mL of  $\text{CH}_2\text{Cl}_2$  and the reaction mixture was stirred for additional 1 h. The progress of the reaction was monitored by TLC,  $^1\text{H}$  NMR. After the reaction finished, the mixture was concentrated using reduced pressure and the residue was purified by column chromatography on silica gel eluted with (*n*-Hexane/EtOAc) to give the desired cyclopropane product.

The *trans/cis* ratio was determined from the crude  $^1\text{H}$  NMR spectra and the ee value was determined by chiral HPLC analysis.

## 5. Analytical Data for Asymmetric Cyclopropanation Reaction Products

### *N*-Methoxy-*N*-methyl-2-phenylcyclopropanecarboxamide (4a)

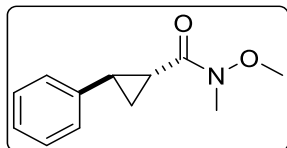

According to the typical procedure for asymmetric cyclopropanation reaction between styrene (133.0  $\mu\text{L}$ , 1.16 mmol) and *N*-methoxy-*N*-methyldiazoacetamide (MMD) (30.0 mg, 0.23 mmol). The resulting mixture was purified by silica gel column chromatography with *n*-Hexane/EtOAc (3/1 (v/v)) as an eluent to give the desired product in 80% yield as yellow oil.  $[\alpha]_D^{29} = -142.6$  (c 2.06,  $\text{CHCl}_3$ ). *trans/cis* = 83/17, 90% *trans* ee.  $^1\text{H}$  NMR (400 MHz,  $\text{CDCl}_3$ ) (*trans* isomer)  $\delta$  1.26-1.32 (m, 1H), 1.56-1.63 (m, 1H), 2.36 (s br, 1H), 2.46-2.53 (m, 1H), 3.20 (s, 3H), 3.65 (s, 3H), 7.1-7.3 (m, 5H) ppm.  $^{13}\text{C}$  NMR (100 MHz,  $\text{CDCl}_3$ ) (*trans* isomer)  $\delta$  16.57, 21.66, 26.00, 32.70, 61.79, 126.32, 128.01, 128.52, 140.88, 173.16. IR (neat)  $\nu$  2936, 2359, 2341, 1653  $\text{cm}^{-1}$ . The ee value was determined by HPLC analysis. Column (Chiral AS-H), UV detector 230 nm, eluent: Hex/IPA = 20/1, Flow rate = 1.0 mL/min,  $t_R$  = 9.88 min (minor product),  $t_R$  = 11.90 min (major product). HRMS (DART) calcd for  $\text{C}_{12}\text{H}_{15}\text{NO}_2$   $[\text{M}+\text{H}]^+$ : 206.1181 found: 206.1188.

### *N*-Benzyl-*N*-methoxy-2-phenylcyclopropanecarboxamide (4b)

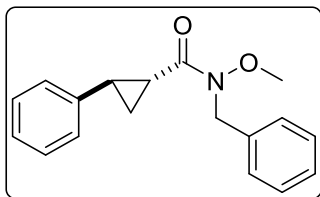

According to the typical procedure for asymmetric cyclopropanation reaction between styrene (83.7  $\mu\text{L}$ , 0.73 mmol) and *N*-benzyl-*N*-methoxydiazoacetamide (BMD) (30.0 mg, 0.146 mmol). The resulting mixture was purified by silica gel column chromatography with *n*-Hexane/EtOAc (2/1 (v/v)) as an eluent to give the desired product in 70% yield as yellow oil.  $[\alpha]_D^{28} = -147.6$  (c 1.98,  $\text{CHCl}_3$ ). *trans/cis* = 80:20, 80% *trans* ee.  $^1\text{H}$  NMR (500 MHz,  $\text{CDCl}_3$ ) (*trans* isomer)  $\delta$  1.32-1.36 (m, 1H), 1.68-1.72 (m, 1H), 2.46 (s br, 1H), 2.55-2.59 (m, 1H), 3.63 (s, 3H), 4.79 (d,  $J$  = 15.26 Hz, 1H), 4.88 (d,  $J$  = 15.26 Hz, 1H).  $^{13}\text{C}$  NMR (125 MHz,  $\text{CDCl}_3$ ) (*trans* isomer)  $\delta$  16.89, 21.95, 26.28, 49.48, 62.84, 126.33, 126.45, 127.76, 128.47, 128.58, 128.69, 136.64, 140.82, 173.37 ppm. IR (neat)  $\nu$  3030, 2359, 2341, 1653  $\text{cm}^{-1}$ . The ee value was determined by HPLC analysis. Column (Chiral AS-H), UV detector 254 nm, eluent: Hex/IPA = 20/1, Flow rate = 0.5 mL/min,  $t_R$  = 23.17 min (minor product),  $t_R$  = 24.97 min (major product). HRMS (DART) calcd for  $\text{C}_{18}\text{H}_{19}\text{NO}_2$   $[\text{M}+\text{H}]^+$ : 282.1494 found: 282.1491.

#### ***N*-Acetoxy-*N*-methyl-2-phenylcyclopropanecarboxamide (4c)**

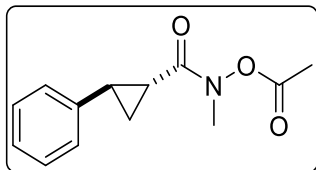

According to the typical procedure for asymmetric cyclopropanation reaction between styrene (110.0  $\mu\text{L}$ , 0.95 mmol) and methyl *N*-acetoxy-*N*-diazomethylacetamide (AMD) (30.0 mg, 0.19 mmol). The resulting mixture was purified by silica gel column chromatography with *n*-Hexane/EtOAc (2/1 (v/v)) as an eluent to give the desired product in 98% yield as yellow oil.  $[\alpha]_{\text{D}}^{25} = -135.4$  (c 3.83,  $\text{CHCl}_3$ ). *trans/cis* = 98/2, 92% *trans* ee.  $^1\text{H}$  NMR (500 MHz,  $\text{CDCl}_3$ ) (*trans* isomer)  $\delta$  1.26-1.32 (m, 1H), 1.61-1.66 (m, 1H), 1.87-1.93 (m, 1H), 2.06 (s, 3H), 2.41-2.48 (m, 1H), 3.32 (s, 3H), 7.07 (d,  $J=7.3$  Hz, 2H), 7.17-7.24 (m, 1H), 7.26-7.29 (m, 2H).  $^{13}\text{C}$  NMR (500 MHz,  $\text{CDCl}_3$ ) (*trans* isomer)  $\delta$  15.83, 18.35, 22.65, 26.22, 35.90, 126.33, 126.56, 128.58, 140.38, 168.62, 172.54 ppm. IR (neat)  $\nu$  3029, 2953, 1781, 1791, 1667, 1604  $\text{cm}^{-1}$ . The ee value was determined by HPLC analysis. Column (Chiral IE), UV detector 220 nm, eluent: Hex/IPA = 9/1, Flow rate = 1.0 mL/min,  $t_{\text{R}}$  = 19.07 min (minor product),  $t_{\text{R}}$  = 21.96 min (major product). HRMS (DART) calcd for  $\text{C}_{13}\text{H}_{15}\text{NO}_3$   $[\text{M}+\text{H}]^+$ : 234.1130 found: 234.1134.

#### ***N*-Acetoxy-*N*-methyl-2-(*p*-tolyl)cyclopropanecarboxamide (4d)**

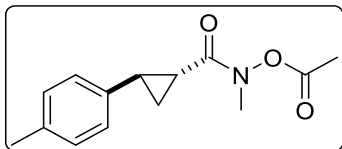

According to the typical procedure for asymmetric cyclopropanation reaction between 4-methylstyrene (126.0  $\mu\text{L}$ , 0.95 mmol) and *N*-acetoxy-*N*-methyldiazoacetamide (AMD) (30.0 mg, 0.19 mmol). The resulting mixture was purified by silica gel column chromatography with *n*-Hexane/EtOAc (2/1(v/v)) as an eluent to give the desired product in 96% yield as yellow oil.  $[\alpha]_{\text{D}}^{28} = -160.3$  (c 2.12,  $\text{CHCl}_3$ ). *trans/cis* = 96/4, 94% *trans* ee.  $^1\text{H}$  NMR (400 MHz,  $\text{CDCl}_3$ ) (*trans* isomer)  $\delta$  1.24-1.30 (m, 1H), 1.60-1.65 (m, 1H), 1.83-1.88 (m, 1H), 2.02 (s, 3H), 2.27 (s, 3H), 2.40-2.45 (m, 1H), 3.32 (s, 3H), 6.97 (d,  $J = 7.9$  Hz, 2H), 7.07 (d,  $J = 7.9$  Hz, 2H).  $^{13}\text{C}$  NMR (*trans* isomer)  $\delta$  (100 MHz,  $\text{CDCl}_3$ ) 15.76, 18.39, 21.09, 22.45, 26.00, 36.06, 126.30, 129.23, 136.15, 137.31, 168.59, 172.61 ppm. IR (neat)  $\nu$  2923, 2360, 2341, 1794, 1666  $\text{cm}^{-1}$ . The ee value was determined by HPLC analysis. Column (Chiral OJ-H), UV detector 220 nm, eluent: Hex/IPA = 50/1, Flow rate = 1.0 mL/min,  $t_{\text{R}}$  = 33.49 min (minor product),  $t_{\text{R}}$  = 43.77 min (major product). HRMS (DART) calcd for  $\text{C}_{14}\text{H}_{17}\text{NO}_3$   $[\text{M}+\text{H}]^+$ : 248.1286 found: 248.1287.

#### ***N*-Acetoxy-*N*-methyl-2-(*m*-tolyl)cyclopropanecarboxamide (4e)**

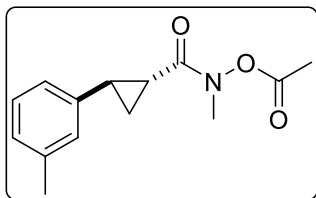

According to the typical procedure for asymmetric cyclopropanation reaction between 3-methylstyrene (125.0  $\mu\text{L}$ , 0.95 mmol) and *N*-acetoxy-*N*-methyldiazoacetamide (AMD) (30.0 mg, 0.19 mmol). The resulting mixture was purified by silica gel column chromatography with *n*-Hexane/EtOAc (2/1 (v/v)) as an eluent to give the desired product in 94% yield as colorless oil.  $[\alpha]_{\text{D}}^{26} = -142.4$  (c 2.12,  $\text{CHCl}_3$ ). *trans/cis* = 99/1, 92% *trans* ee.  $^1\text{H}$  NMR (400 MHz,  $\text{CDCl}_3$ ) (*trans* isomer)  $\delta$  1.27-1.32 (m, 1H), 1.61-1.66 (m, 1H), 1.86-1.90 (m, 1H), 2.05 (s, 3H), 2.30 (s, 3H), 2.40-2.74 (m, 1H), 3.32 (s, 3H), 6.86-6.90 (m, 2H), 6.99 (d,  $J = 7.3$  Hz, 1H), 7.14 (t,  $J = 14.9$  Hz, 1H) ppm.  $^{13}\text{C}$  NMR (400 MHz,  $\text{CDCl}_3$ ) (*trans* isomer)  $\delta$  15.79, 18.39, 21.47, 22.52, 26.18, 36.09, 123.29, 127.25, 127.31, 128.48, 138.16, 140.33, 168.59, 172.48 ppm. IR (neat)  $\nu$  2922, 2359, 1793, 1668  $\text{cm}^{-1}$ . The ee value was determined by HPLC analysis. Column (Chiral OJ-H), UV detector 220 nm, eluent: Hex/IPA = 50/1, Flow rate = 1.0 mL/min,  $t_{\text{R}} = 27.70$  min (minor product),  $t_{\text{R}} = 30.90$  min (major product). HRMS (DART) calcd for  $\text{C}_{14}\text{H}_{17}\text{NO}_3$   $[\text{M}+\text{H}]^+$ : 248.1286 found: 248.1282.

#### ***N*-Acetoxy-*N*-methyl-2-(*o*-tolyl)cyclopropanecarboxamide (4f)**

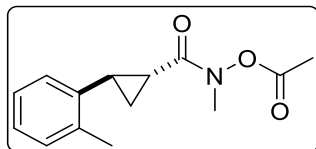

According to the typical procedure for asymmetric cyclopropanation reaction between 2-methylstyrene (125.3  $\mu\text{L}$ , 0.95 mmol) and *N*-acetoxy-*N*-methyldiazoacetamide (30.0 mg, 0.19 mmol). The resulting mixture was purified by silica gel column chromatography with *n*-Hexane/EtOAc (2/1 (v/v)) as an eluent to give the desired product in 97% yield as yellow oil.  $[\alpha]_{\text{D}}^{27} = -66.7$  (c 1.73,  $\text{CHCl}_3$ ). *trans/cis* = 99/1, 90% *trans* ee.  $^1\text{H}$  NMR (400 MHz,  $\text{CDCl}_3$ ) (*trans* isomer)  $\delta$  1.28-1.39 (m, 1H), 1.54-1.63 (m, 1H), 1.78-1.85 (m, 1H), 2.13 (s, 3H), 2.36 (s, 3H), 2.51-2.59 (m, 1H), 3.35 (s, 3H), 6.94-6.96 (m, 1H), 7.09-7.16 (m, 3H) ppm.  $^{13}\text{C}$  NMR (400 MHz,  $\text{CDCl}_3$ ) (*trans* isomer)  $\delta$  15.31, 18.53, 19.64, 20.51, 24.47, 36.52, 125.71, 125.92, 126.77, 130.02, 138.16, 138.29, 168.30, 172.99 ppm. IR (neat)  $\nu$  2953, 2359, 1793, 1664  $\text{cm}^{-1}$ . The ee value was determined by HPLC analysis. Column (Chiral OJ-H), UV detector 220 nm, eluent: Hex/IPA = 50/1, Flow rate = 1.0 mL/min,  $t_{\text{R}} = 21.90$  min (minor product),  $t_{\text{R}} = 26.64$  min (major product). HRMS (DART) calcd for  $\text{C}_{14}\text{H}_{17}\text{NO}_3$   $[\text{M}+\text{H}]^+$ : 248.1286 found: 248.1282.

#### ***N*-Acetoxy-2-(4-methoxyphenyl)-*N*-methylcyclopropanecarboxamide (4g)**

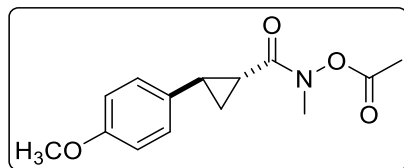

According to the typical procedure for asymmetric cyclopropanation reaction between 4-methoxy styrene (127.8  $\mu\text{L}$ , 0.95 mmol) and *N*-acetoxy-*N*-methyldiazoacetamide (AMD) (30.0 mg, 0.19 mmol).

The resulting mixture was purified by silica gel column chromatography with *n*-Hexane/EtOAc (2/1 (v/v)) as an eluent to give the desired product in 93% yield as yellow oil.  $[\alpha]_D^{23} = -122.9$  (c 1.32,  $\text{CHCl}_3$ ). *trans/cis* = 93/7, 96% *trans* ee.  $^1\text{H}$  NMR (400 MHz,  $\text{CDCl}_3$ ) (*trans* isomer)  $\delta$  1.22-1.25 (m, 1H), 1.57-1.61 (m, 1H), 1.77-1.81 (m, 1H), 2.03 (s, 3H), 2.13 (s, 3H), 2.37-2.44 (m, 1H), 3.30 (s, 3H), 3.74 (s, 3H), 6.76 (d,  $J = 8.2$  Hz, 2H), 6.99 (d,  $J = 8.4$  Hz, 2H) ppm.  $^{13}\text{C}$  NMR (125 MHz,  $\text{CDCl}_3$ ) (*trans* isomer)  $\delta$  15.53, 18.40, 22.33, 25.72, 36.05, 55.37, 113.97, 127.52, 132.31, 158.31, 168.63, 172.86 ppm. IR (neat)  $\nu$  2936, 2359, 1793, 1663  $\text{cm}^{-1}$ . The ee value was determined by HPLC analysis. Column (Chiral AS-H), UV detector 220 nm, eluent: Hex/IPA = 20/1, Flow rate = 1.0 mL/min,  $t_R = 24.85$  min (minor product),  $t_R = 27.60$  min (major product). HRMS (DART) calcd for  $\text{C}_{14}\text{H}_{17}\text{NO}_4$   $[\text{M}+\text{H}]^+$ : 264.1235 found: 264.1239.

#### ***N*-Acetoxy-2-(4-chlorophenyl)-*N*-methylcyclopropanecarboxamide (4h)**

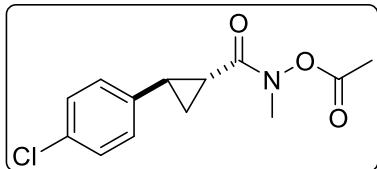

According to the typical procedure for asymmetric cyclopropanation reaction between 4-chlorostyrene (141.0  $\mu\text{L}$ , 0.95 mmol) and *N*-acetoxy-*N*-methyldiazoacetamide (30.0 mg, 0.19 mmol). The resulting mixture was purified by silica gel column chromatography with *n*-

Hexane/EtOAc (2/1 (v/v)) as an eluent to give the desired product in 94% yield as pale yellow oil.  $[\alpha]_D^{25} = -142.1$  (c 1.76,  $\text{CHCl}_3$ ). *trans/cis* = 99/1, 92% *trans* ee.  $^1\text{H}$  NMR (400 MHz,  $\text{CDCl}_3$ ) (*trans* isomer)  $\delta$  1.23-1.28 (m, 1H), 1.62-1.67 (m, 1H), 1.74-1.87 (m, 1H), 2.04 (s, 3H), 2.41-2.48 (m, 1H), 3.30 (s, 3H), 6.98 (d,  $J = 8.5$  Hz, 2H), 7.20 (d,  $J = 8.2$  Hz, 2H) ppm.  $^{13}\text{C}$  NMR (*trans* isomer)  $\delta$  (100 MHz,  $\text{CDCl}_3$ )  $\delta$  15.80, 18.40, 22.64, 25.56, 35.90, 127.72, 128.66, 132.21, 138.93, 168.56, 172.22 ppm. IR (neat)  $\nu$  2928, 2359, 1793, 1667  $\text{cm}^{-1}$ . The ee value was determined by HPLC analysis. Column (Chiral IE), UV detector 220 nm, eluent: Hex/IPA = 9/1, Flow rate = 1.0 mL/min,  $t_R = 16.43$  min (minor product),  $t_R = 19.83$  min (major product). HRMS (DART) calcd for  $\text{C}_{13}\text{H}_{14}\text{ClNO}_3$   $[\text{M}+\text{H}]^+$ : 268.0749 found: 268.0743.

#### ***N*-Acetoxy-*N*,2-dimethyl-2-phenylcyclopropanecarboxamide (4i)**

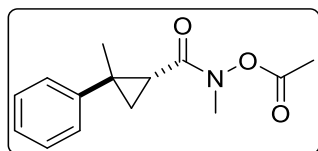

According to the typical procedure for asymmetric cyclopropanation reaction between  $\alpha$ -methylstyrene (124.0  $\mu\text{L}$ , 0.95 mmol) and *N*-acetoxy-*N*-

methyldiazoacetamide (AMD) (30.0 mg, 0.19 mmol). The resulting mixture was purified by silica gel column chromatography with *n*-Hexane/EtOAc (2/1 (v/v)) as an eluent to give the desired product in 96% yield as colorless oil.  $[\alpha]_D^{27} = +16.6$  (c 1.87, CHCl<sub>3</sub>). *trans/cis* = 96:4, 74% *trans* ee. <sup>1</sup>H NMR (500 MHz, CDCl<sub>3</sub>) (*trans* isomer) δ 1.43 (s, 3H), 1.44-1.48 (m, 1H), 1.56-1.58 (m, 1H), 1.82-2.00 (m, 4H), 3.34 (s, 3H), 7.16-7.30 (m, 5H) ppm. <sup>13</sup>C NMR (125 MHz, CDCl<sub>3</sub>) (*trans* isomer) δ 18.36, 18.95, 19.29, 28.14, 29.57, 35.71, 126.35, 126.39, 128.57, 145.65, 168.65, 171.07 ppm. IR (neat) ν 2956, 2360, 1792, 1670 cm<sup>-1</sup>. The ee value was determined by HPLC analysis. Column (Chiral IC3), UV detector 230 nm, eluent: Hex/IPA = 9/1, Flow rate = 1.0 mL/min, t<sub>R</sub> = 17.85 min (major product), t<sub>R</sub> = 28.29 min (minor product). HRMS (DART) calcd for C<sub>14</sub>H<sub>17</sub>NO<sub>3</sub> [M+H]<sup>+</sup>: 248.1286 found: 248.1282.

#### ***N*-Acetoxy-2-(*tert*-butoxy)-*N*-methylcyclopropanecarboxamide (4j)**

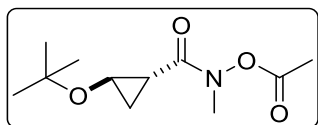

According to the typical procedure for asymmetric cyclopropanation reaction between 2-methyl-2-(vinylxy)propane (124.9 μL, 0.95 mmol) and *N*-acetoxy-*N*-methyldiazoacetamide (AMD) (30 mg, 0.19 mmol). The resulting mixture was purified by silica gel column chromatography with *n*-Hexane/EtOAc (2/1 (v/v)) as an eluent to give the desired product in 95% yield as yellow oil.  $[\alpha]_D^{24} = -13.6$  (c 1.90, CHCl<sub>3</sub>). *trans/cis* = 99/1, 91% *trans* ee. <sup>1</sup>H NMR (500 MHz, CDCl<sub>3</sub>) (*trans* isomer) δ 1.09-1.14 (m, 1H), 1.22 (s, 9H), 1.26-1.31 (m, 1H), 1.77-1.80 (m, 1H), 2.20 (s, 3H), 3.30 (s br, 3H), 3.54-3.57 (m, 1H) ppm. <sup>13</sup>C NMR (400 MHz, CDCl<sub>3</sub>) (*trans* isomer) δ 15.54, 18.56, 20.01, 28.01, 35.94, 54.66, 75.62, 168.42, 172.43 ppm. IR (neat) ν 2976, 2359, 1796, 1661 cm<sup>-1</sup>. The ee value was determined by HPLC analysis. Column (Chiral IE), UV detector 220 nm, eluent: Hex/IPA = 8/2, Flow rate = 1.0 mL/min, t<sub>R</sub> = 13.27 min (major product), t<sub>R</sub> = 14.19 min (minor product). HRMS (DART) calcd for C<sub>11</sub>H<sub>19</sub>NO<sub>4</sub> [M+H]<sup>+</sup>: 230.1392 found: 230.1390.

#### ***N*-Acetoxy-2-(9*H*-carbazol-9-yl)-*N*-methylcyclopropanecarboxamide (4k)**

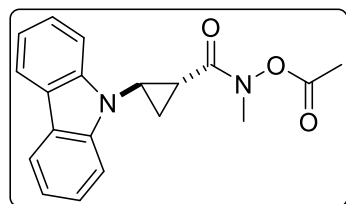

According to the typical procedure for asymmetric cyclopropanation reaction between *N*-vinylcarbazole (183.6 mg, 0.95 mmol) and *N*-acetoxy-*N*-methyldiazoacetamide (AMD) (30.0 mg, 0.19 mmol). The resulting mixture was purified by silica gel column chromatography with *n*-Hexane/EtOAc (2/1 (v/v)) as an eluent to give the desired product in 99% yield as colorless oil.  $[\alpha]_D^{25} = +53.3$  (c 3.04, CHCl<sub>3</sub>). *trans/cis* = 99/1, 96% *trans* ee. <sup>1</sup>H NMR (400 MHz, CDCl<sub>3</sub>) (*trans* isomer) δ 1.68-1.82 (m, 1H), 2.00-2.04 (m, 1H), 2.15 (s, 3H), 2.25-2.42 (m, 1H), 3.48 (s, 3H), 3.85-3.88 (m, 1H) 7.26 (t, *J* = 14.95, 2H), 7.47-7.56 (m, 4H), 8.06 (d, *J* = 7.63, 2H) ppm. <sup>13</sup>C

NMR (100 MHz, CDCl<sub>3</sub>) (*trans* isomer)  $\delta$  16.93, 18.66, 19.89, 32.92, 36.11, 109.95, 119.81, 120.46, 123.21, 126.04, 140.84, 168.52, 171.45 ppm. IR (neat)  $\nu$  2933, 1792, 1666 cm<sup>-1</sup>. The ee value was determined by HPLC analysis. Column (Chiral IC), UV detector 220 nm, eluent: Hex/IPA = 9/1, Flow rate = 1.0 mL/min, t<sub>R</sub> = 15.36 min (major product), t<sub>R</sub> = 17.18 min (minor product). HRMS (DART) calcd for C<sub>19</sub>H<sub>18</sub>N<sub>2</sub>O<sub>3</sub> [M+H]<sup>+</sup>: 323.1395 found: 323.1394.

#### *N*-Acetoxy-*N*-methyl-2-(*N*-methylacetamido)cyclopropanecarboxamide (**4l**)

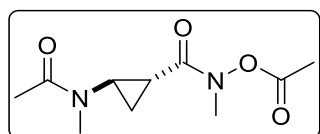

According to the typical procedure for asymmetric cyclopropanation reaction between vinyl acetate (87.94  $\mu$ L, 0.95 mmol) and *N*-acetoxy-*N*-methyldiazoacetamide (30.0 mg, 0.19 mmol). The resulting mixture was purified by silica gel column chromatography with *n*-Hexane/EtOAc (3/1 (v/v)) as an eluent to give the desired product in 86% yield as colorless oil.  $[\alpha]_D^{28} = -5.4$  (c 0.49, CHCl<sub>3</sub>). *trans/cis* = 91:9, 76% *trans* ee. <sup>1</sup>H NMR (500 MHz, CDCl<sub>3</sub>) (*trans* isomer)  $\delta$  1.29-1.34 (m, 1H), 1.52-1.57 (m, 1H), 1.92-1.97 (m, 1H), 2.12 (s, 3H), 2.23 (s, 3H), 2.85 (s, 3H), 3.20-3.24 (m, 1H), 3.31 (s, 3H) ppm. <sup>13</sup>C NMR (125 MHz, CDCl<sub>3</sub>) (*trans* isomer)  $\delta$  17.99, 18.59, 21.44, 22.48, 33.54, 35.77, 40.31, 168.36, 170.95, 173.16 ppm. IR (neat)  $\nu$  2929, 2359, 1792, 1654 cm<sup>-1</sup>. The ee value was determined by HPLC analysis. Column (Chiral AS-H), UV detector 230 nm, eluent: Hex/IPA = 6/4, Flow rate = 1.0 mL/min, t<sub>R</sub> = 12.34 min (major product), t<sub>R</sub> = 15.62 min (minor product). HRMS (DART) calcd for C<sub>10</sub>H<sub>16</sub>N<sub>2</sub>O<sub>4</sub> [M+NH<sub>4</sub>]<sup>+</sup>: 246.1453 found: 246.1456.

#### 6. Synthetic transformations of cyclopropyl Weinreb amides

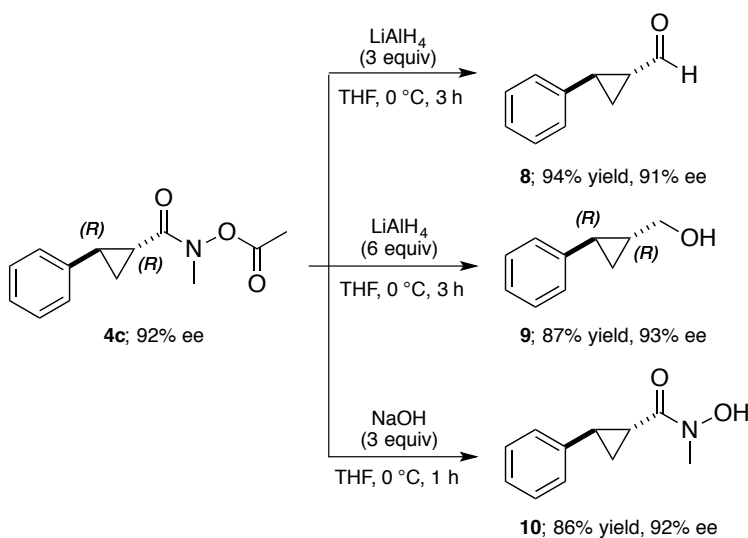



## 2-Phenylcyclopropanecarbaldehyde (**8**)

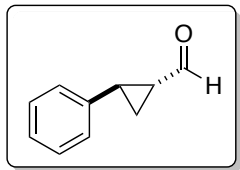

Under argon atmosphere, to a solution of *N*-acetoxy-*N*-methyl-2-phenylcyclopropanecarboxamide **4c** (50 mg, 0.21 mmol) in THF (3 mL), was added LiAlH<sub>4</sub> (24 mg, 0.63 mmol) in small portions at 0 °C. After stirring for 1 h at 0 °C, H<sub>2</sub>O (50 μL), 20% NaOH (aq) (50 μL), H<sub>2</sub>O (100 μL) was added successively, and then stirred at room temperature for 2 h, after which the reaction was quenched by adding excess amount of saturated NH<sub>4</sub>Cl aqueous solution, followed by extraction with diethyl ether. The organic phase was washed with brine and then dried over anhydrous Na<sub>2</sub>SO<sub>4</sub>. After the solution was filtered and the solvent was evaporated under vacuum, the residue was subjected to silica gel column chromatography using *n*-Hexane/EtOAc (2/1 (v/v)) as eluent to give the corresponding aldehyde **8** (94% yield, *trans/cis* = 99:1, 91% ee). <sup>1</sup>H NMR (500 MHz, CDCl<sub>3</sub>) δ 1.51-1.55 (m, 1H), 1.71-1.75 (m, 1H), 2.14-2.19 (m, 1H), 2.60-2.64 (m, 1H), 7.10 (d, *J* = 7.63 Hz, 2H), 7.20-7.30 (m, 3H), 9.31 (d, *J* = 4.59, 1 H) ppm. <sup>13</sup>C NMR (125 MHz, CDCl<sub>3</sub>) δ 16.57, 26.68, 33.91, 126.34, 126.93, 128.70, 139.04, 199.83 ppm.<sup>2</sup> The ee value was determined by HPLC analysis. Column (Chiral AD3), UV detector 230 nm, eluent: Hex/IPA = 6/4, Flow rate = 0.5 mL/min, t<sub>R</sub> = 10.37 min (minor product), t<sub>R</sub> = 11.42 min (major product).

## ((1*R*,2*R*)-2-phenylcyclopropyl)methanol (**9**)

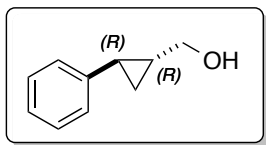

Under argon atmosphere, to a solution of *N*-acetoxy-*N*-methyl-2-phenylcyclopropanecarboxamide **4c** (50 mg, 0.21 mmol) in 3 mL THF, was added LiAlH<sub>4</sub> (48 mg, 1.26 mmol) in small portions at 0 °C. After stirring for 1 h at 0 °C, 100 μL H<sub>2</sub>O, 100 μL 20% NaOH (aq), 200 μL H<sub>2</sub>O was added successively, and then stirred at room temperature for 2 h, after which the reaction was quenched by adding excess amount of saturated NH<sub>4</sub>Cl aqueous solution, followed by extraction with diethyl ether. The organic phase was washed with brine and then dried over anhydrous Na<sub>2</sub>SO<sub>4</sub>. After the solution was filtered and the solvent was evaporated under vacuum, the residue was subjected to silica gel column chromatography using petroleum *n*-Hexane/EtOAc (2/1 (v/v)) as eluent to give the corresponding alcohol **9** (87% yield, *trans/cis* = 99:1, 93% ee). [ $\alpha$ ]<sub>D</sub><sup>26</sup> = -69.3 (c 0.49, CHCl<sub>3</sub>). <sup>1</sup>H NMR (500 MHz, CDCl<sub>3</sub>) δ 0.94-0.98 (m, 2H), 1.42-1.49 (m, 1H), 1.80-1.84 (m, 1H), 3.58-3.65 (m, 2H), 7.06 (d, *J* = 6.12 Hz, 2H), 7.15 (t, *J* = 7.26 Hz, 1H), 7.24-7.27 (m, 2H) ppm. <sup>13</sup>C NMR (125 MHz, CDCl<sub>3</sub>) δ 13.95, 21.38, 25.41, 66.70, 125.75, 125.90, 128.44, 142.49 ppm.<sup>3</sup> The ee value was determined by HPLC analysis. Column (Chiral OD-H), UV detector 254 nm, eluent: Hex/IPA = 9/1, Flow rate = 0.5 mL/min, t<sub>R</sub> = 15.18 min (minor product), t<sub>R</sub> = 21.53 min (major product).

### ***N*-Hydroxy-*N*-methyl-2-phenylcyclopropanecarboxamide (10)**

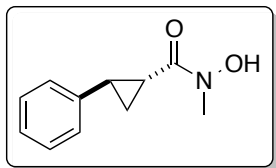

In a two way flask, NaOH aqua solution (15.4 mg, 0.39 mmol) was added from the side arm of the flask to a solution of *N*-acetoxy-*N*-methyl-2-phenylcyclopropanecarboxamide **4c** (30.0 mg, 0.13 mmol) in THF at 0 °C and the reaction mixture was stirred for 1 h. The reaction progress was monitored using TLC. After the end of the reaction, the reaction mixture was concentrated and extracted using diethyl ether and the organic layer was dried using sodium sulfate anhydrous. Then the organic solvent was removed using reduced pressure and the residue was purified using column chromatography *n*-Hexane/EtOAc (1/1 (v/v)) to give the desired product **10** (86% yield, *trans/cis* = 99:1, 92% ee).  $[\alpha]_D^{29} = -79.2$  (c 1.56, CHCl<sub>3</sub>). <sup>1</sup>H NMR (500 MHz, CD<sub>3</sub>OD)  $\delta$  1.27 (m, 1H), 1.45 (m, 1H), 2.32 (m, 1H), 2.59 (m, 1H), 3.21 (s, 3H), 3.27 (m, 1H), 7.09 (m, 3H), 7.21 (m, 2H) ppm. <sup>13</sup>C NMR (125 MHz, CD<sub>3</sub>OD)  $\delta$  15.42, 21.11, 25.20, 35.37, 125.82, 125.97, 128.13, 140.79, 173.19 ppm. IR (neat)  $\nu$  3169, 2923, 2360, 2341, 1605 cm<sup>-1</sup>. The ee value was determined by HPLC analysis. Column (Chiral IE), UV detector 230 nm, eluent: Hex/IPA = 9/1, Flow rate = 1.0 mL/min, t<sub>R</sub> = 7.43 min (minor product), t<sub>R</sub> = 8.06 min (major product). HRMS (DART) calcd for C<sub>11</sub>H<sub>13</sub>NO<sub>2</sub> [M+H]<sup>+</sup>: 192.1022 found: 192.1024.

### **Phenyl(2-phenylcyclopropyl)methanone (11)**

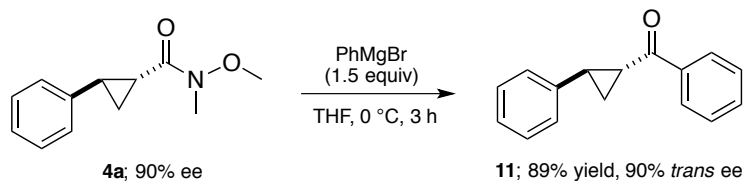

Under argon atmosphere, to a solution of *N*-methoxy-*N*-methyl-2-phenylcyclopropanecarboxamide **4a** (30.0 mg, 0.15 mmol) in 3 mL THF, was added PhMgBr (1 M in THF, 35  $\mu$ L, 0.45 mmol) at 0 °C. After stirring for 2 h at 0 °C, the reaction was quenched by adding excess amount of saturated NH<sub>4</sub>Cl aqueous solution, followed by extraction with diethyl ether. The organic phase was washed with brine and then dried over anhydrous Na<sub>2</sub>SO<sub>4</sub>. After the solution was filtered and the solvent was evaporated under vacuum, the residue was subjected to silica gel column chromatography using petroleum Et<sub>2</sub>O/EtOAc (10/1 (v/v)) as eluent to give the corresponding ketone (89% yield, 90% *trans* ee). <sup>1</sup>H NMR (500 MHz, CDCl<sub>3</sub>) (*trans* isomer)  $\delta$  1.52-1.57 (m, 1H), 1.89-1.94 (m, 1H), 2.66-2.71 (m, 1H), 2.87-2.91 (m, 1H), 7.16-7.32 (m, 5H), 7.40-7.47 (m, 3H), 7.97-7.99 (m, 2H) ppm. <sup>13</sup>C NMR (125 MHz, CDCl<sub>3</sub>) (*trans* isomer)  $\delta$  19.37, 29.41, 30.13, 126.32, 126.70, 128.09, 128.67, 133.02, 137.80, 140.58, 198.69 ppm.<sup>4</sup> The ee value was determined by HPLC analysis. Column (Chiral AD), UV detector 254 nm, eluent: Hex/IPA = 60/1, Flow rate = 0.5 mL/min, t<sub>R</sub> = 18.58 min (minor product), t<sub>R</sub> = 31.41 min (major product).

**References:**

1. T. Toma, J. Shimokawa, T. Fukuyama, *Org. Lett.*, 2007, **9**, 3195.
2. A. Isao, M. Atsunori, Y. Hisashi, *J. Am. Chem. Soc.*, 1985, **107**, 8254.
3. P. Jörg, C. M. Anja, W. Thorsten, W. Andreas, *Adv. Synth. Catal.*, 2003, **345**, 1273.
4. M. Olaf, W. Pablo, *Helv. Chim. Acta.*, 2003, **68**, 865.

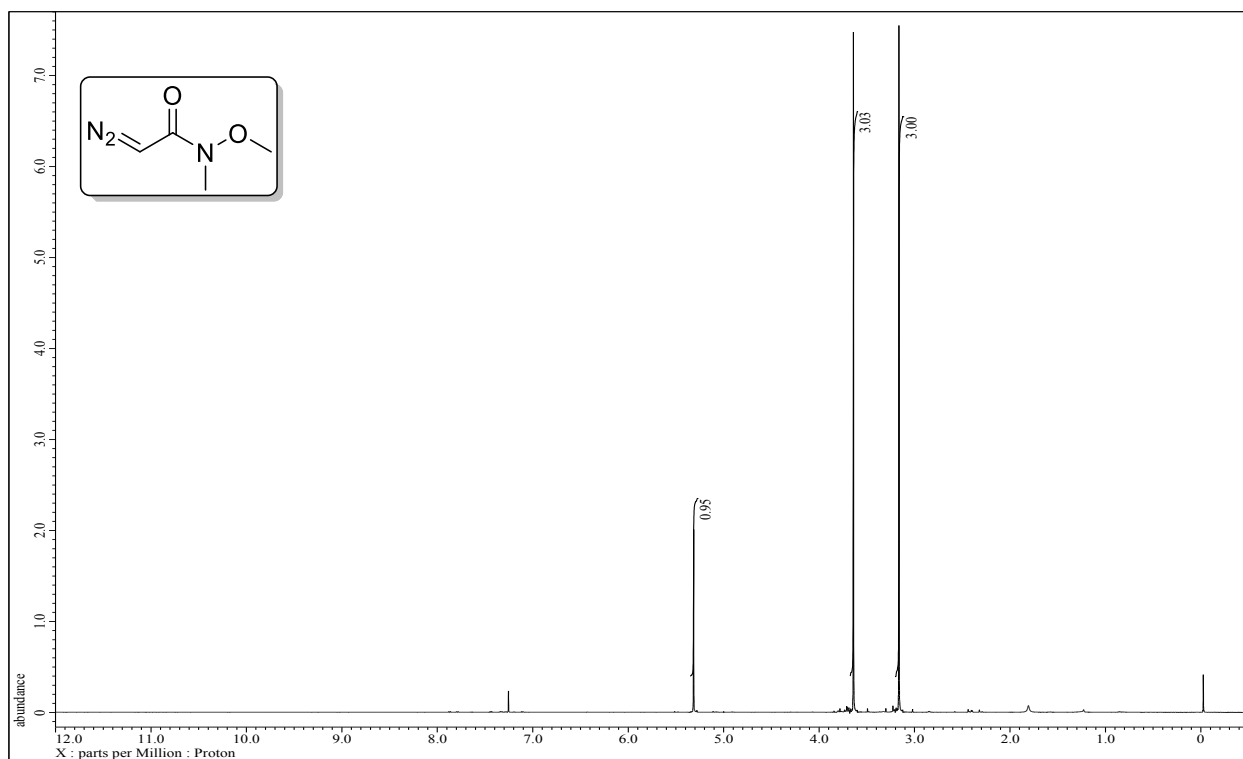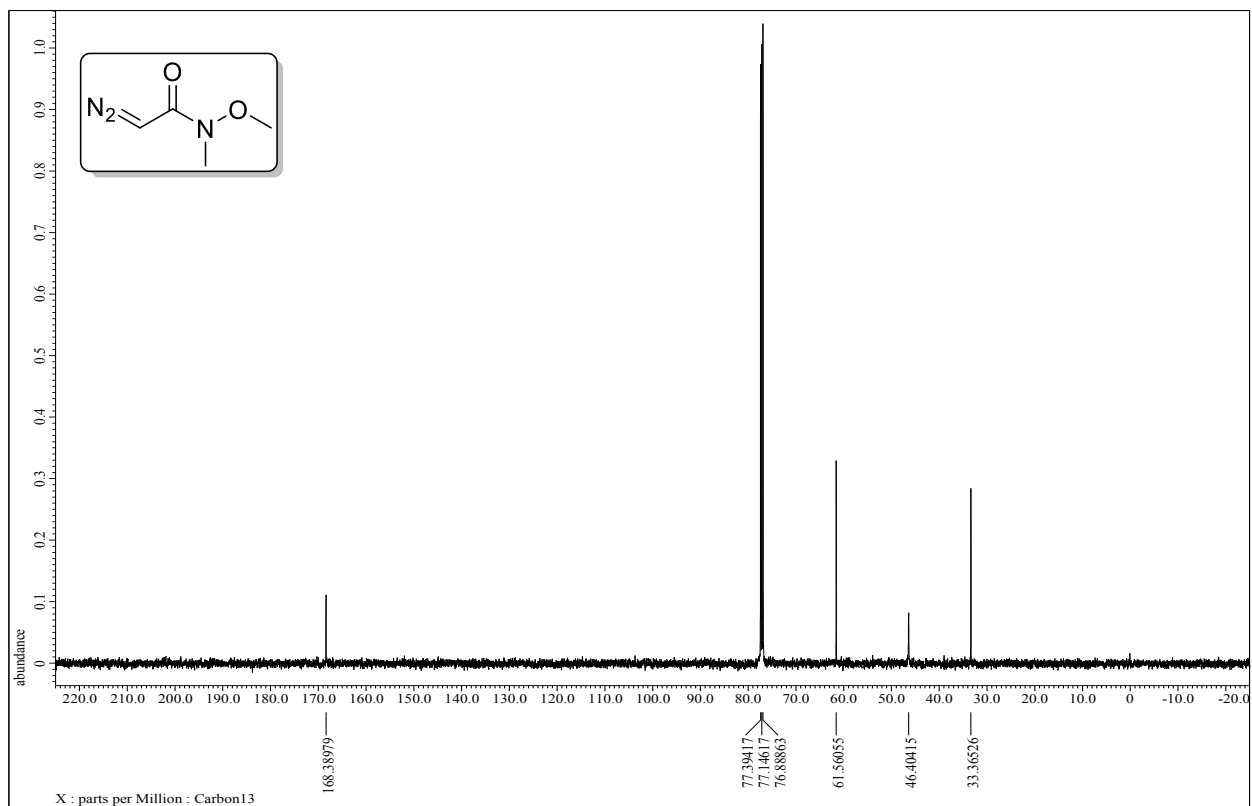

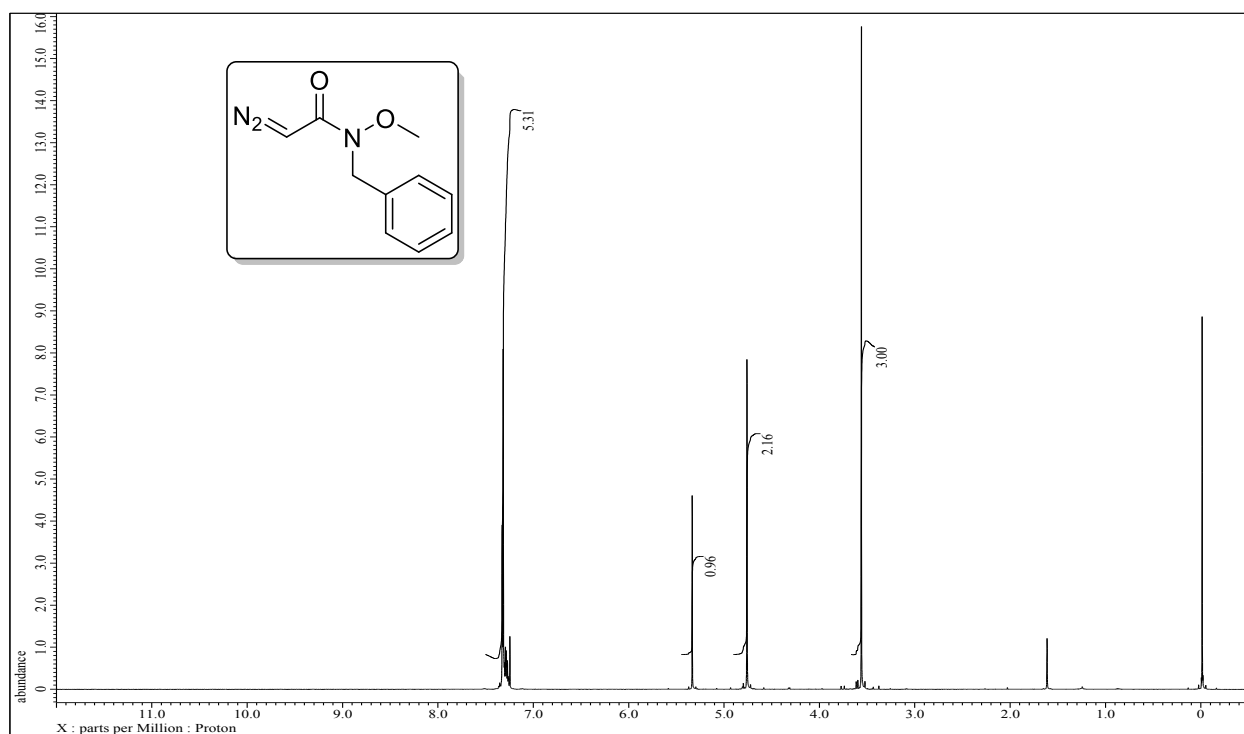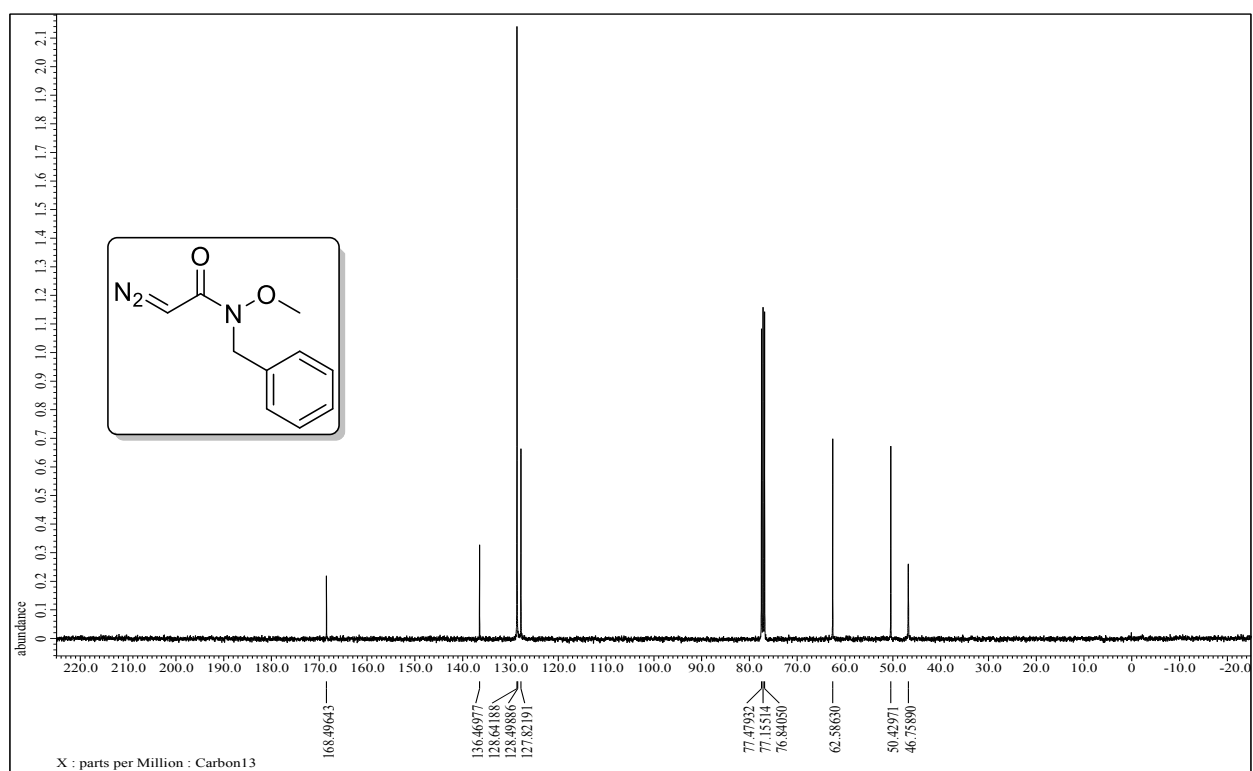

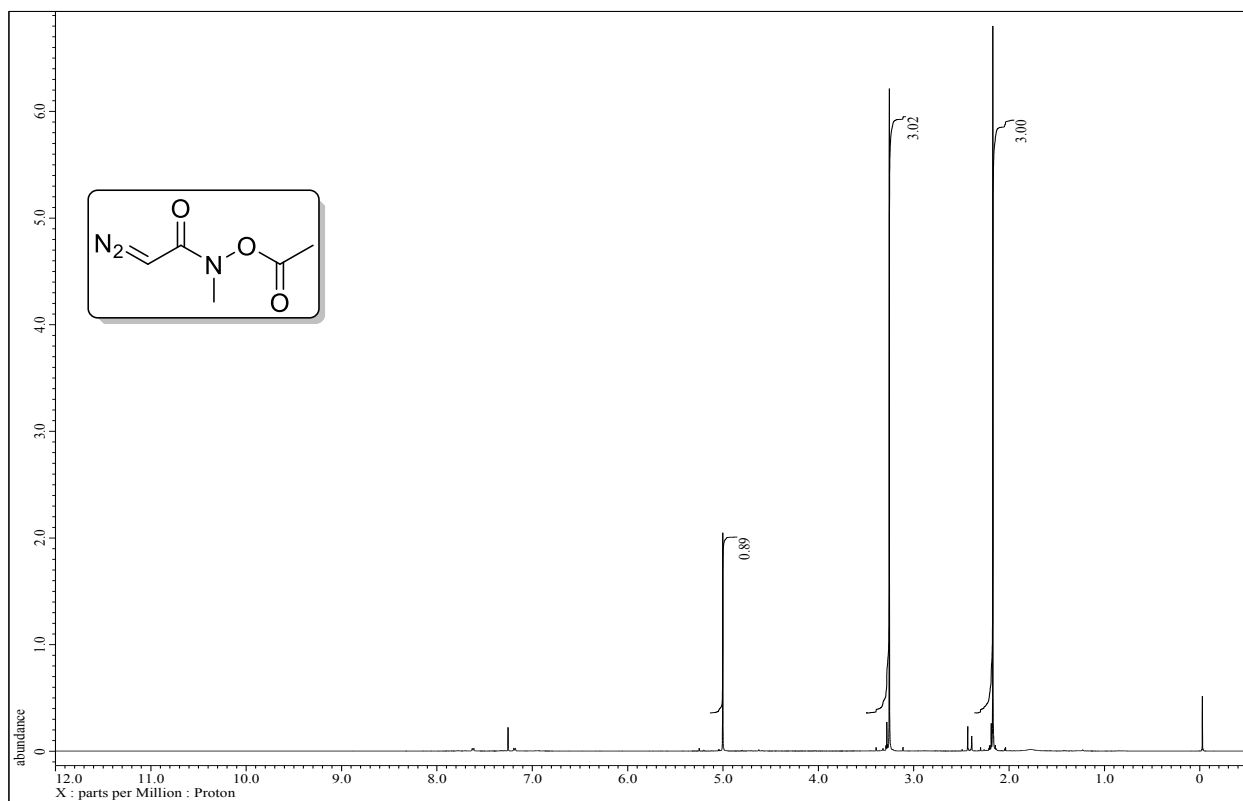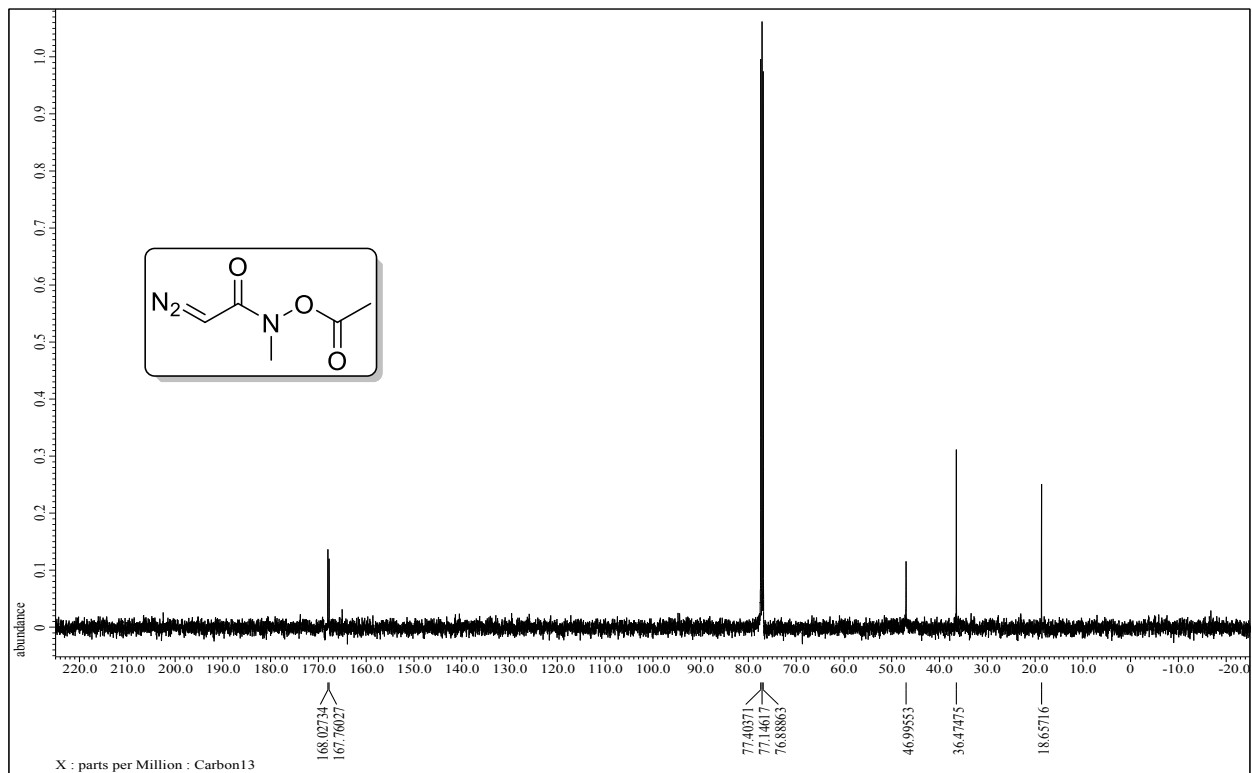

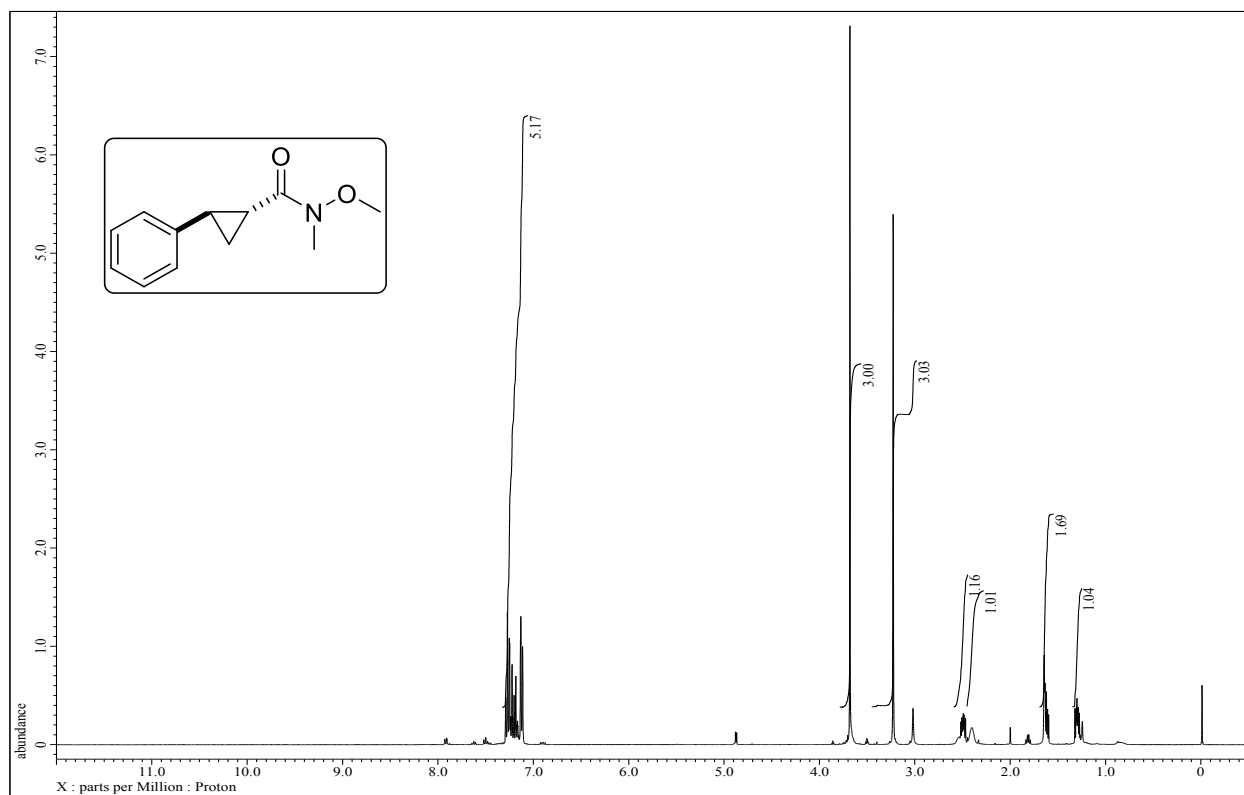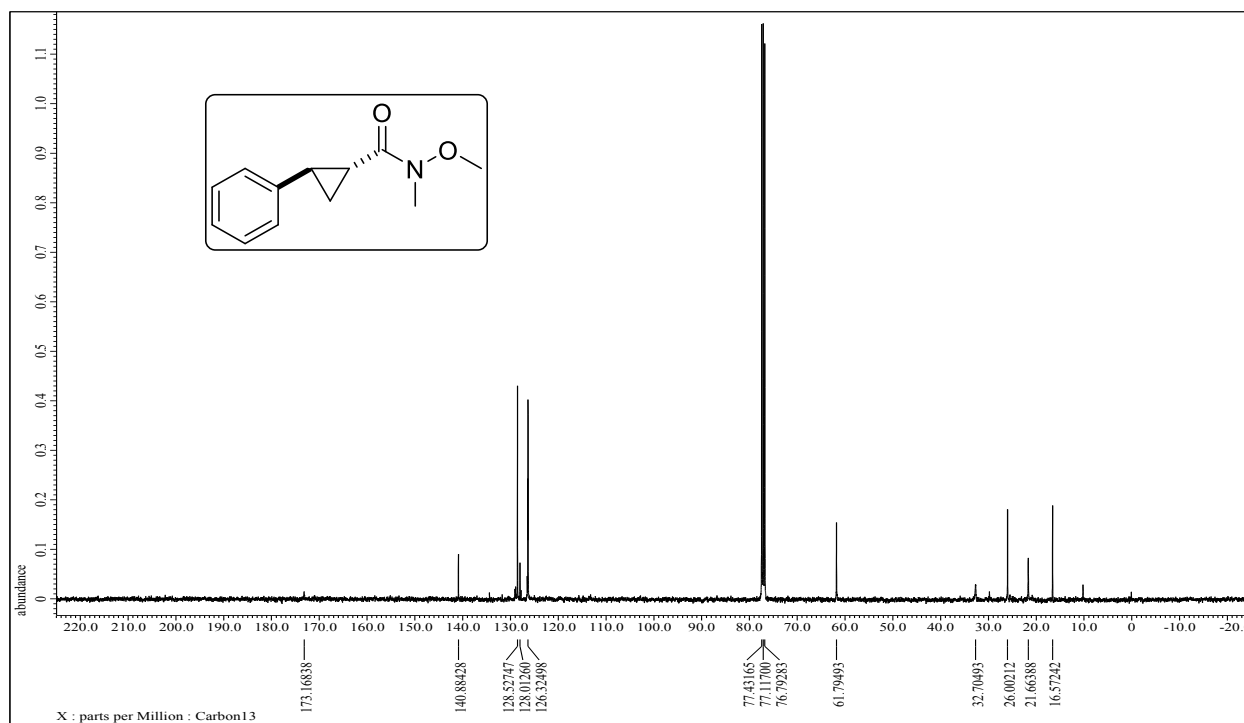

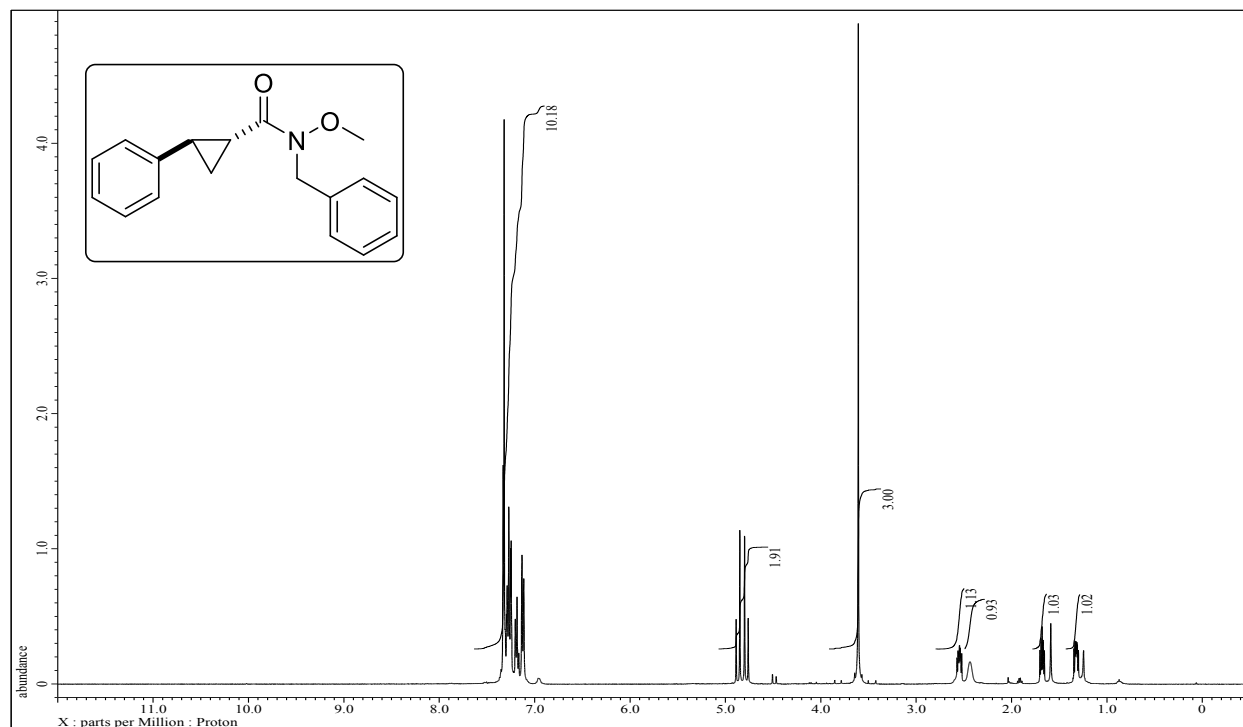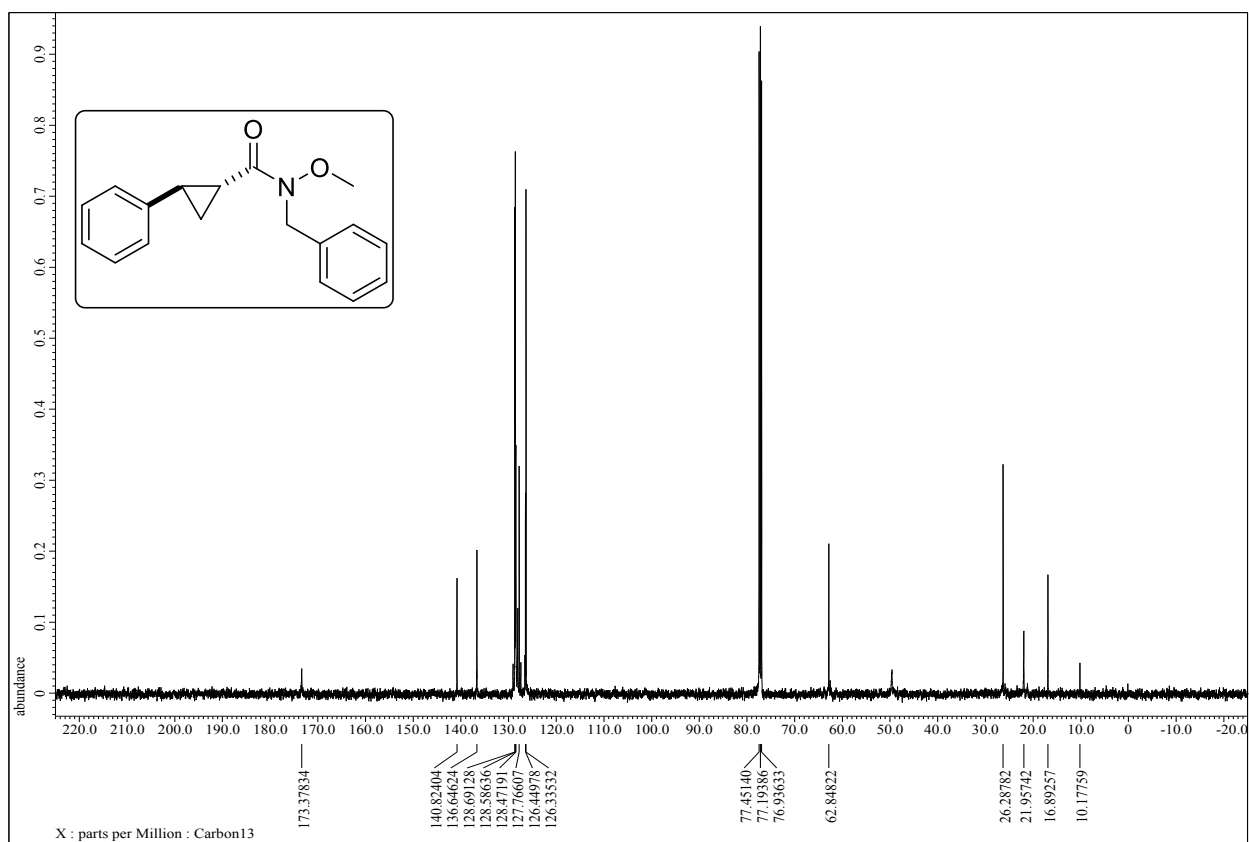



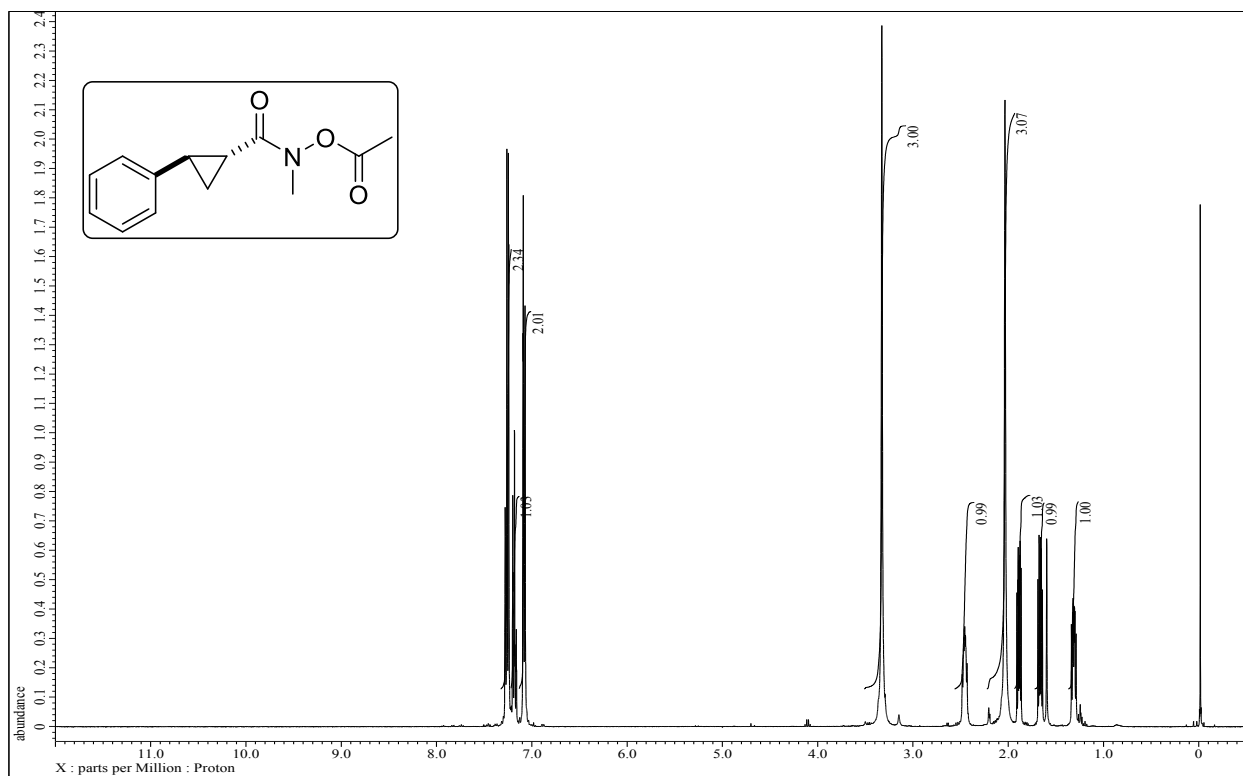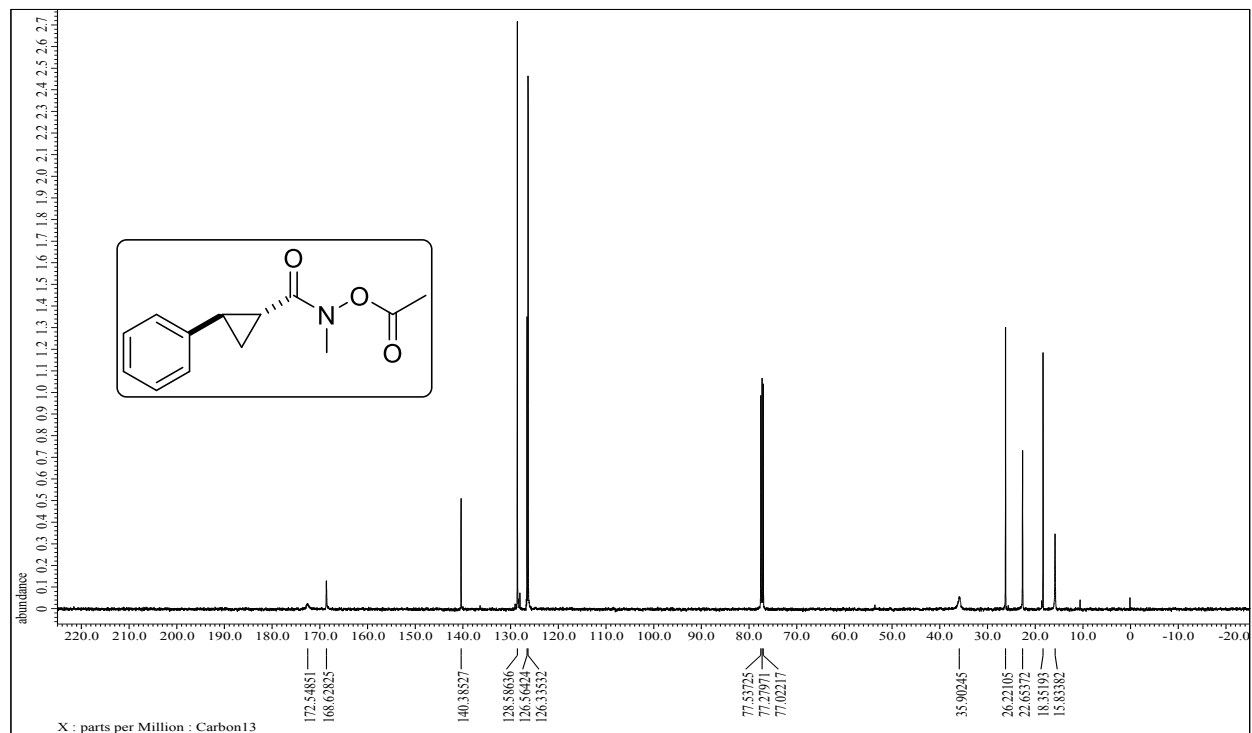

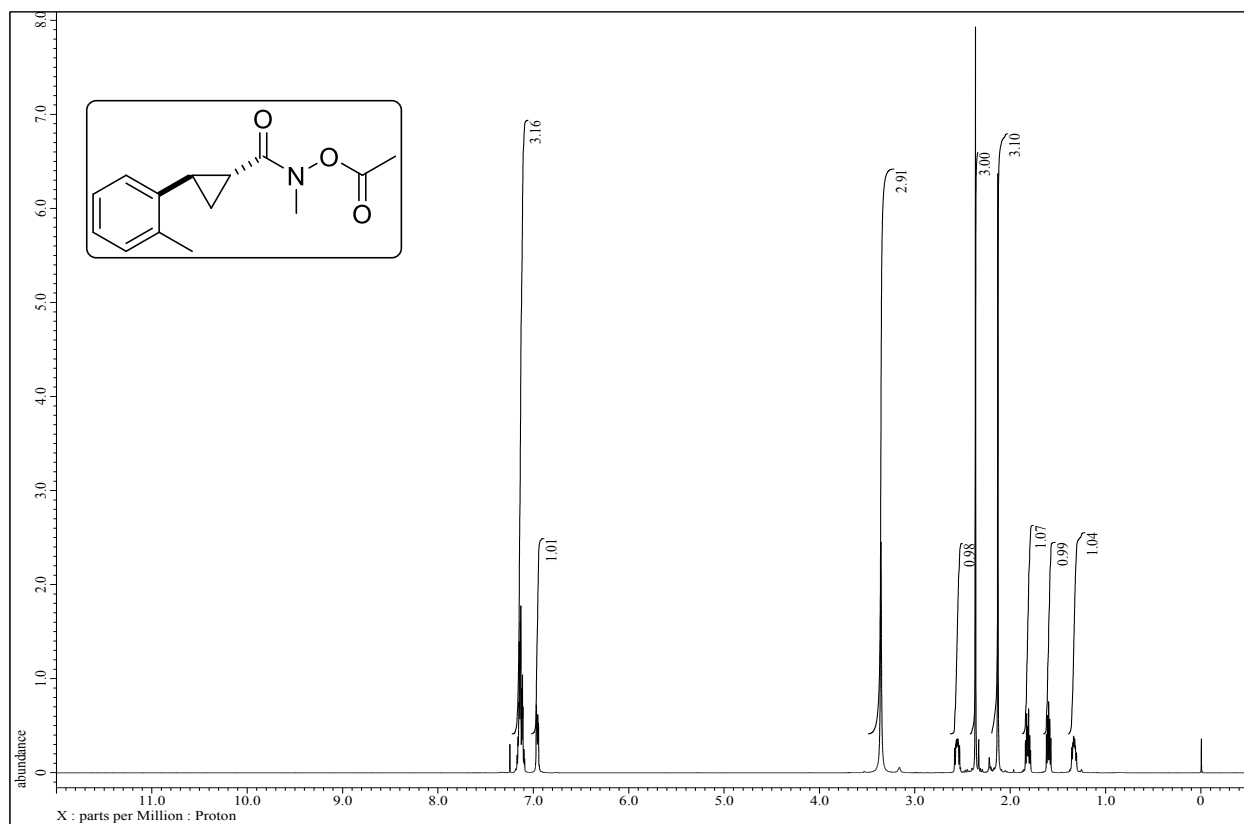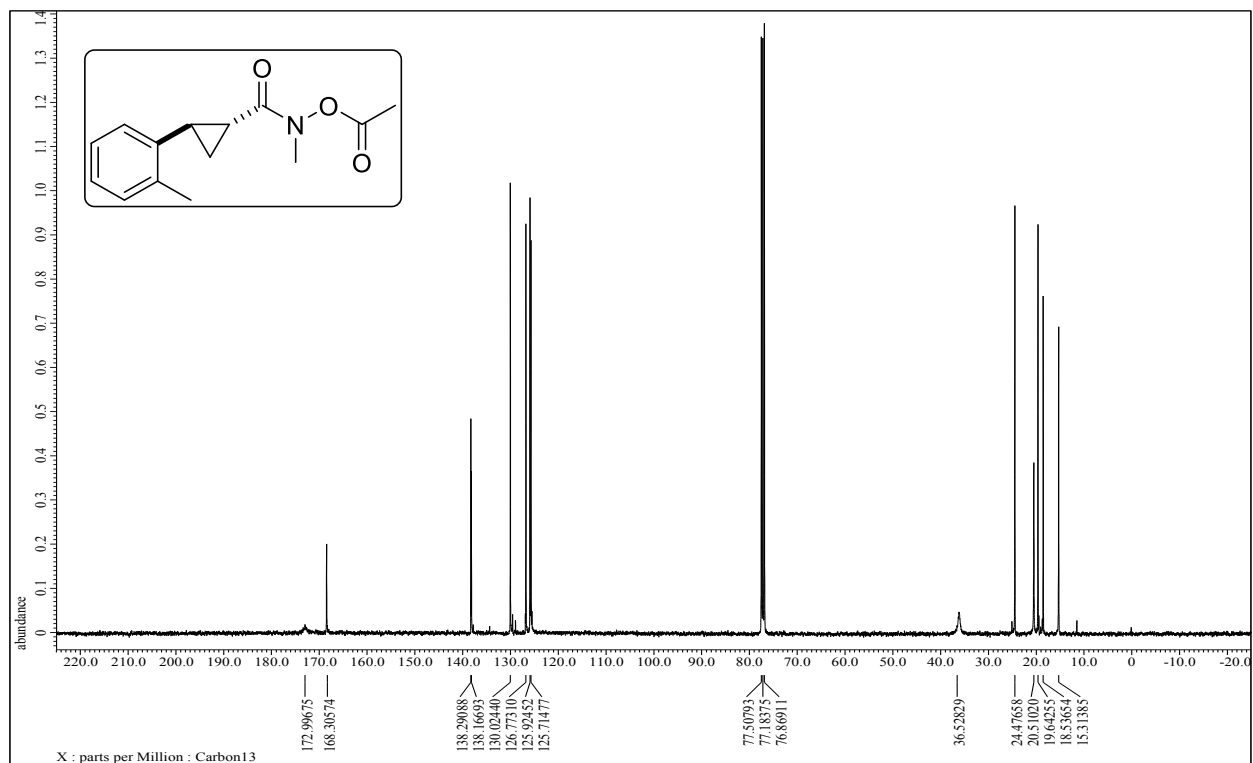

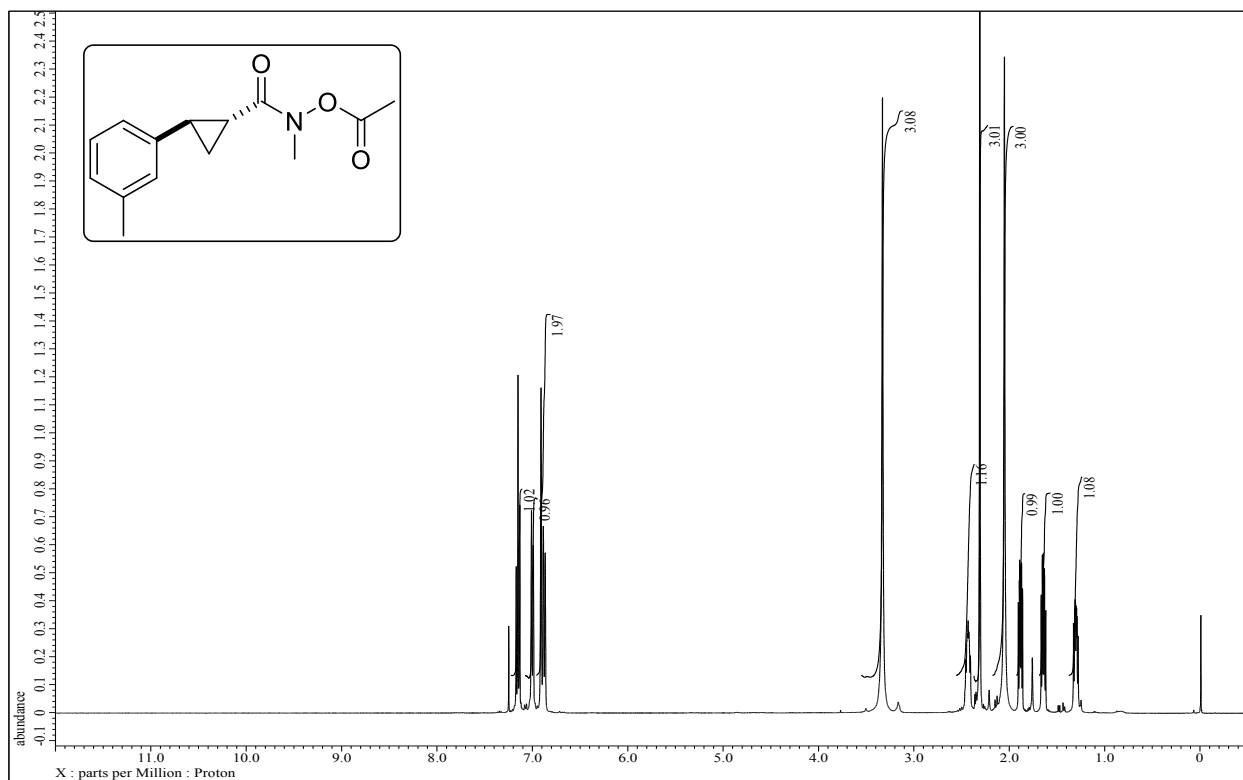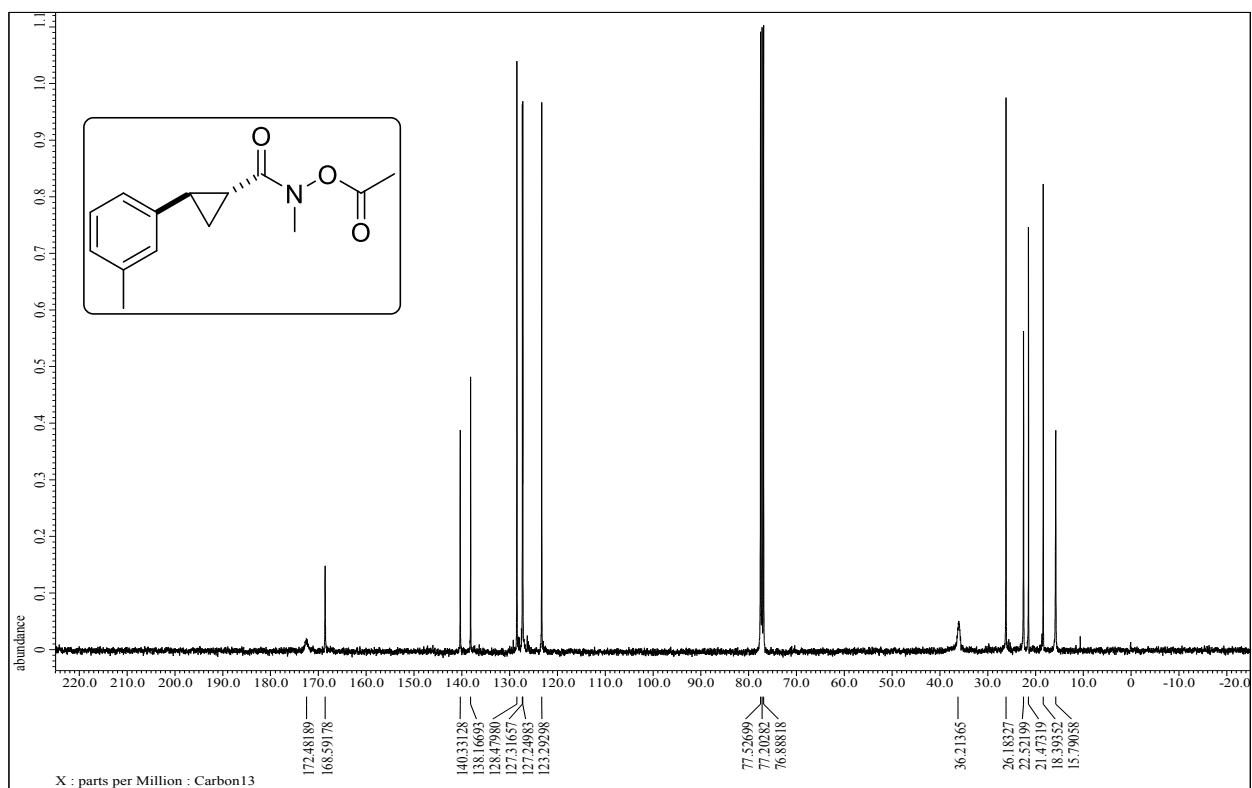

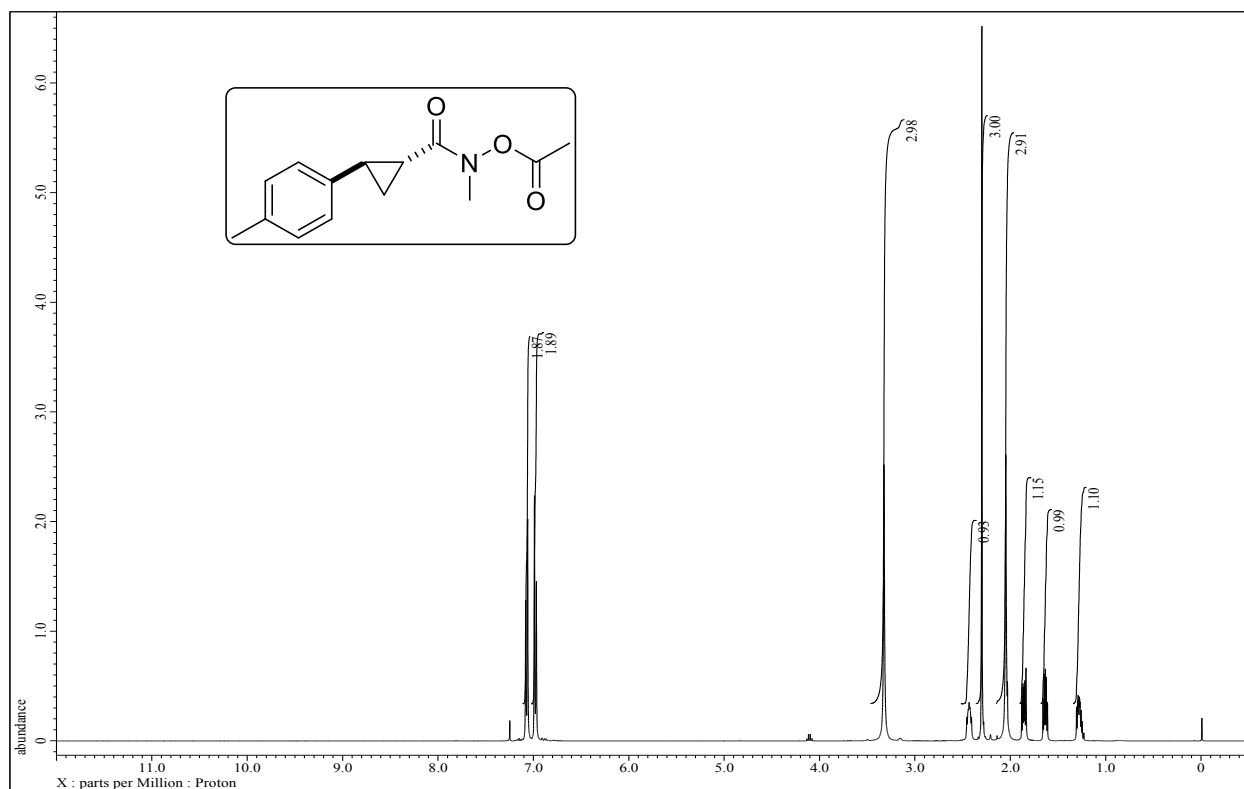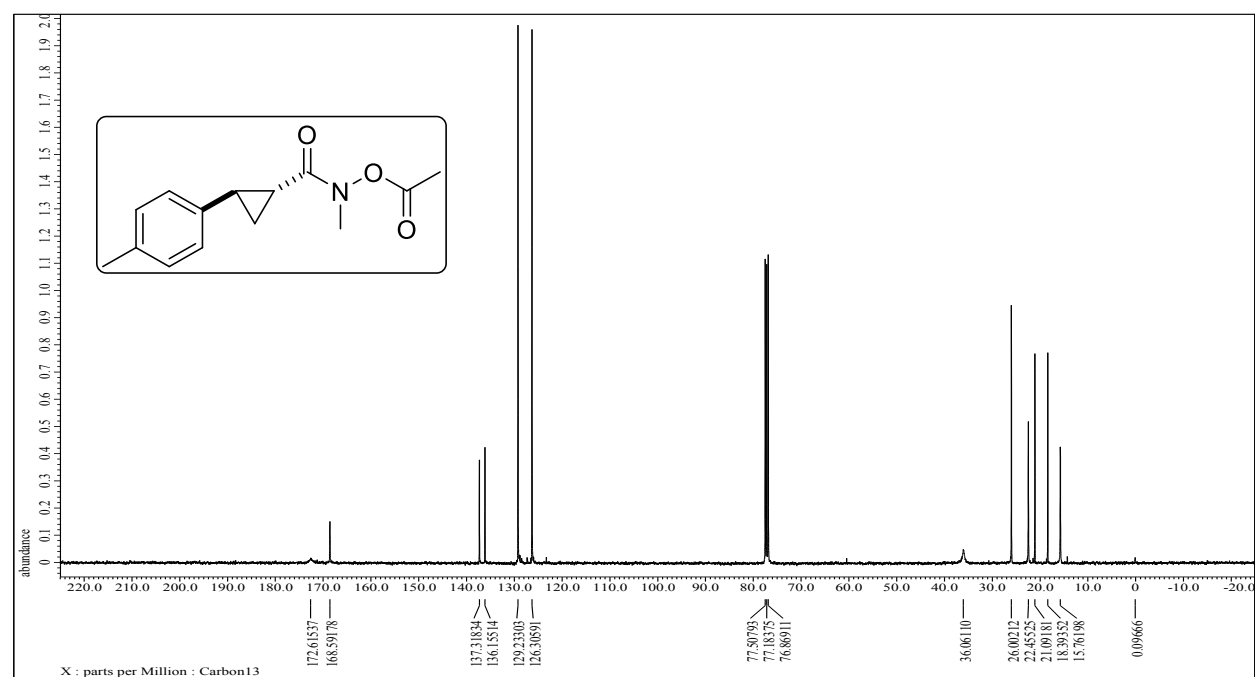

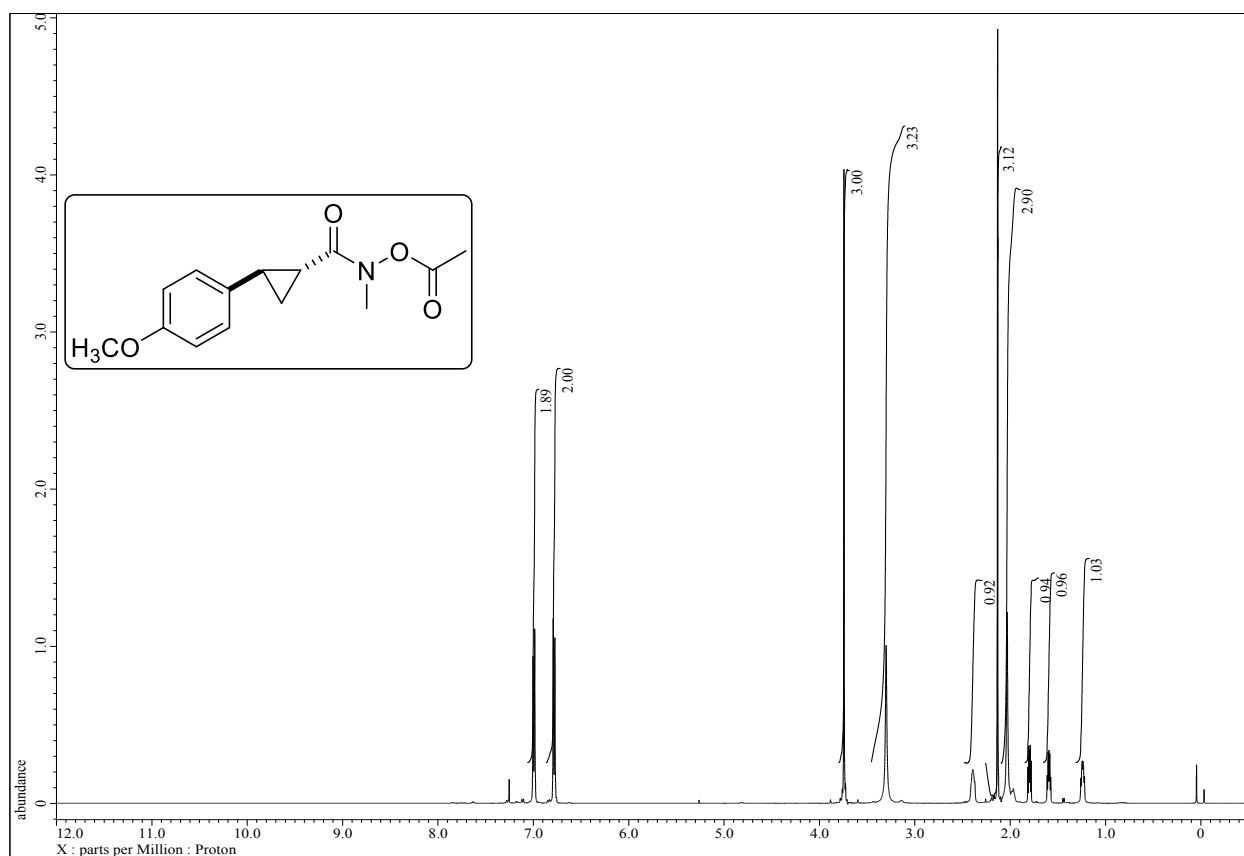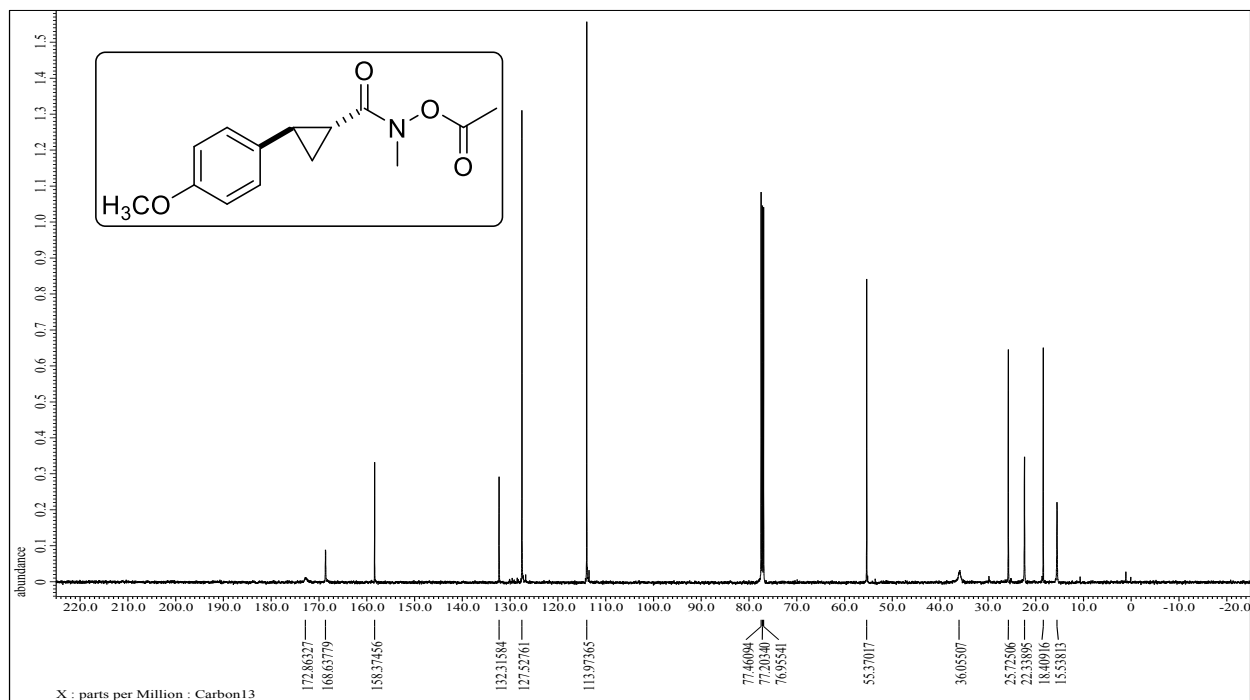

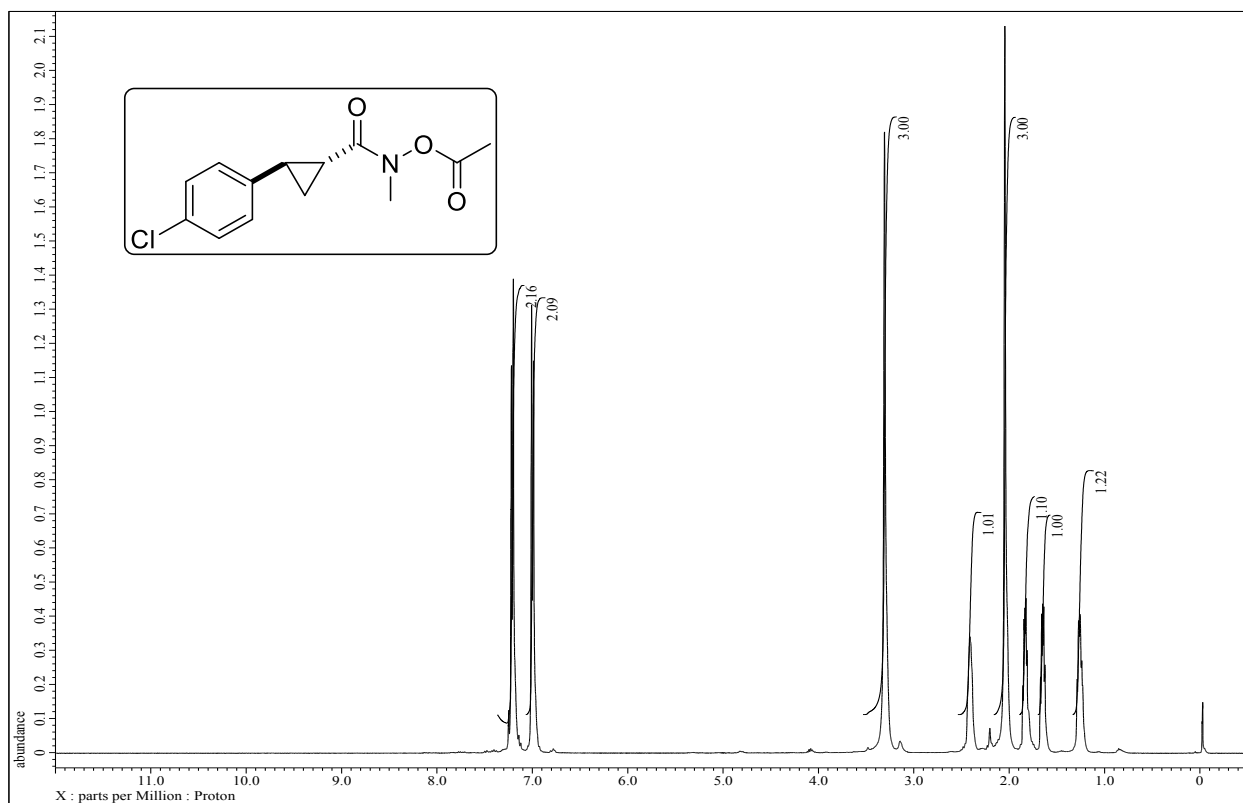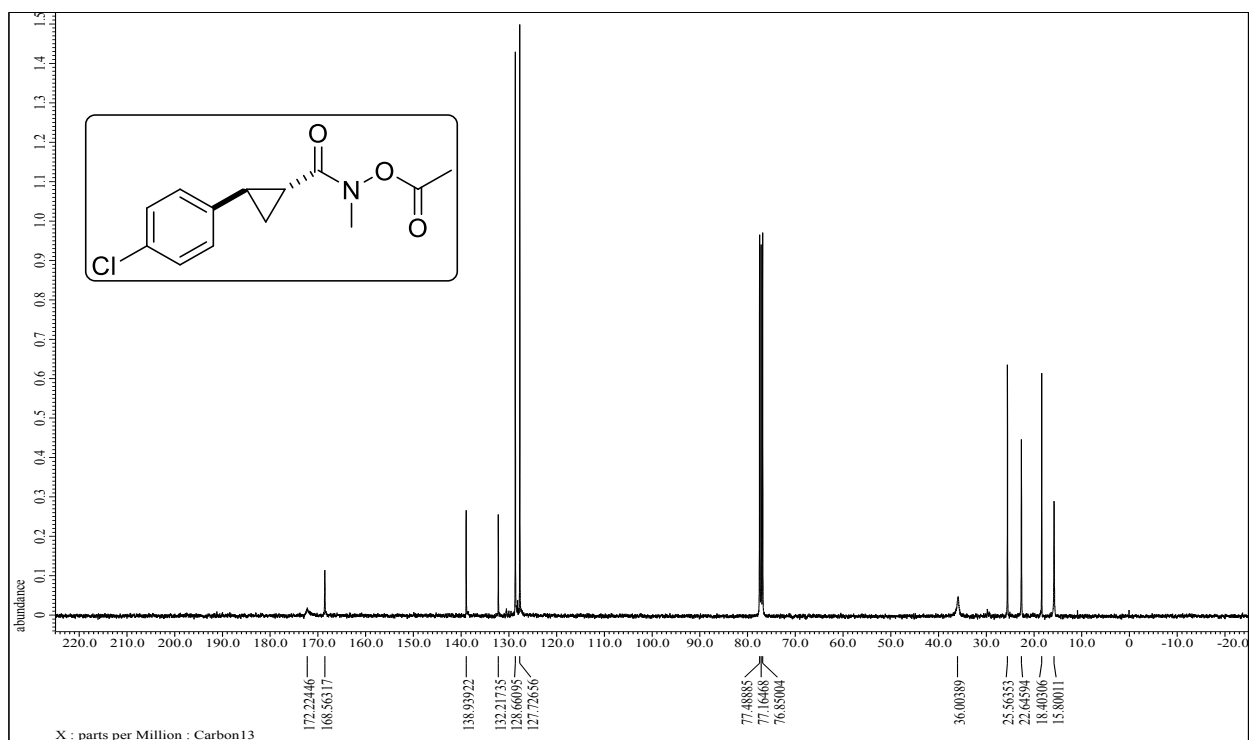

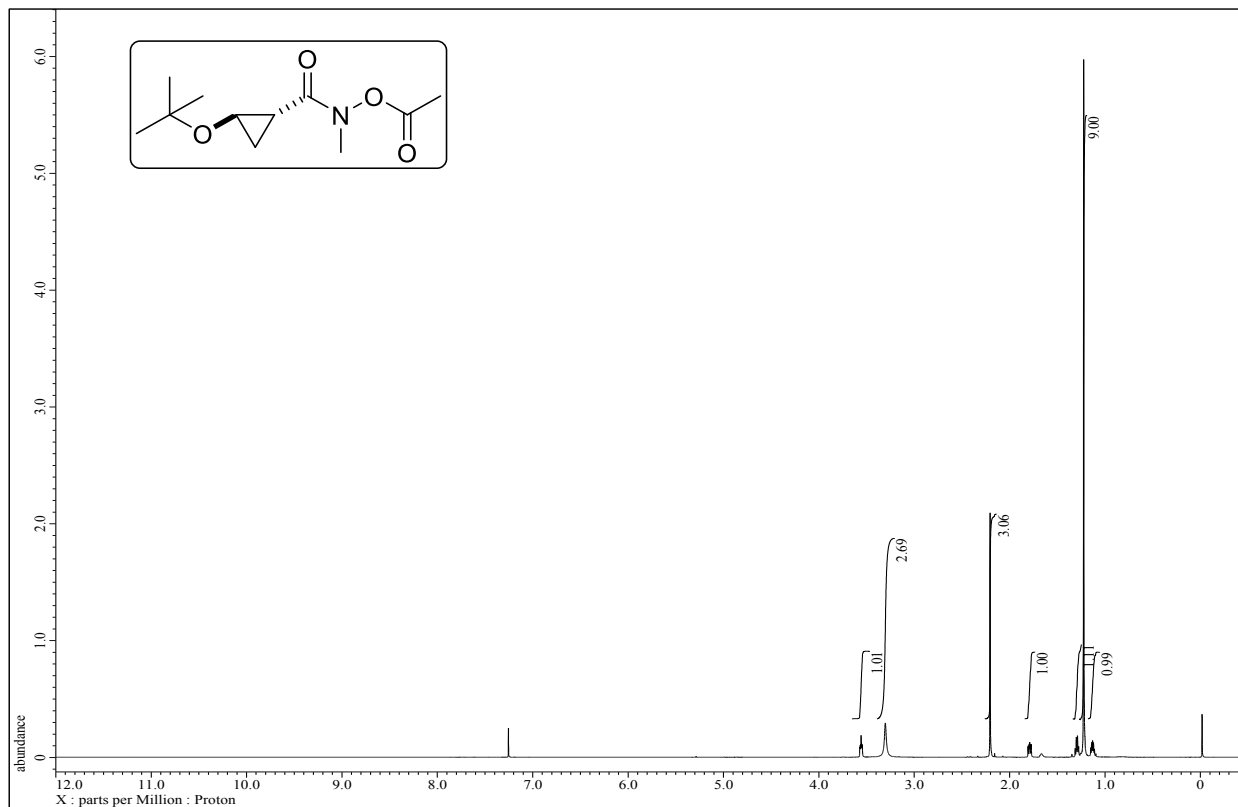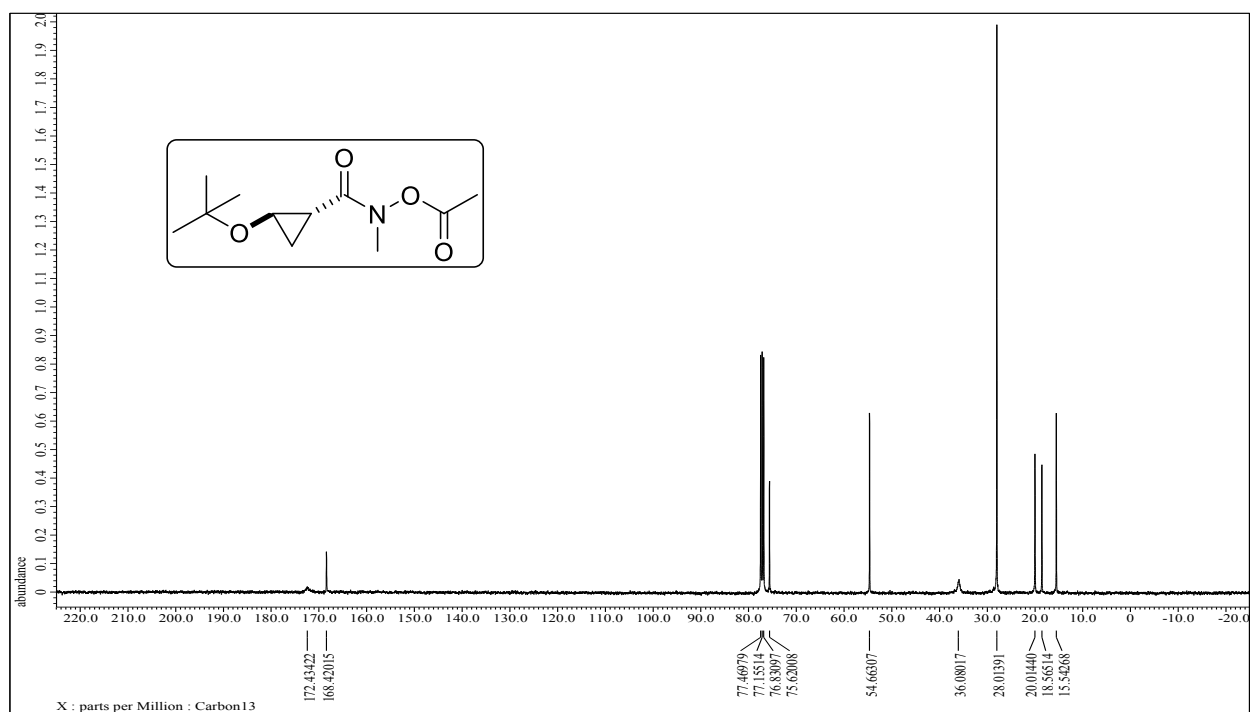

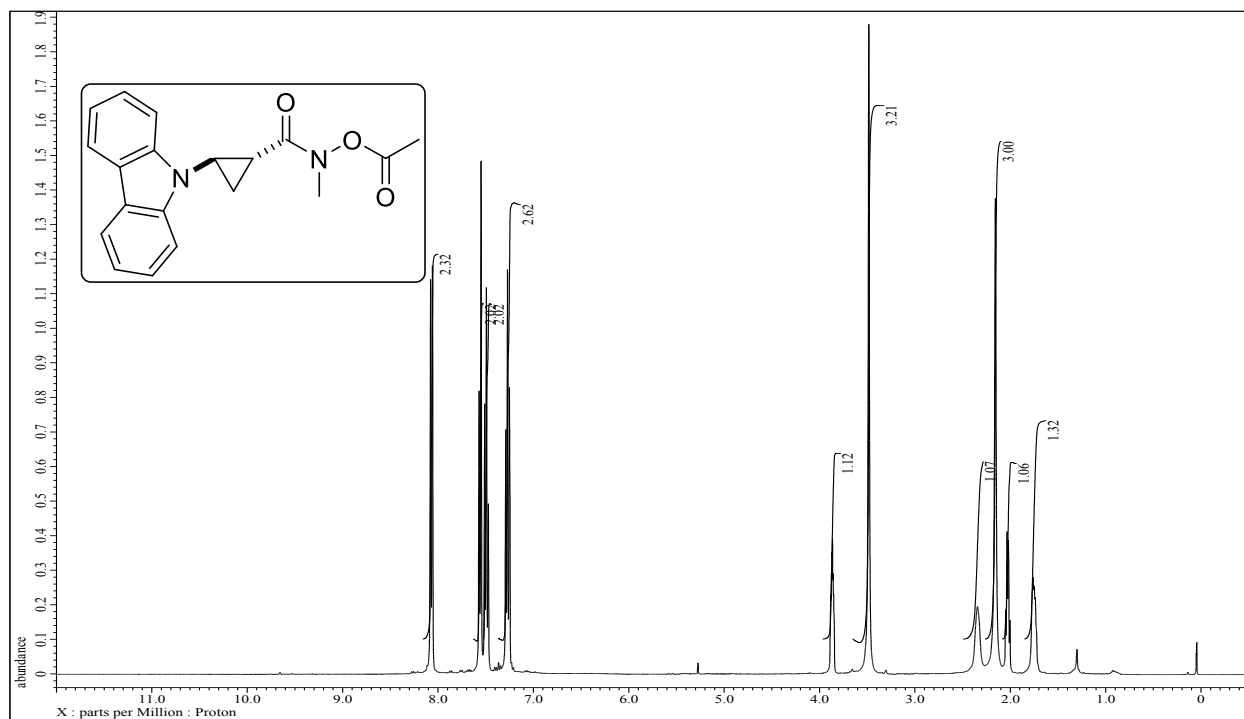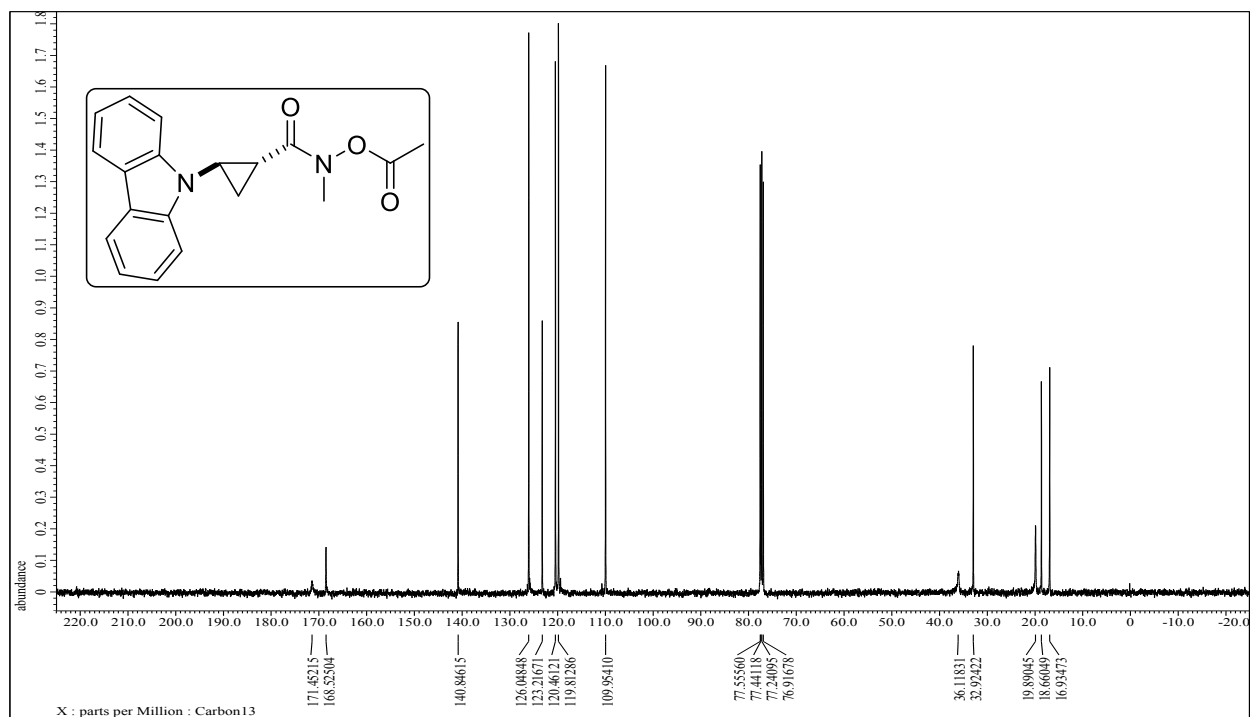



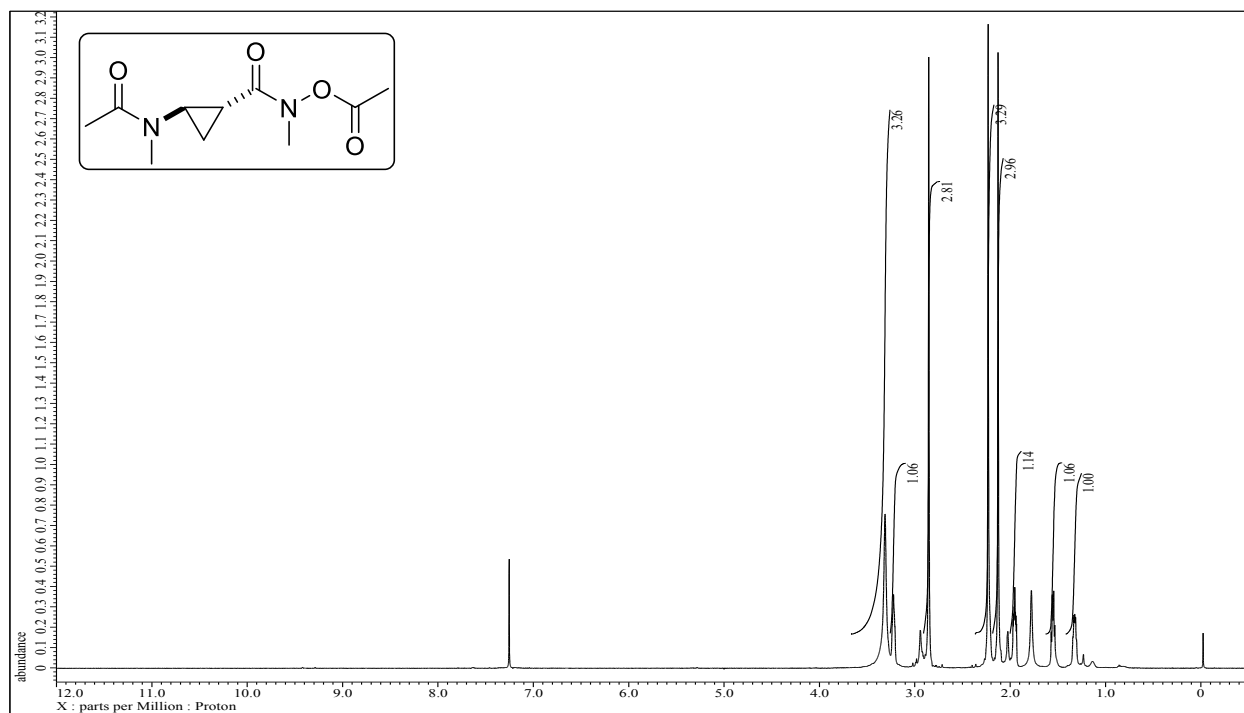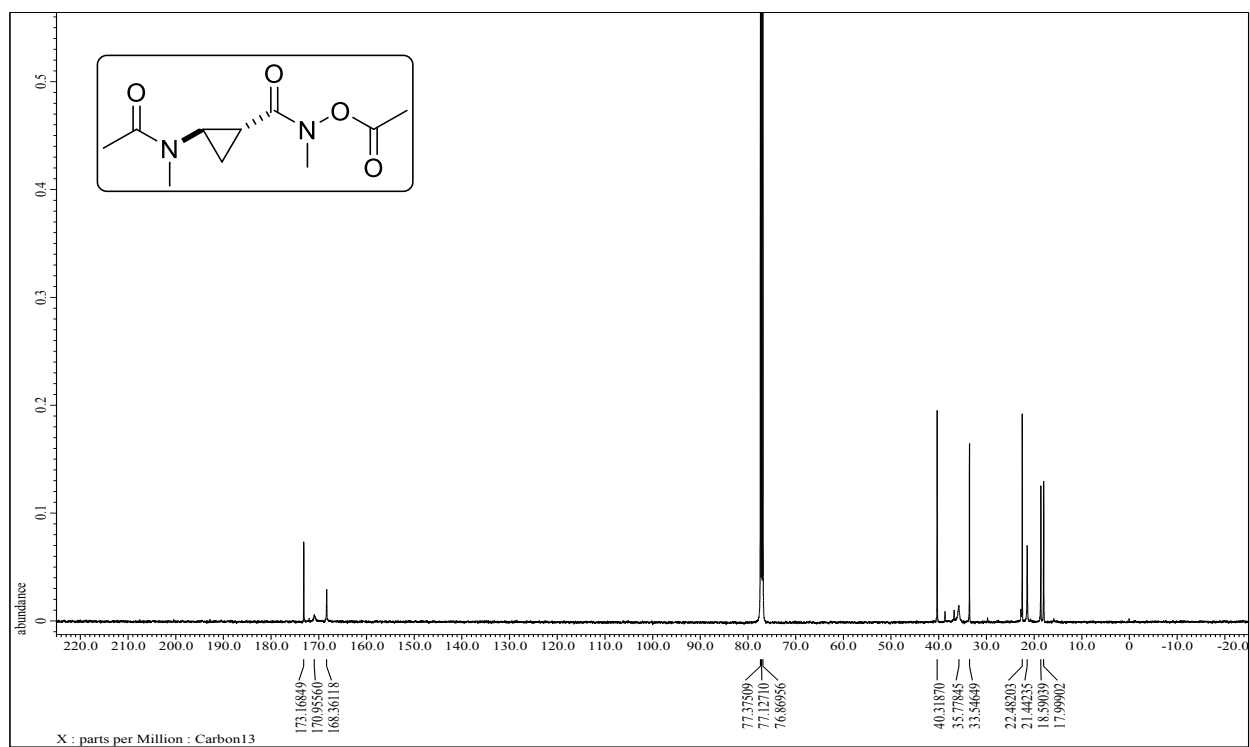

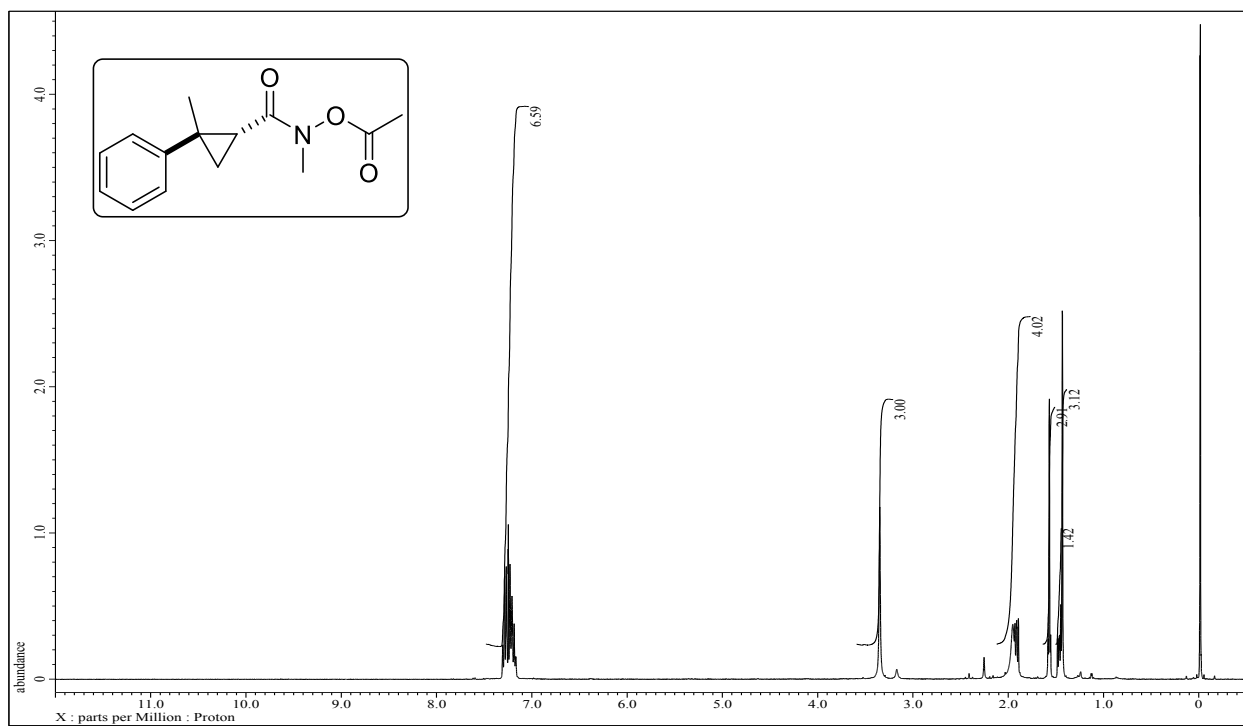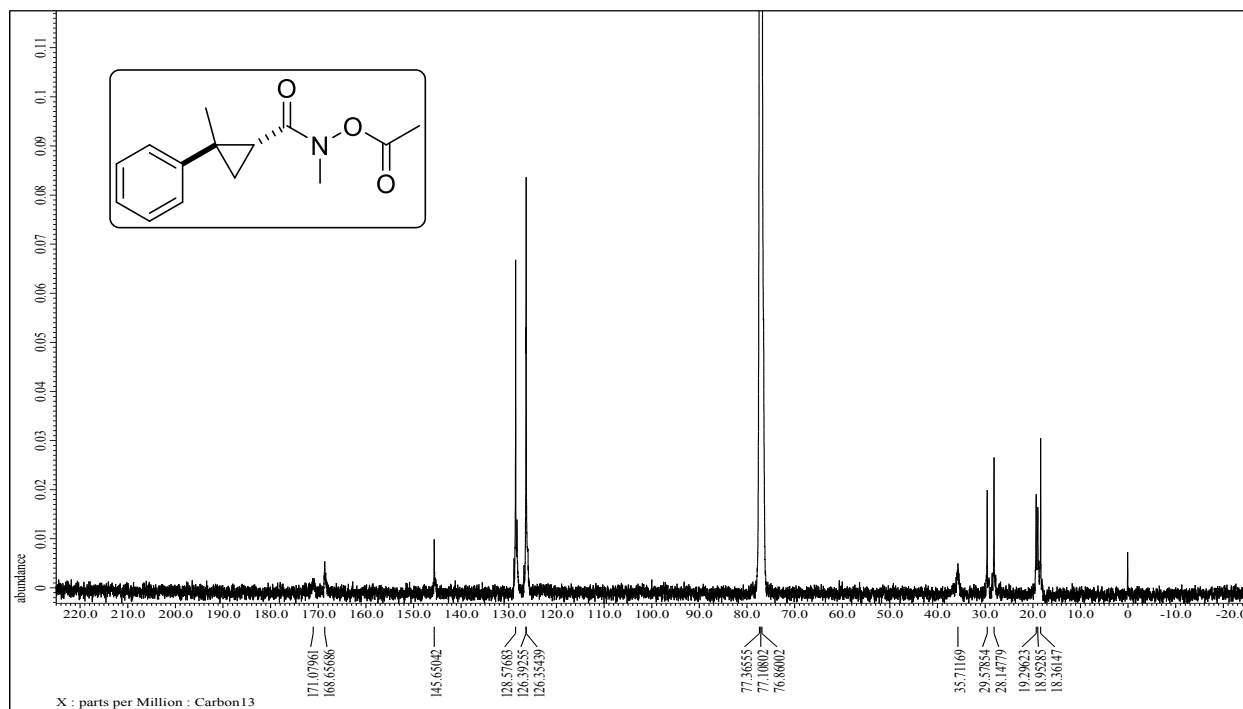

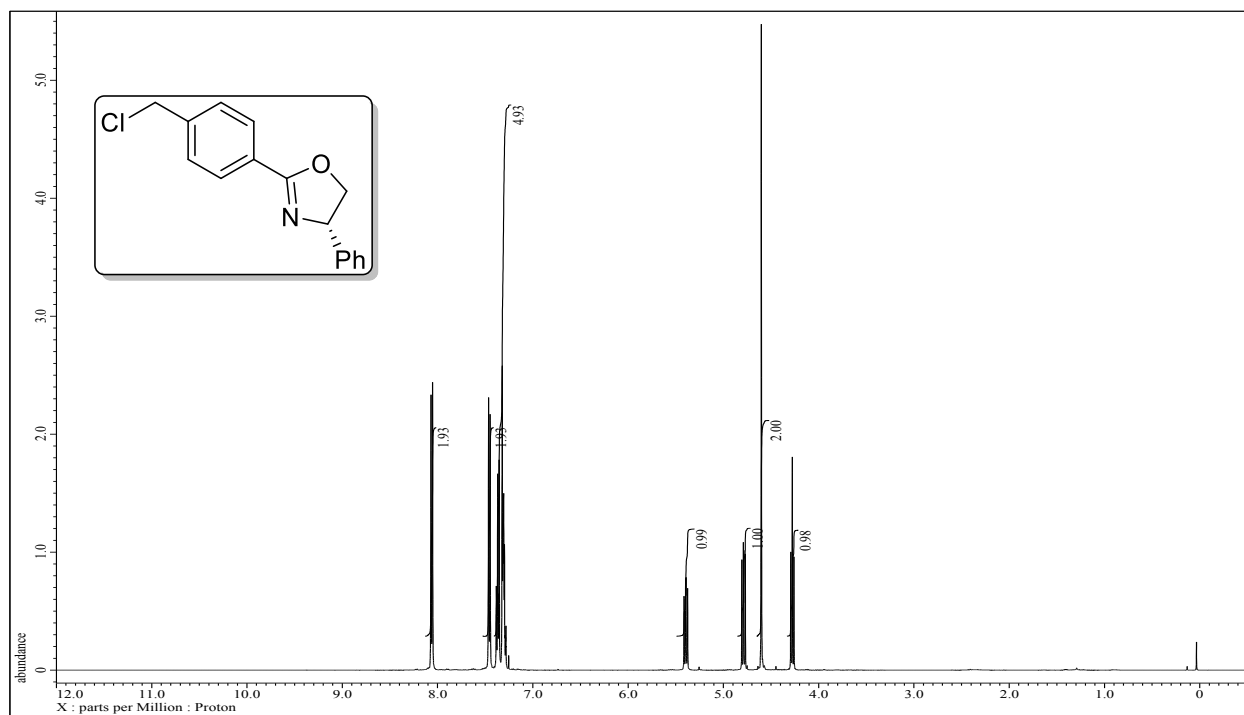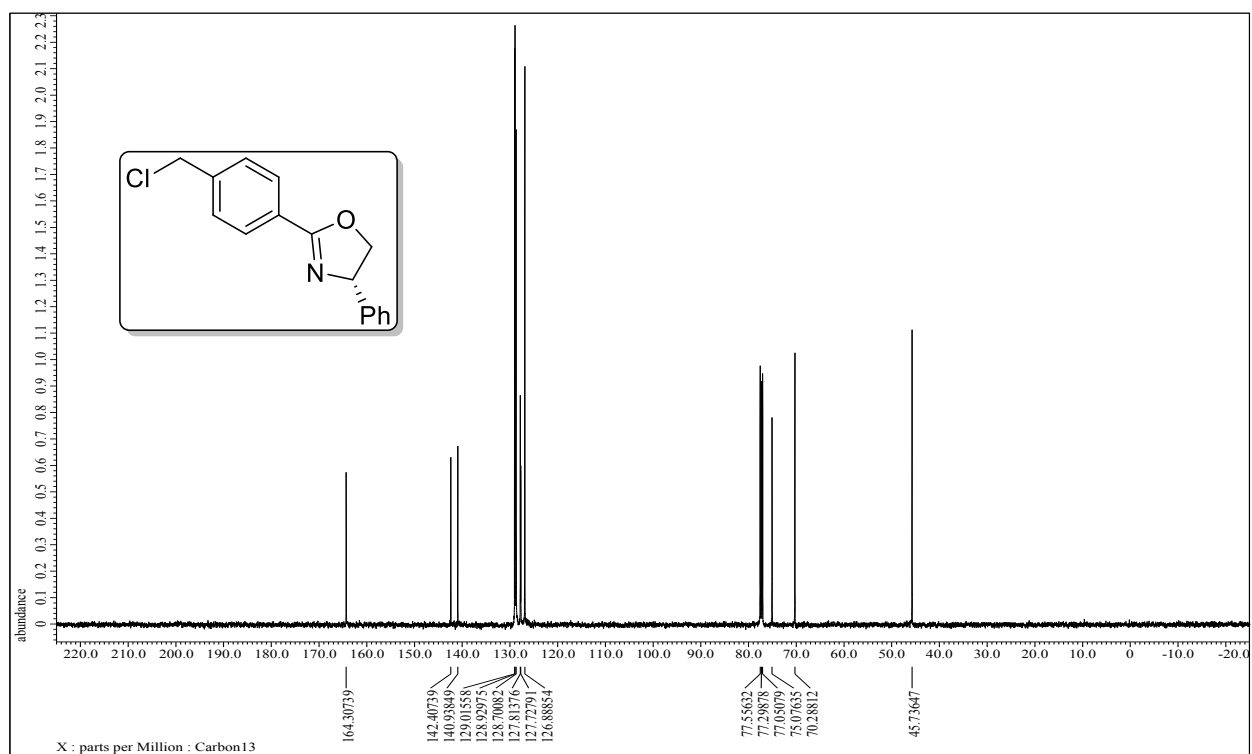

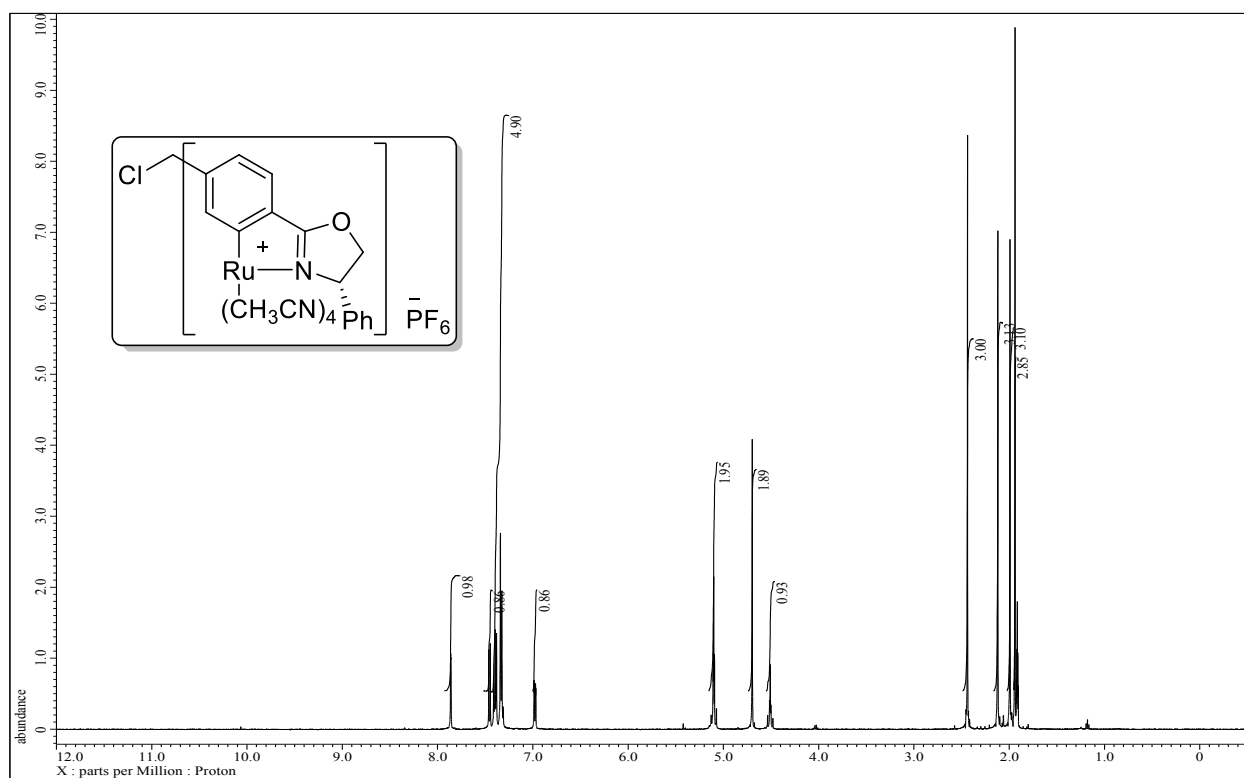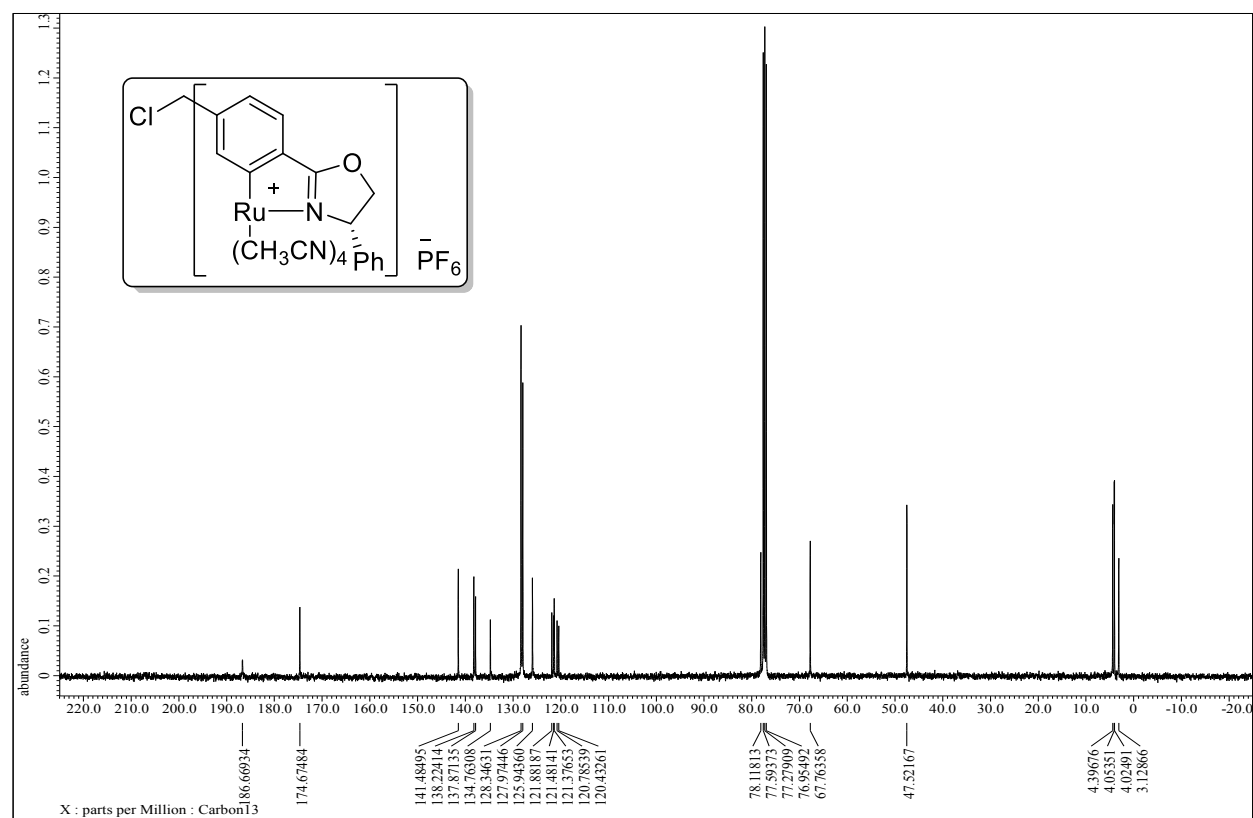

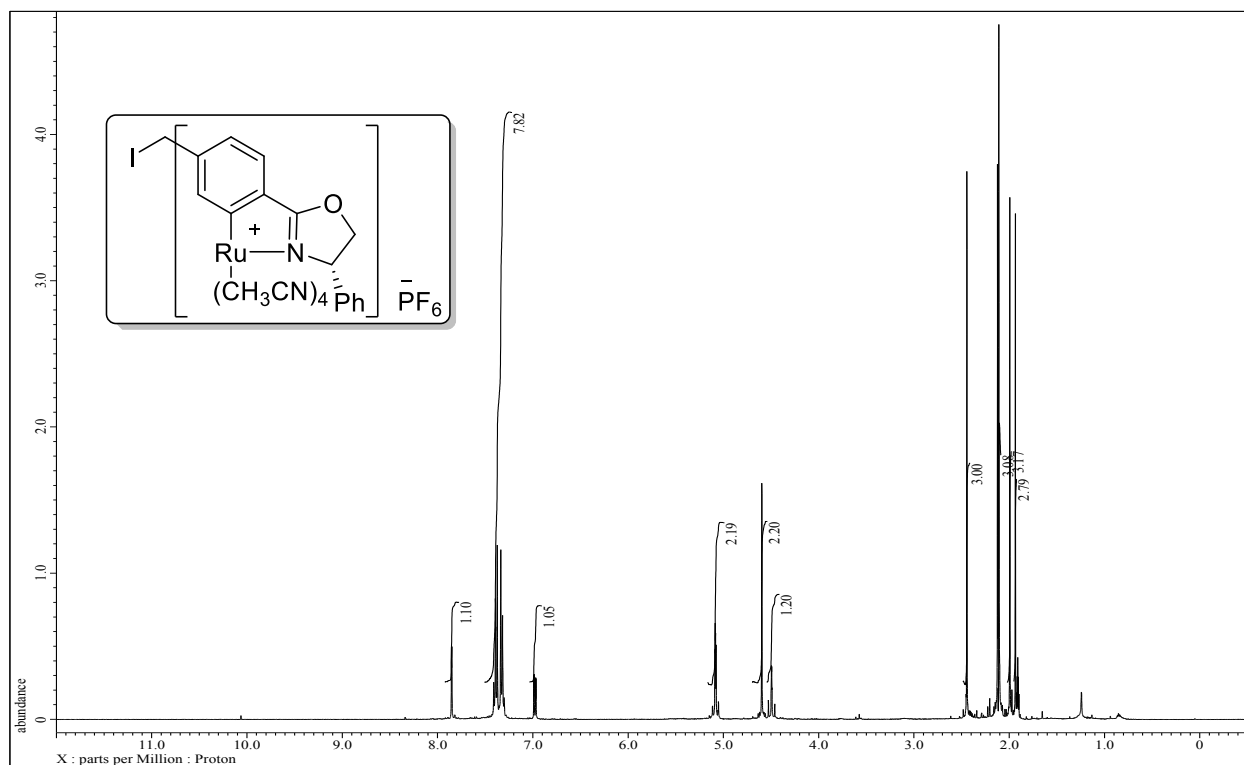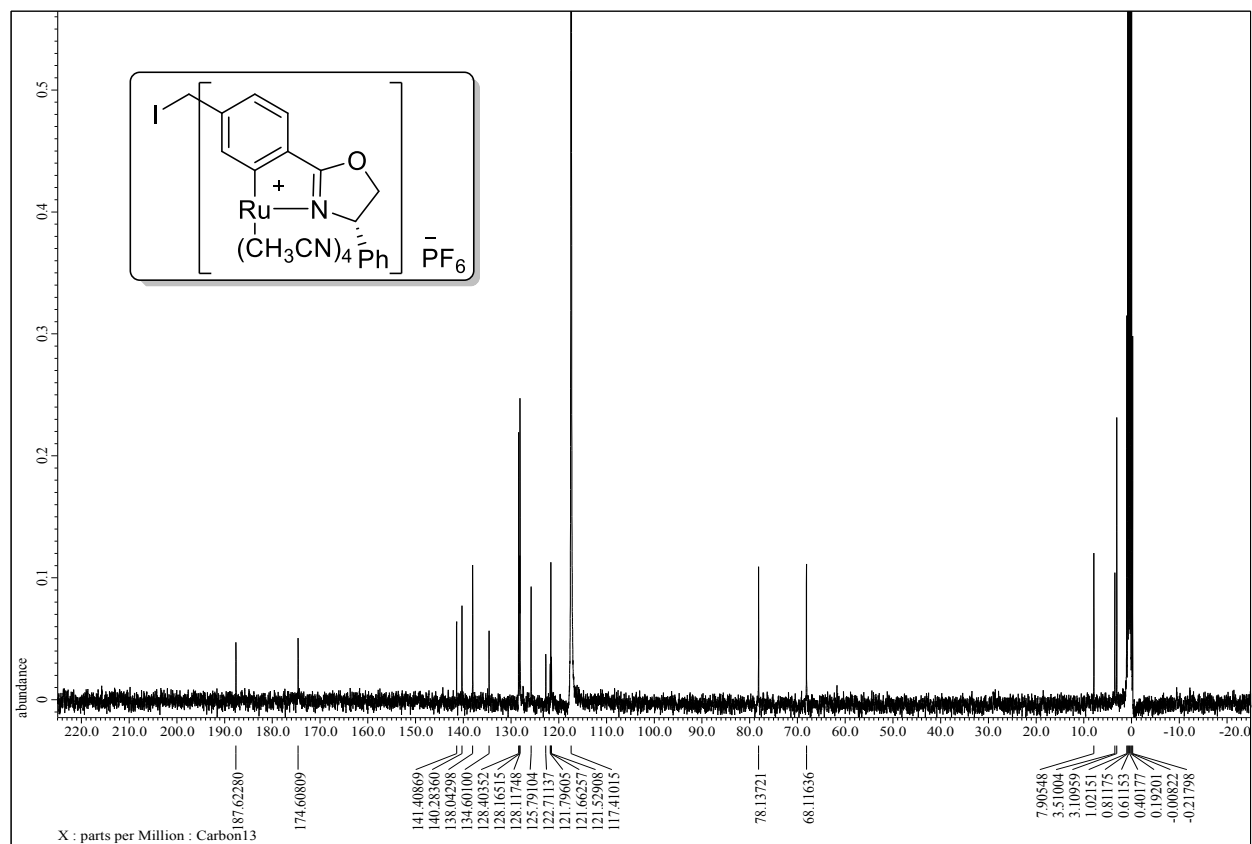

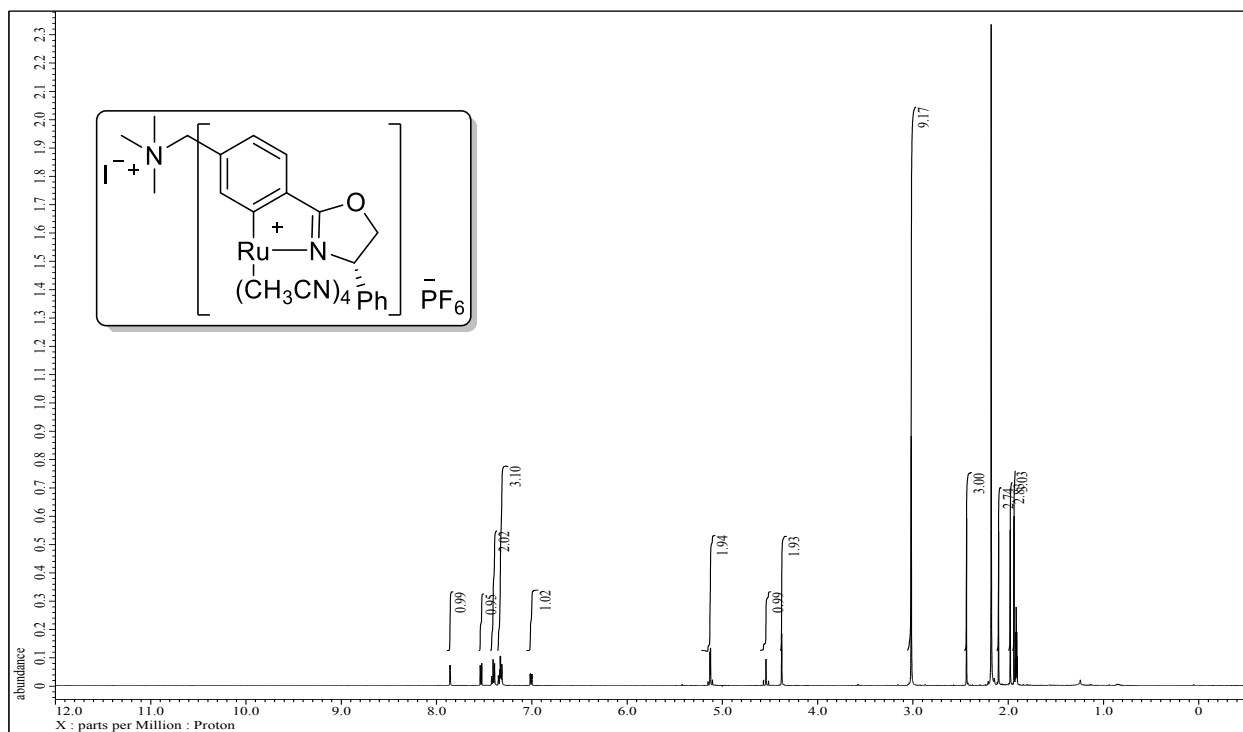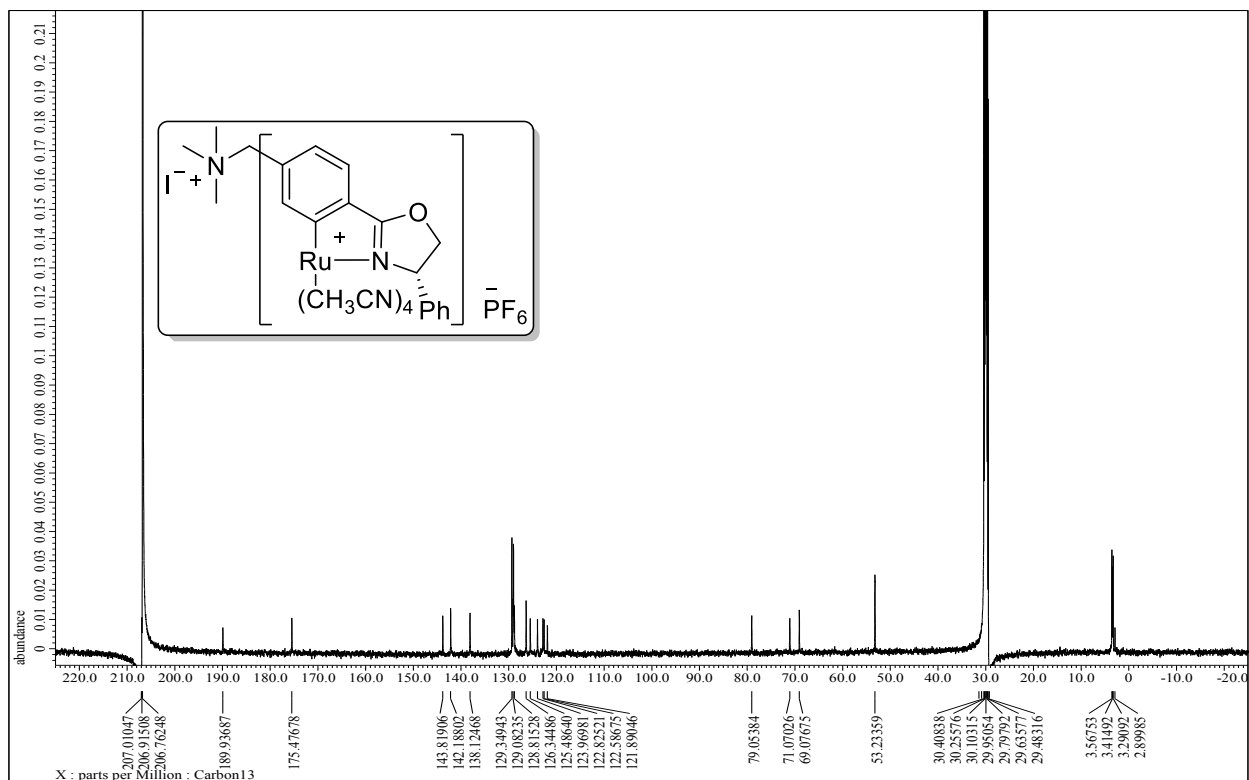

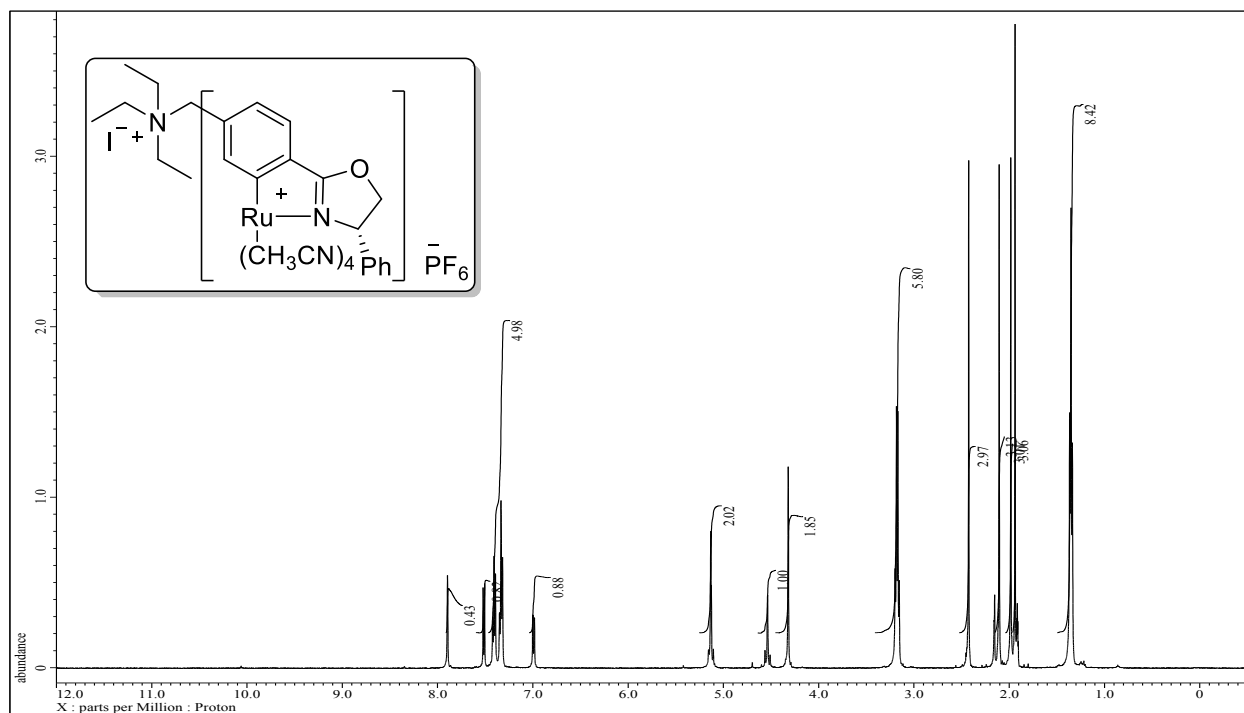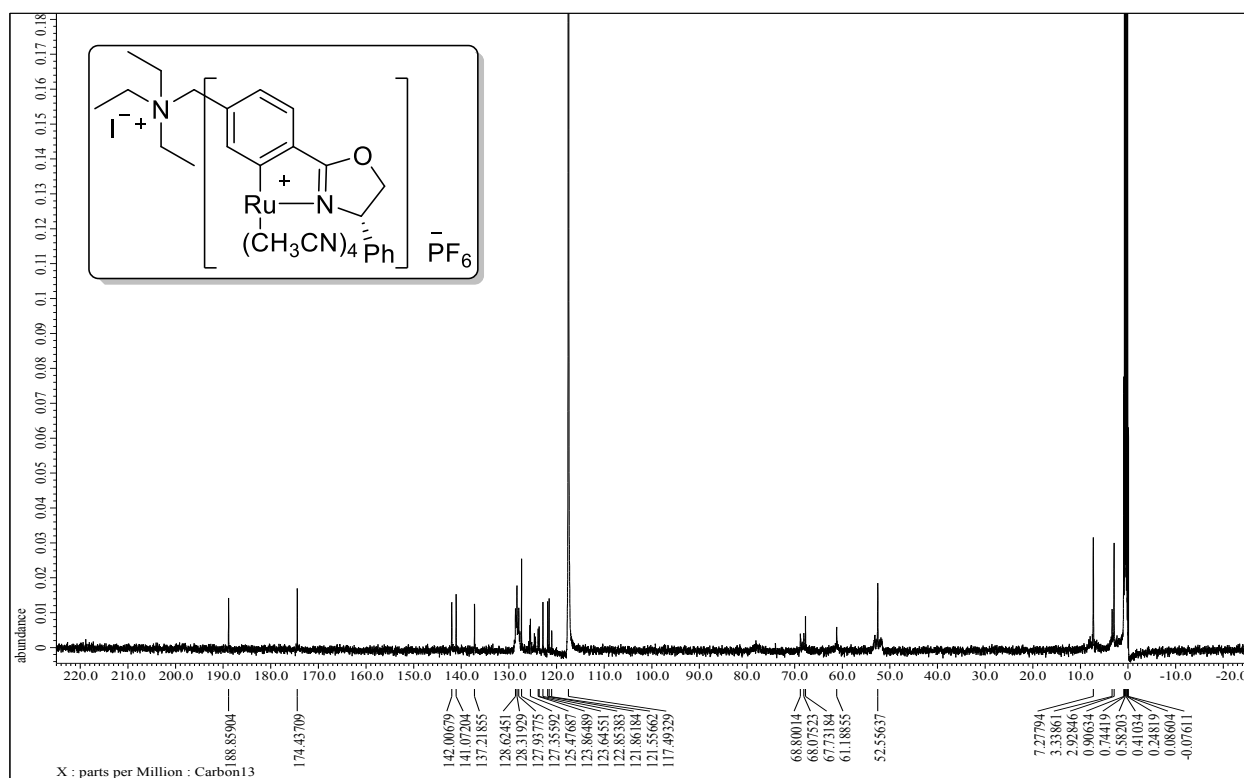

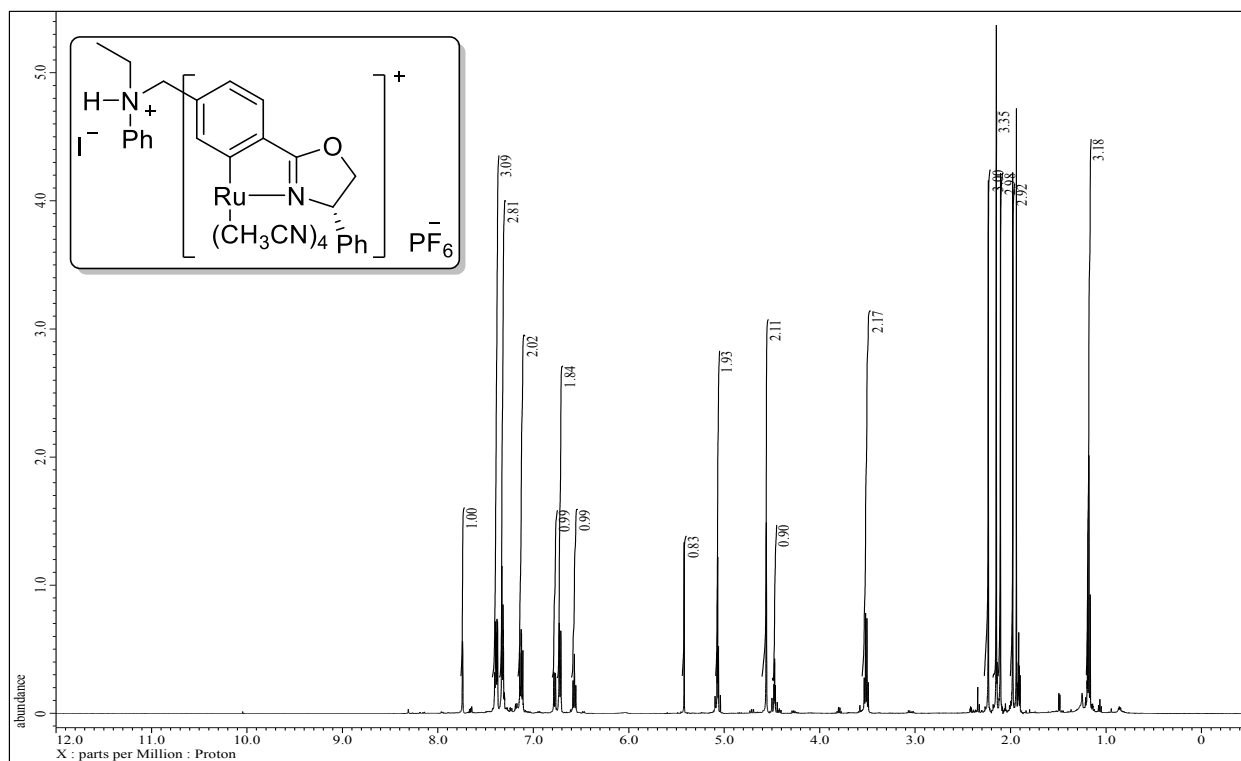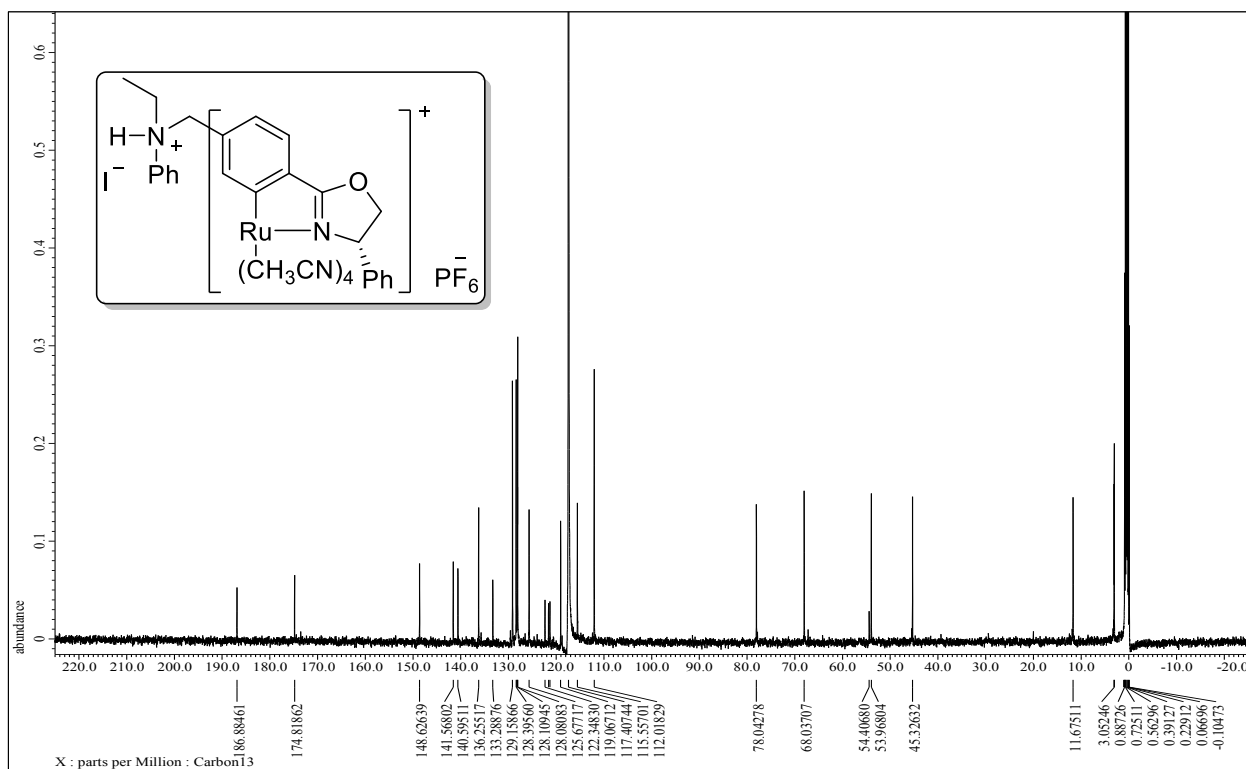



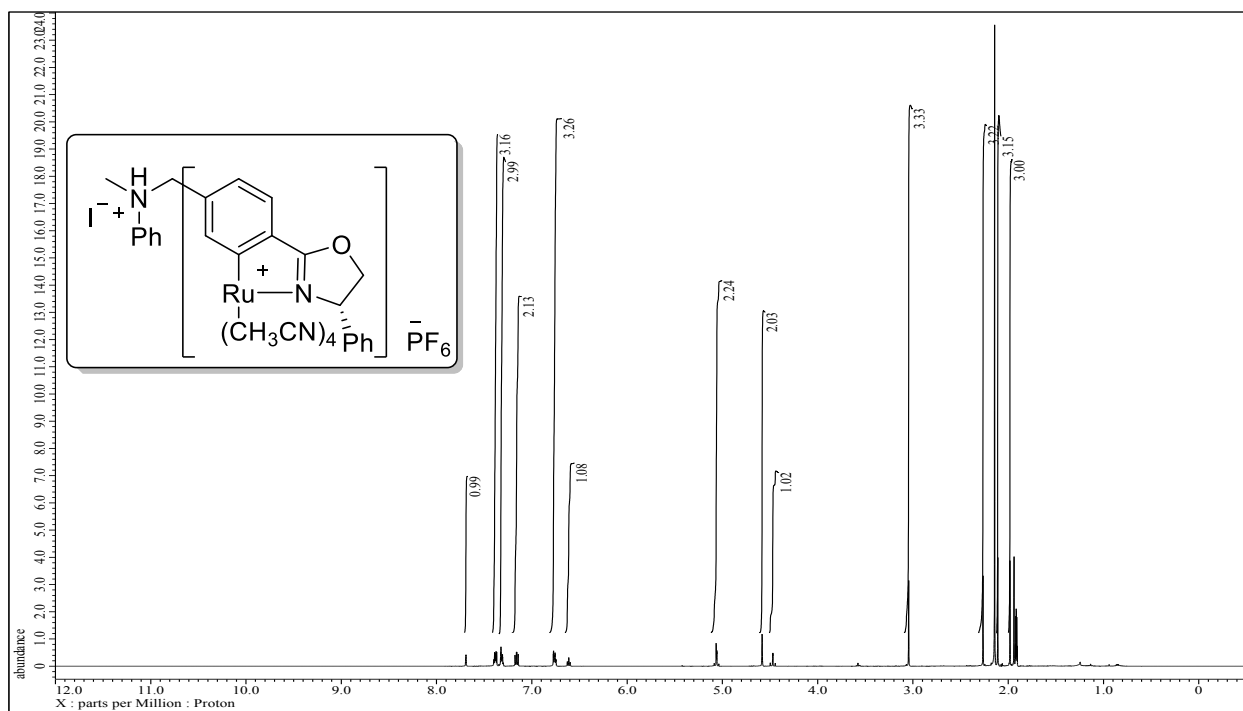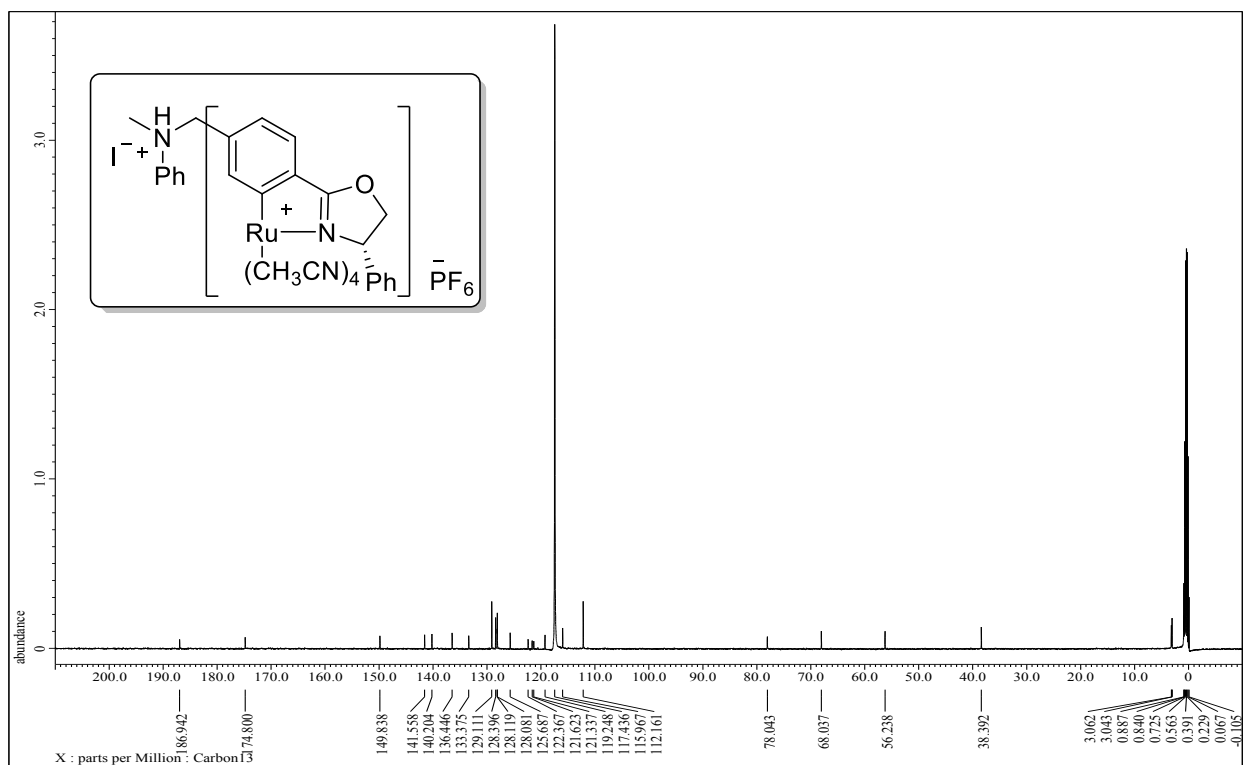

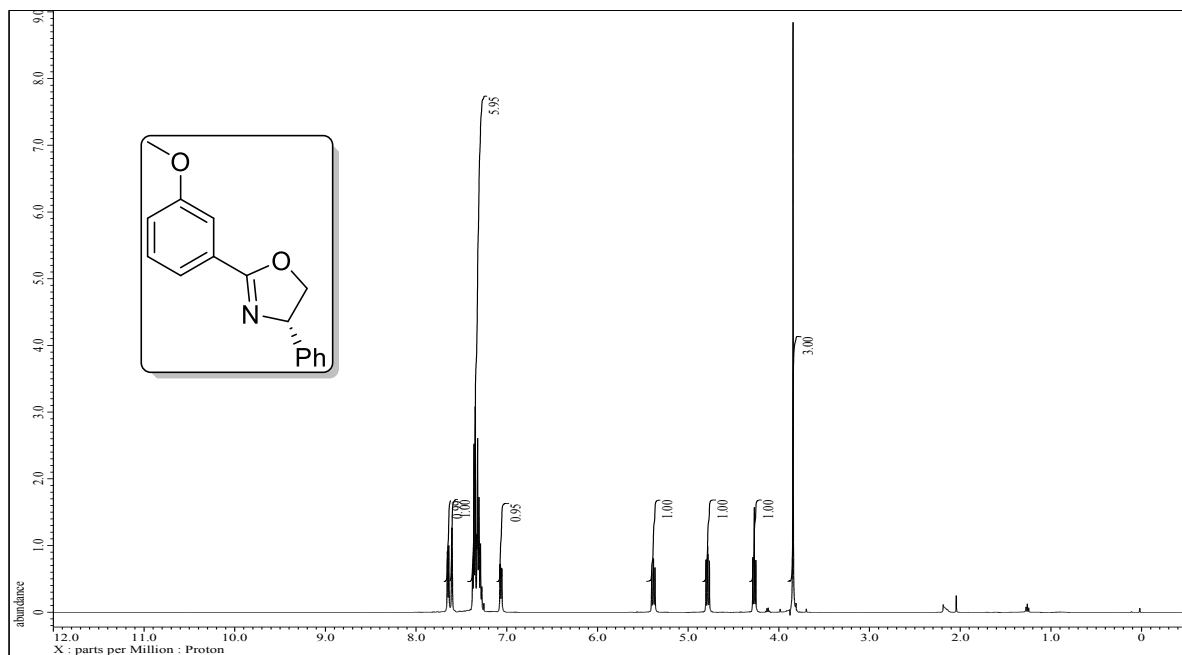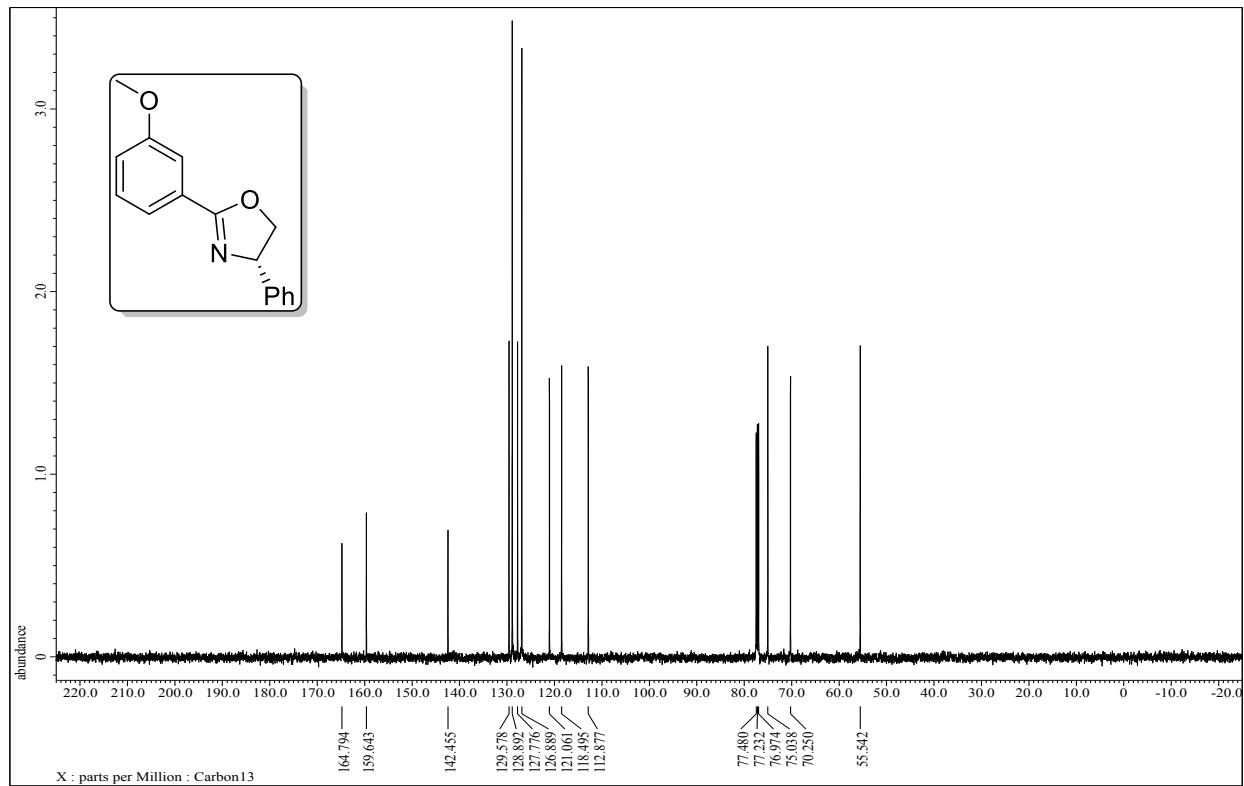

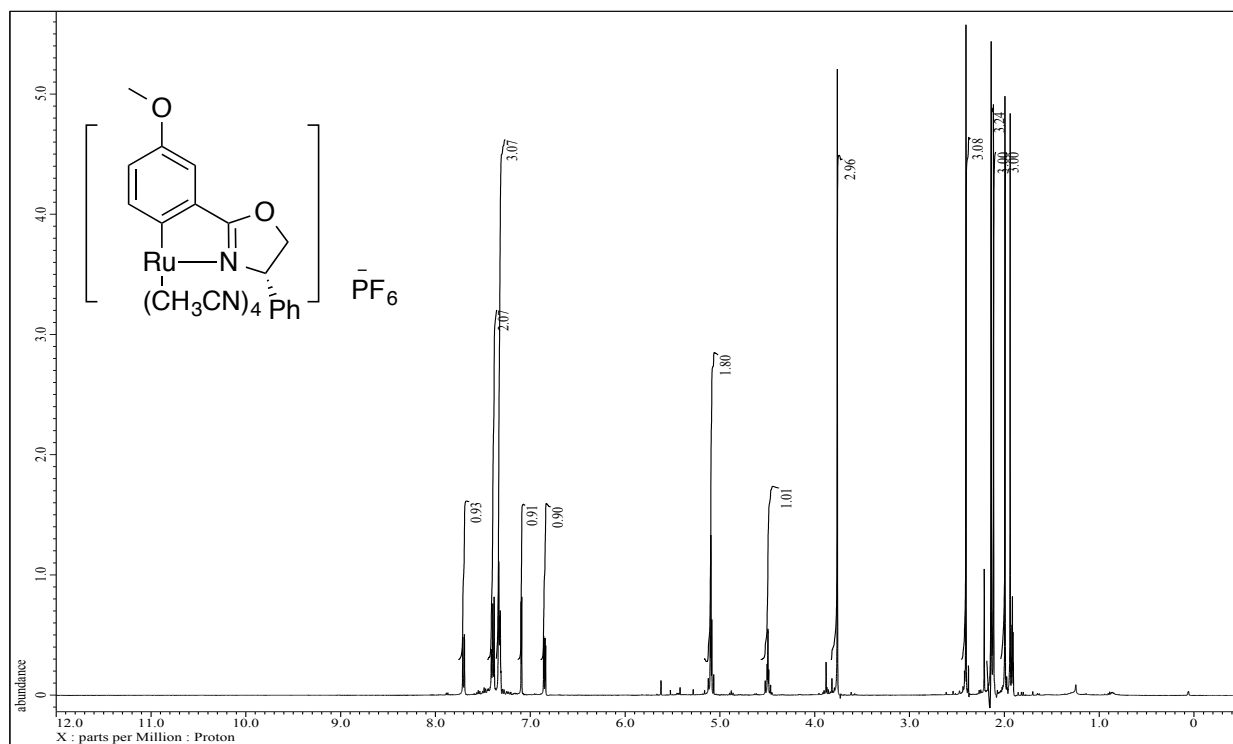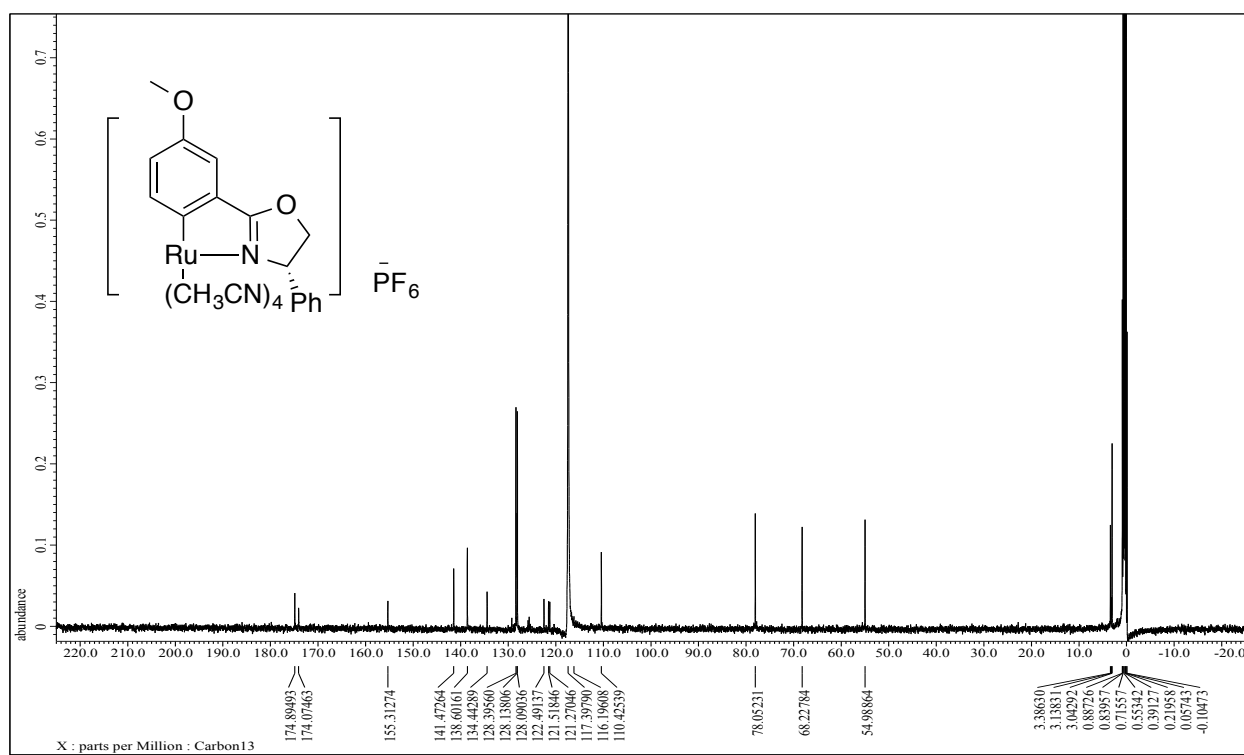

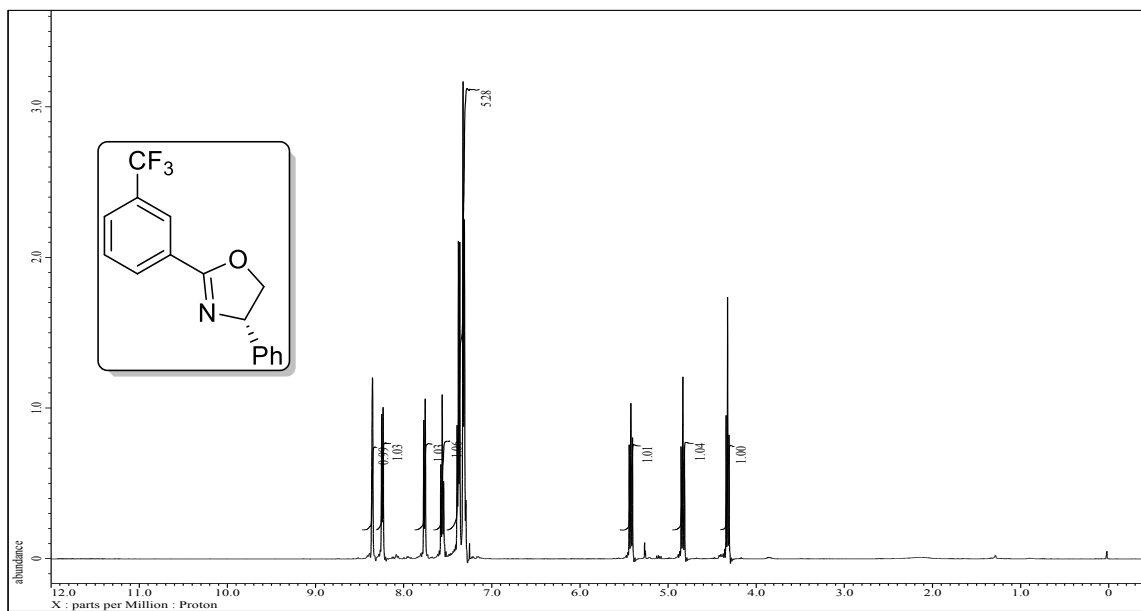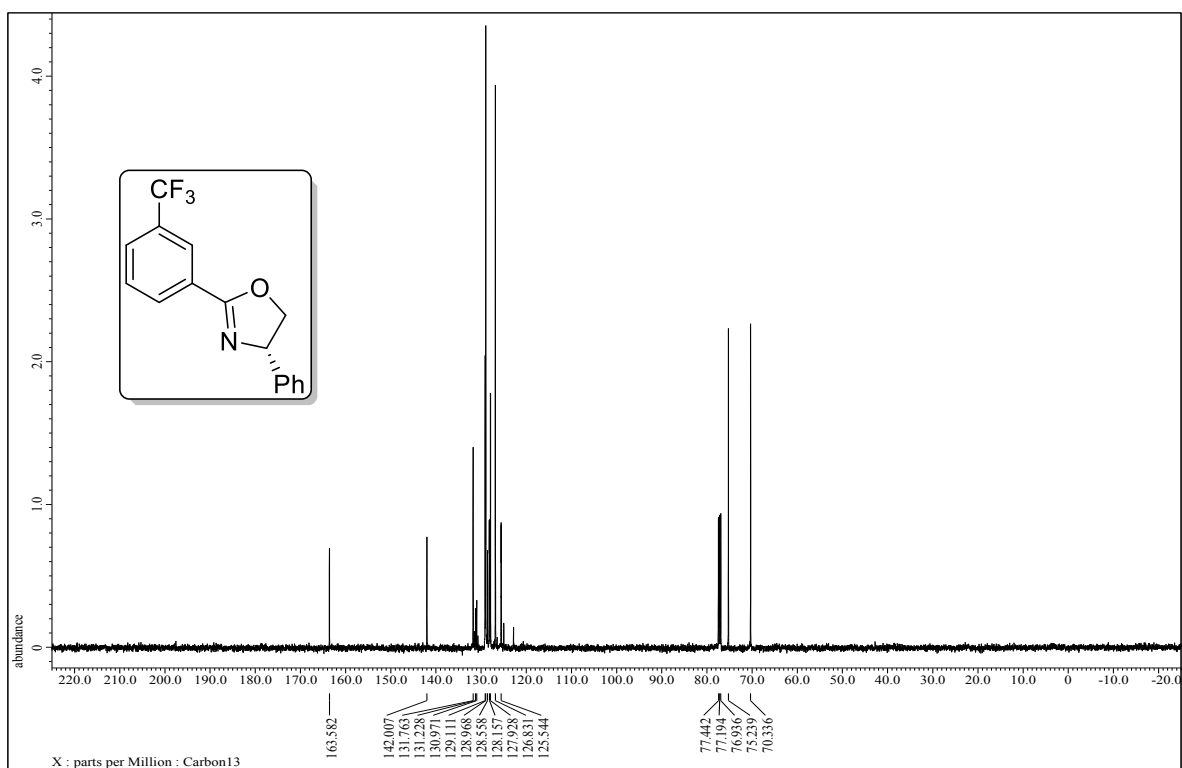

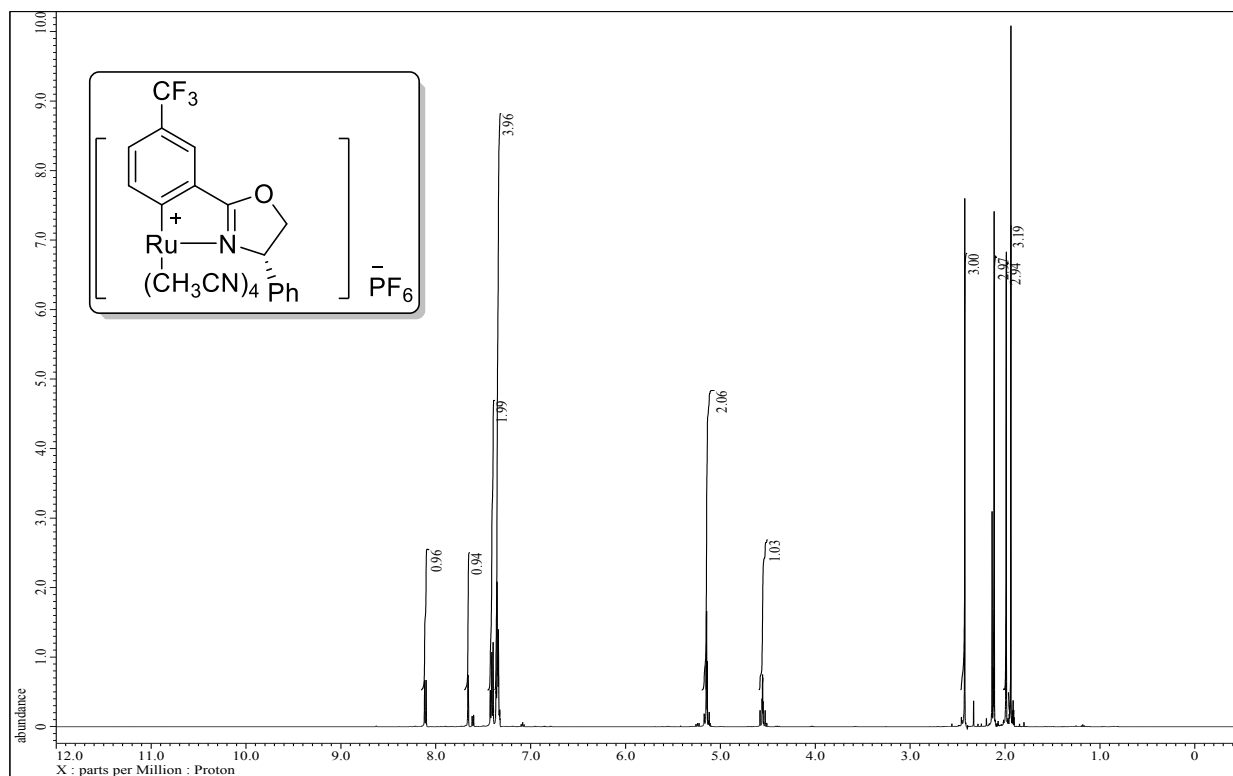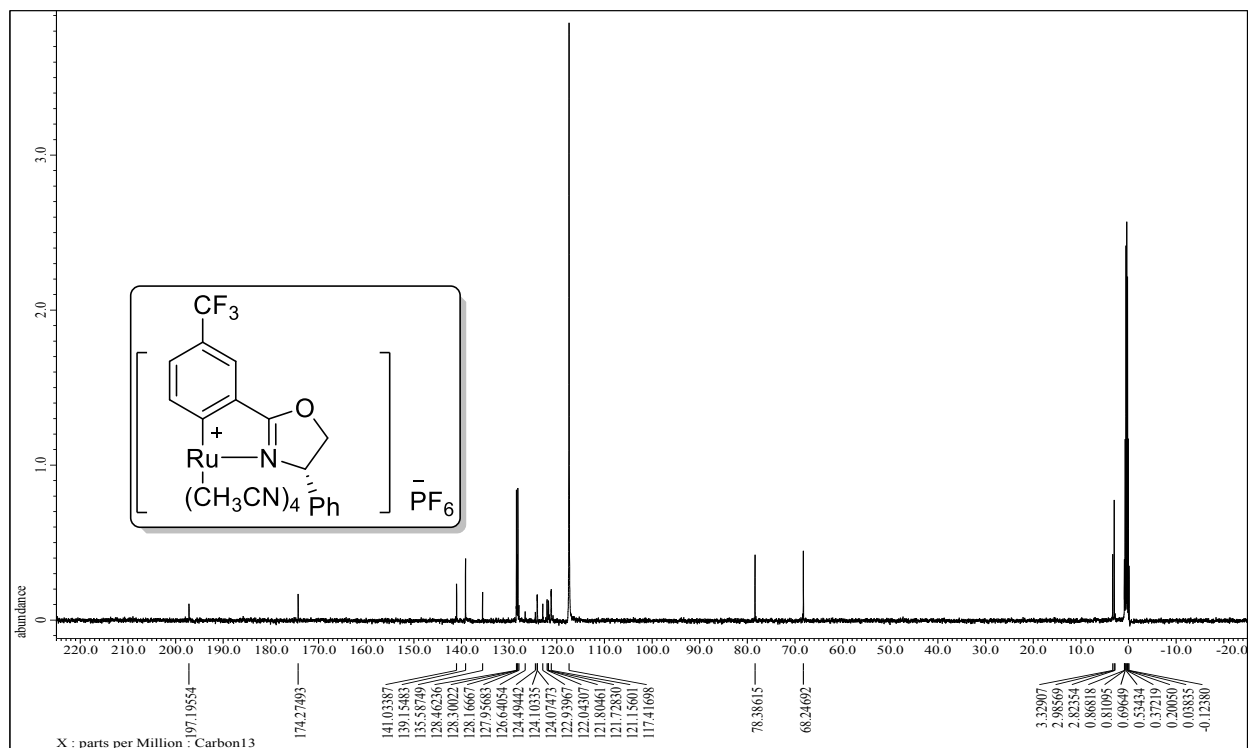

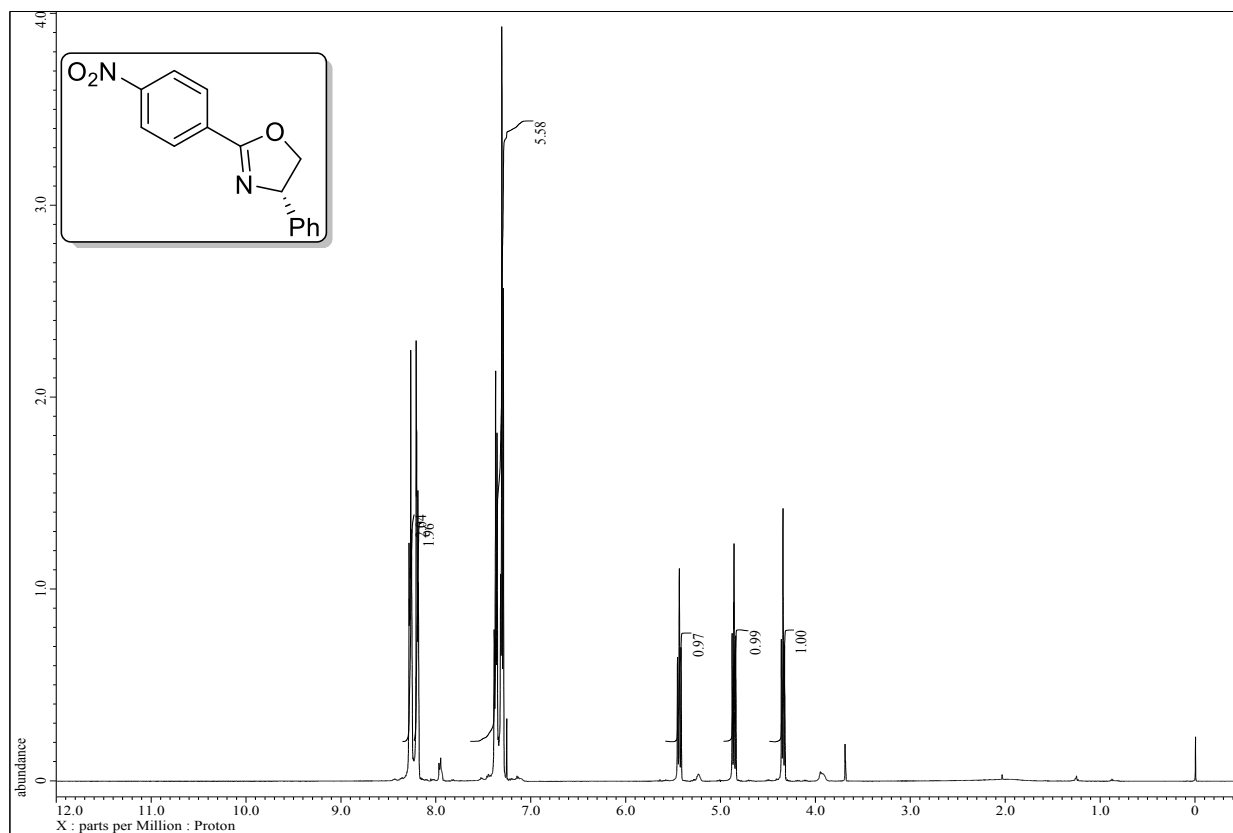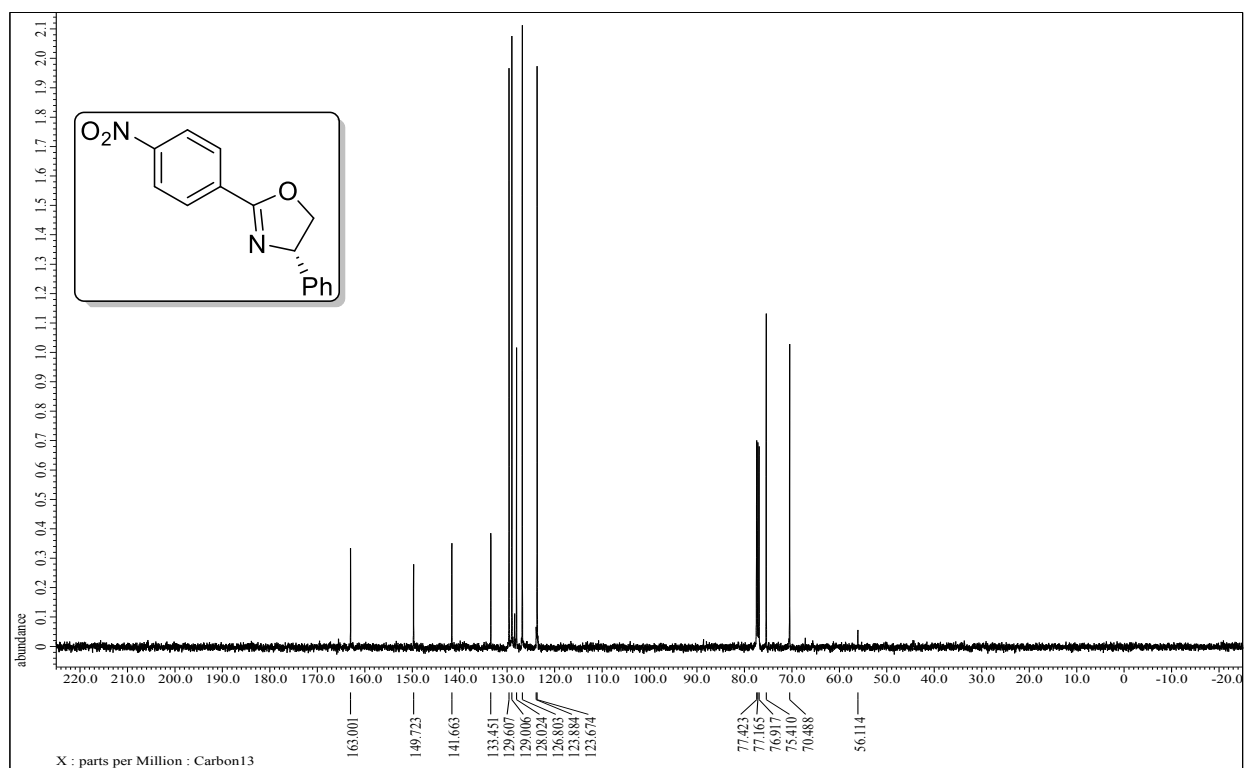

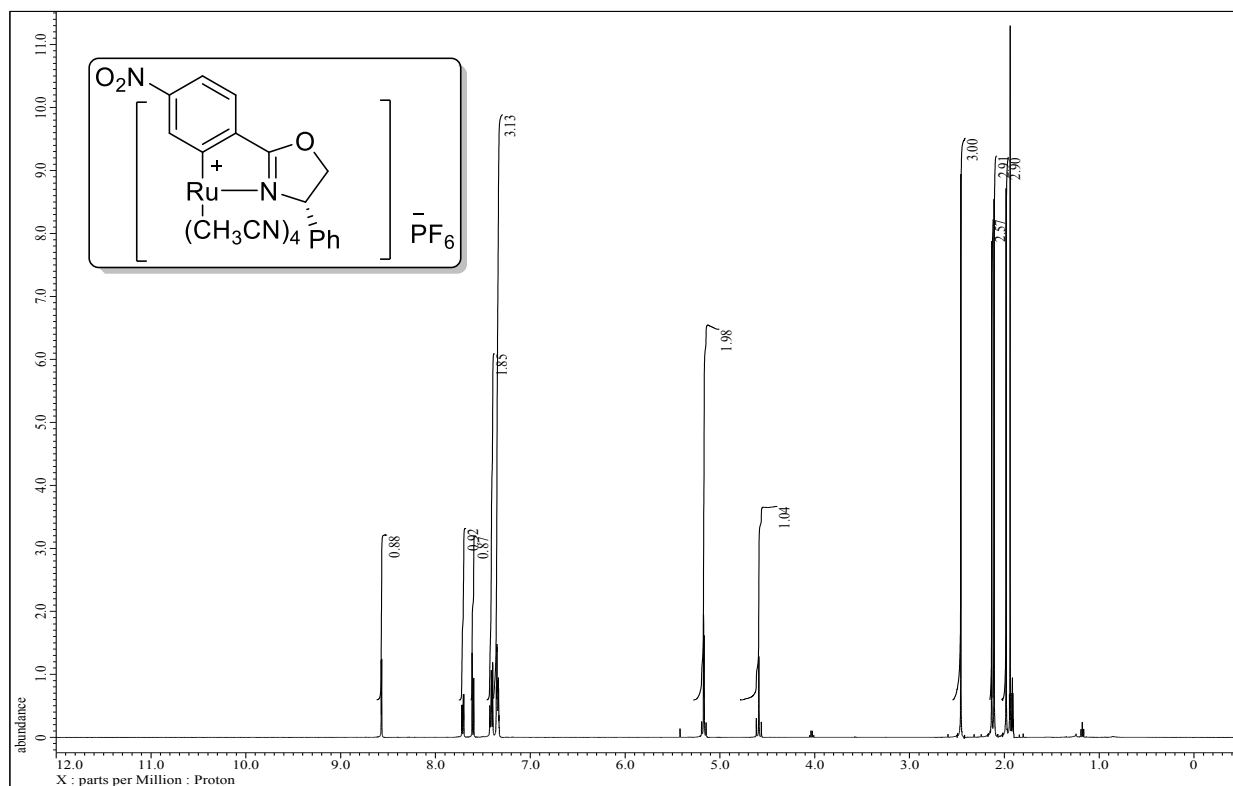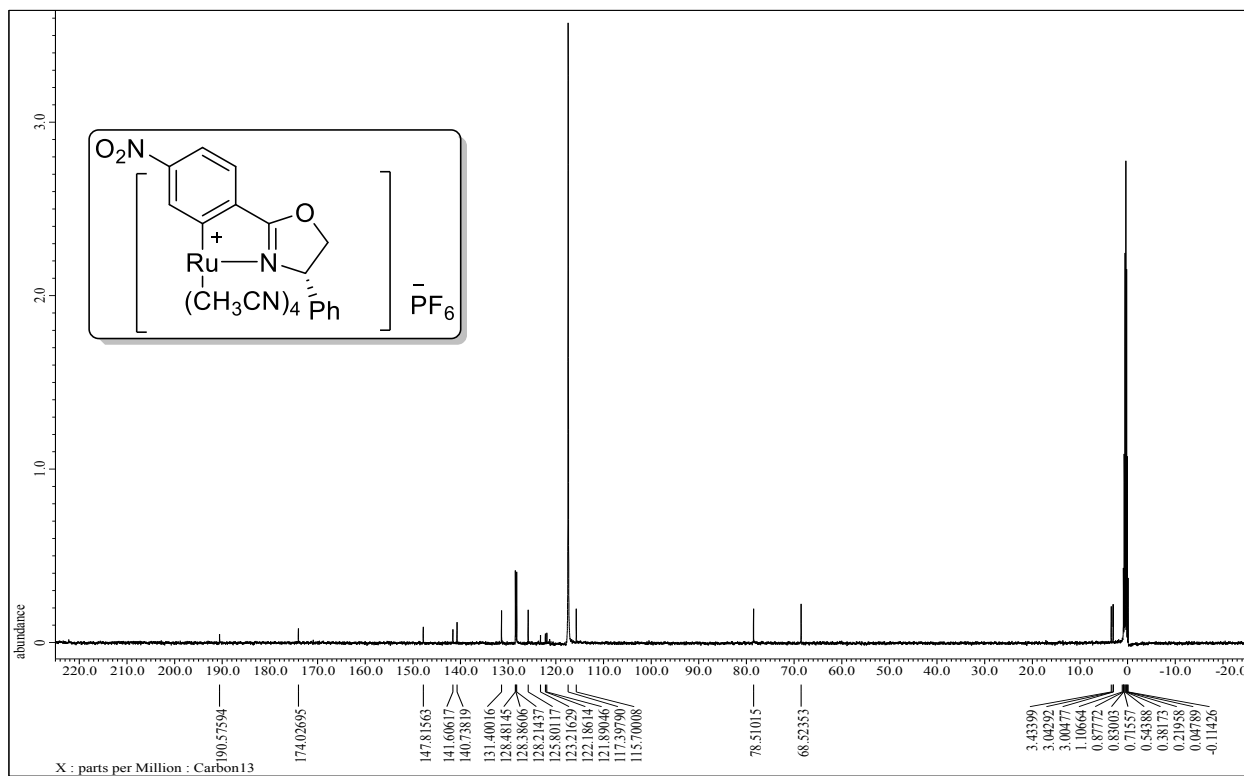

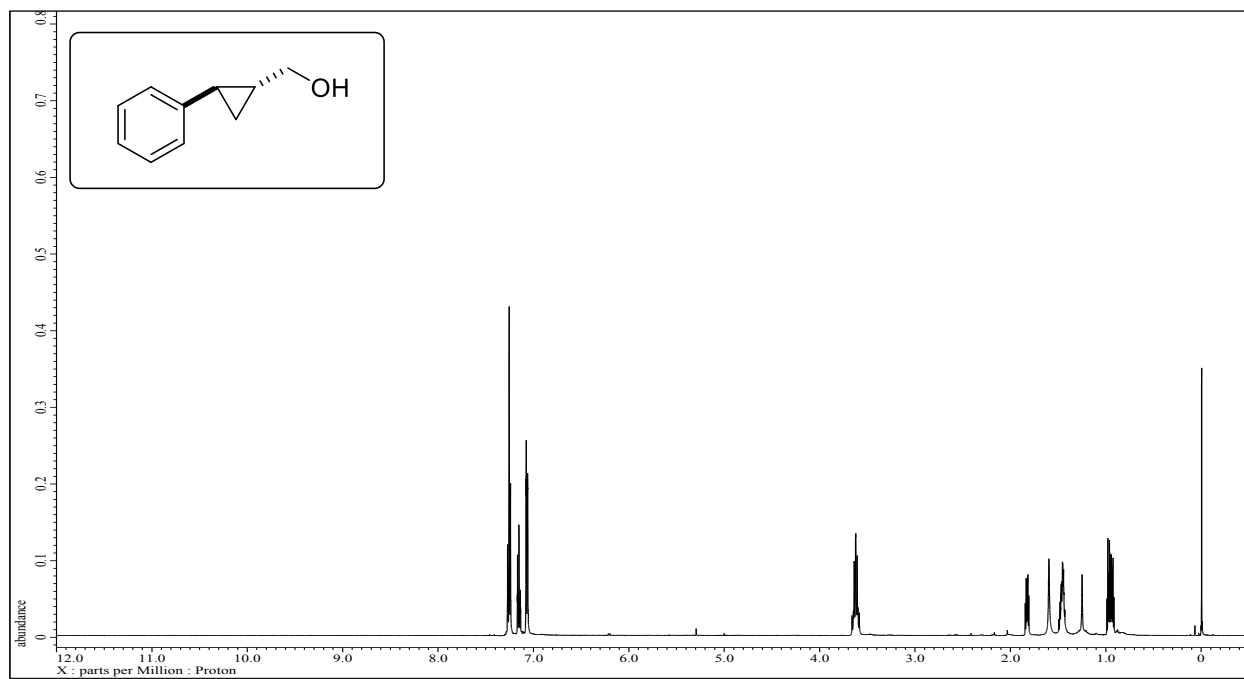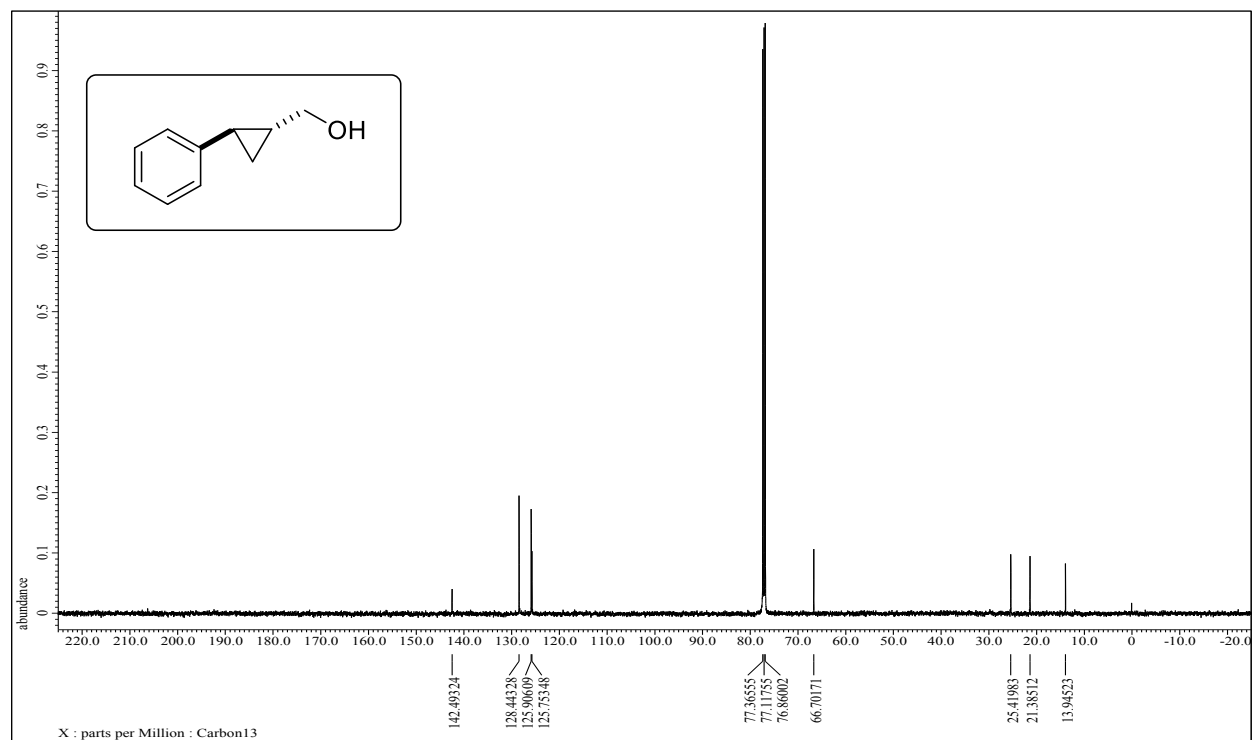



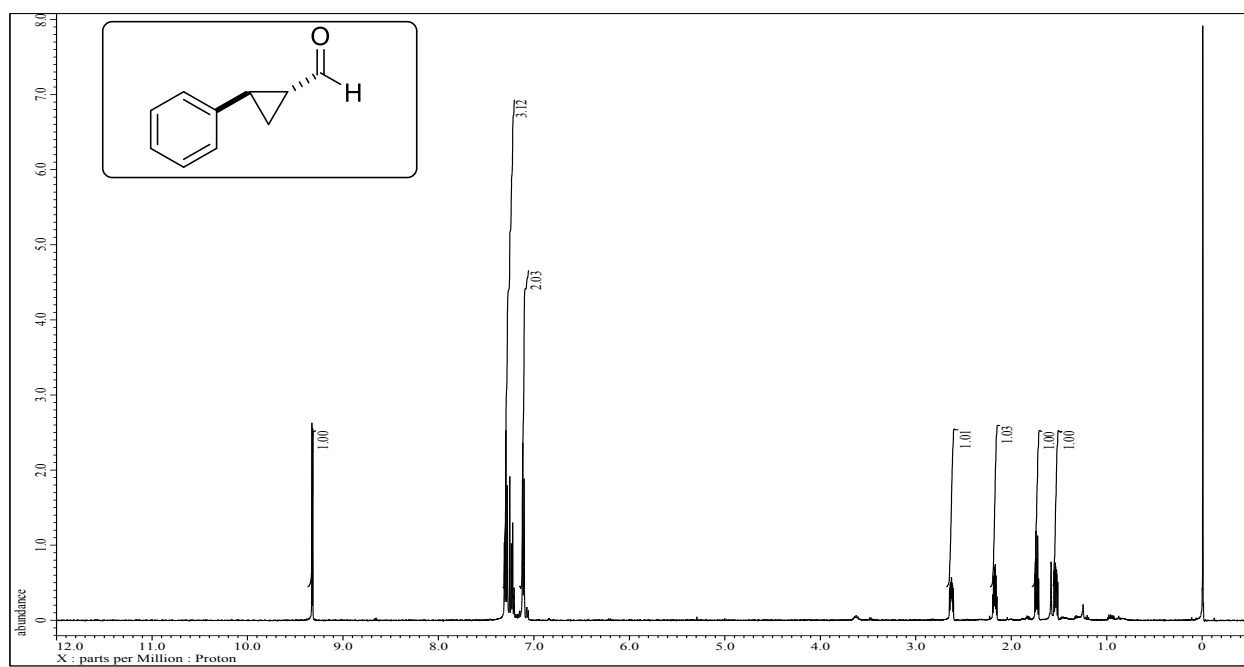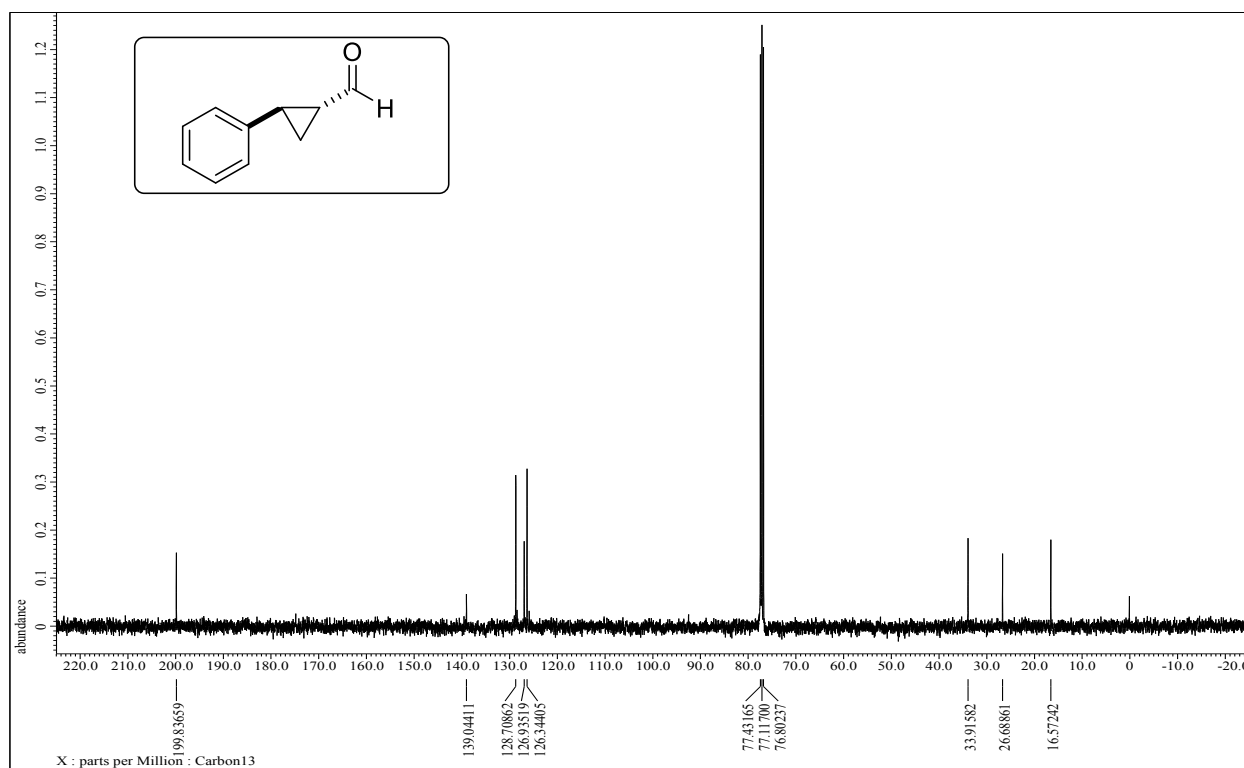

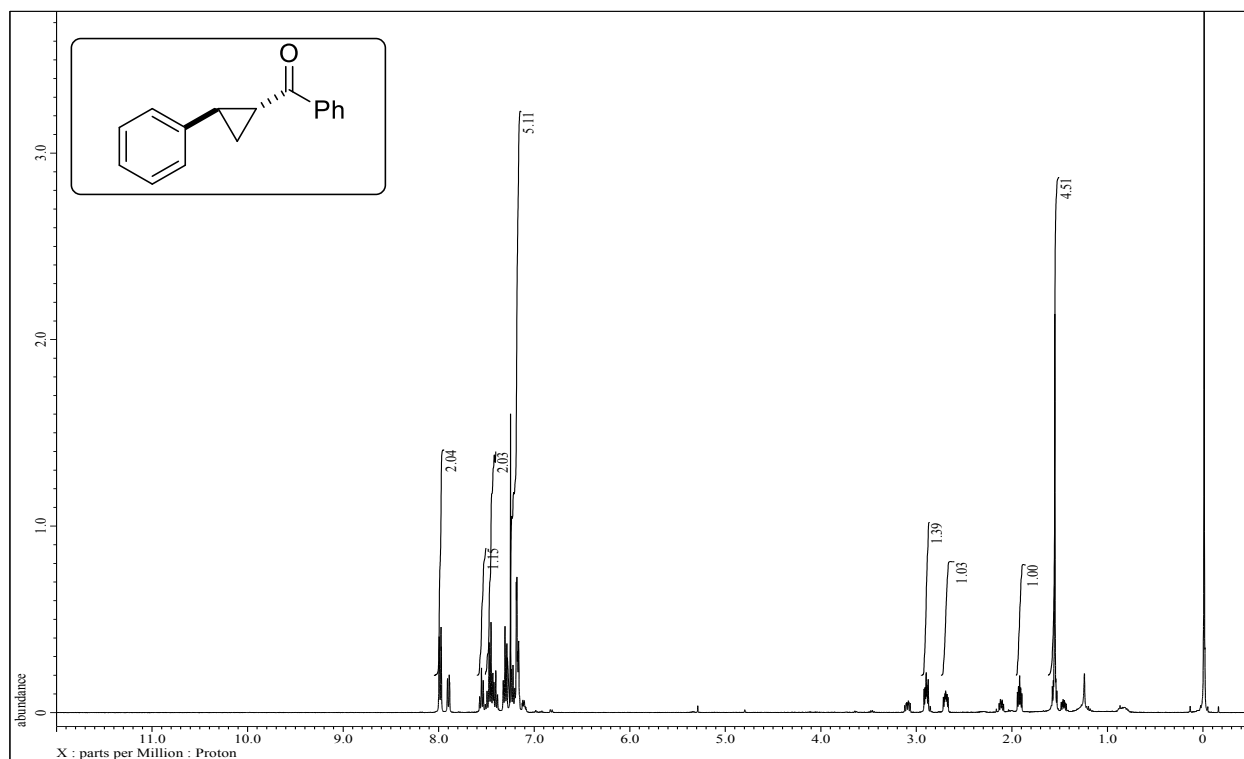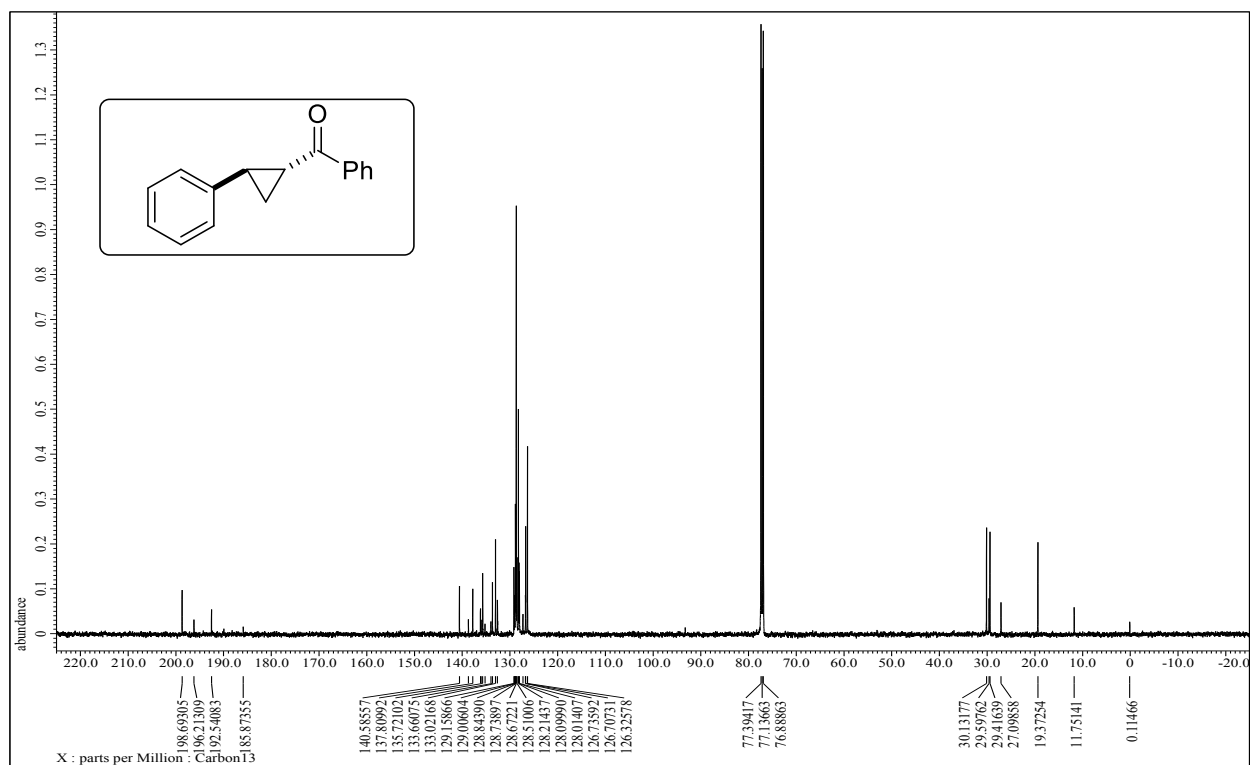

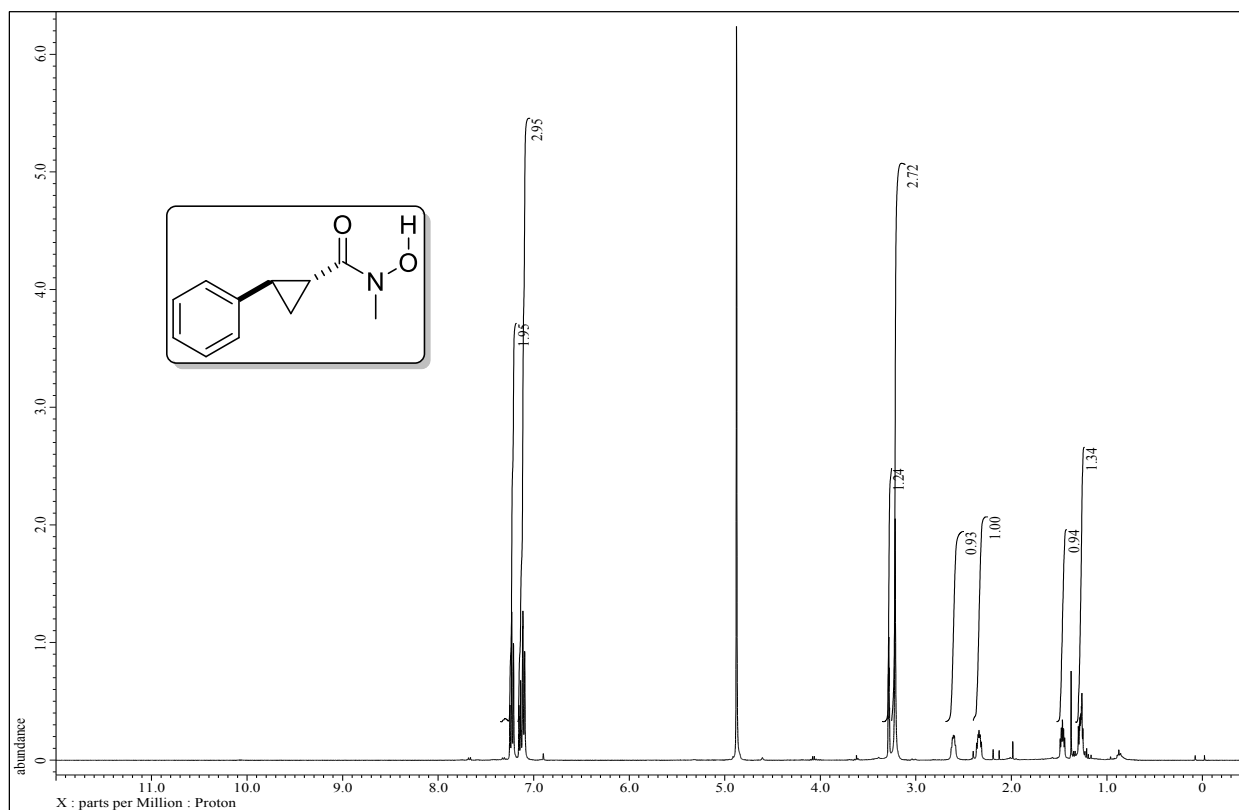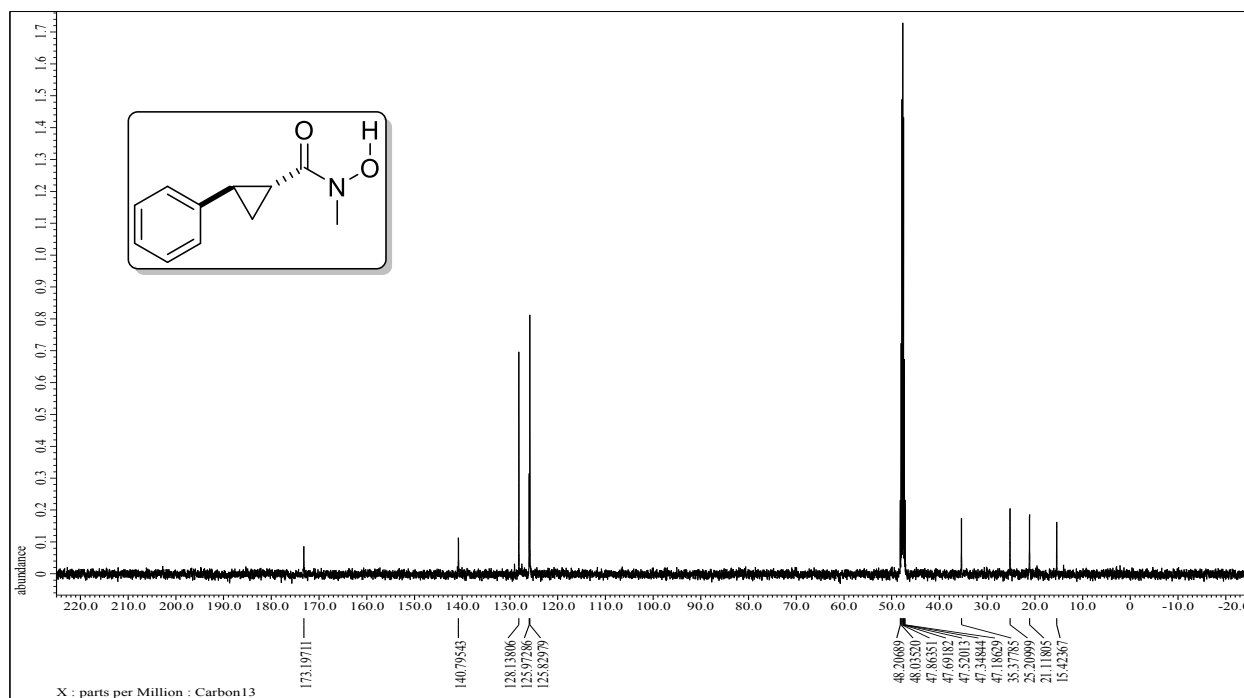

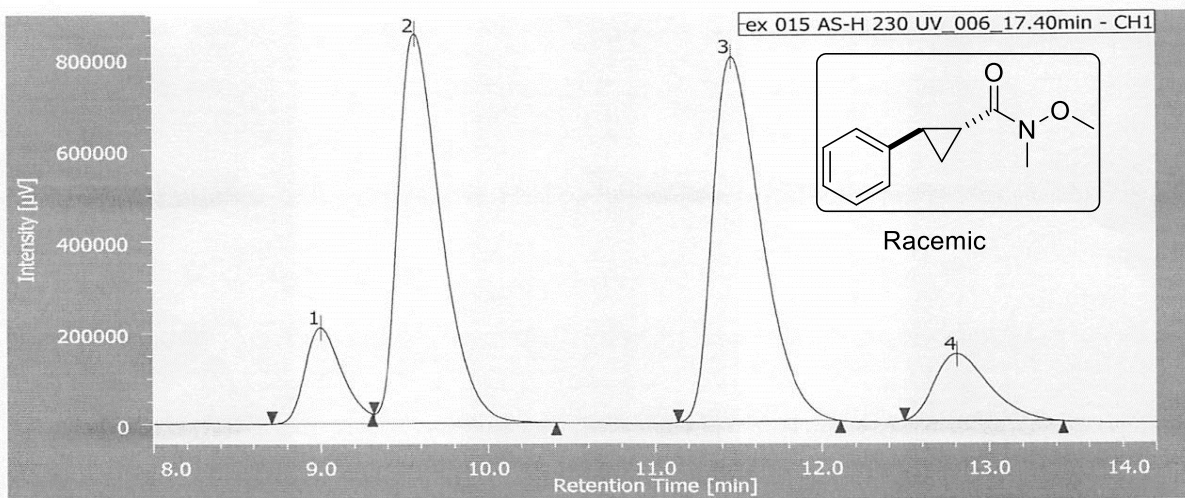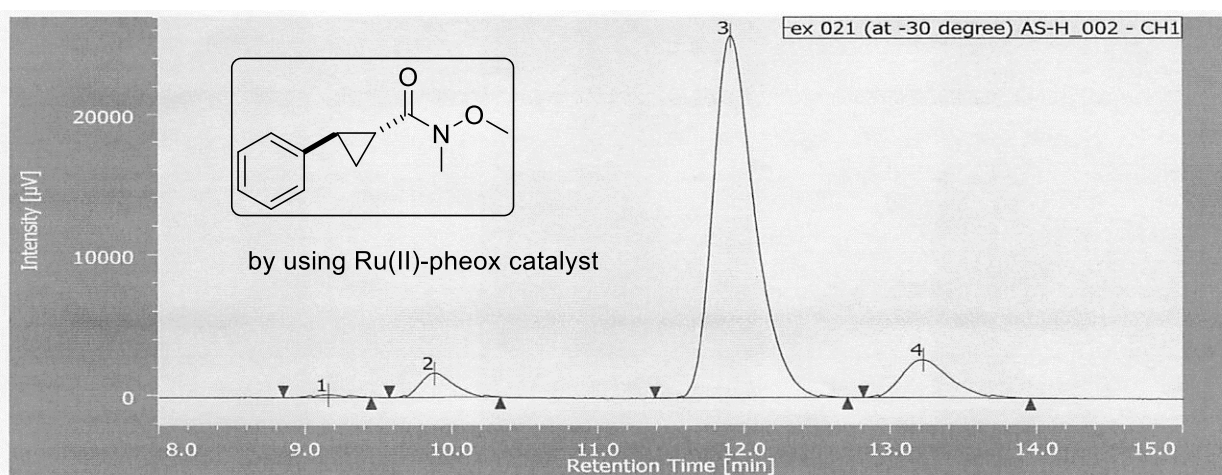

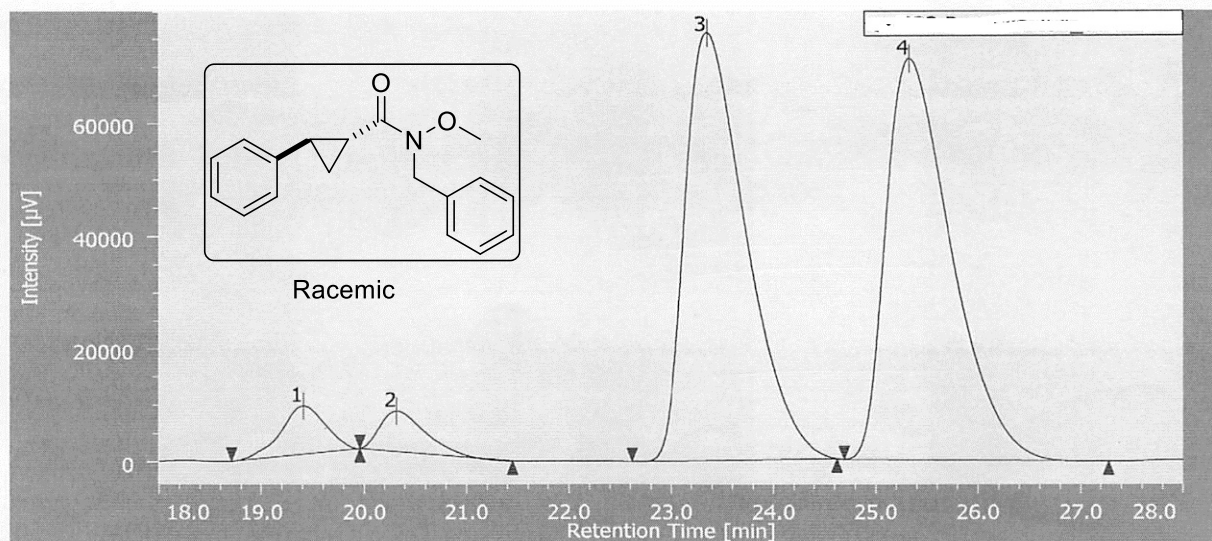

| No. | Time [min] | Area [μV-sec] | Area% |
|-----|------------|---------------|-------|
| 1   | 19.4       | 255618        | 3.78  |
| 2   | 20.3       | 220606        | 3.26  |
| 3   | 23.35      | 3124709       | 46.72 |
| 4   | 25.32      | 3152161       | 46.67 |

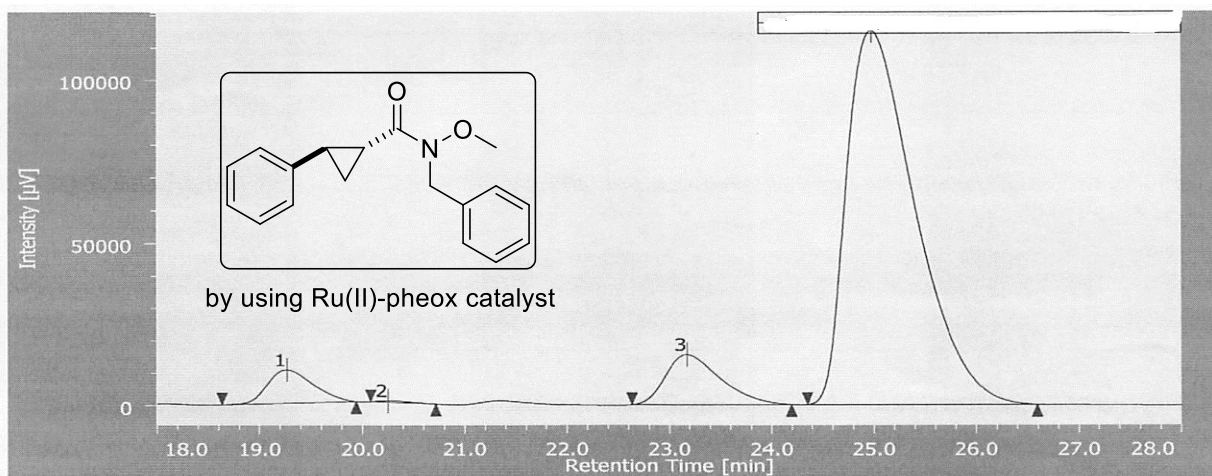

| No. | Time [min] | Area [μV-sec] | Area% |
|-----|------------|---------------|-------|
| 1   | 19.2       | 316069        | 5.08  |
| 2   | 20.25      | 10671         | 0.17  |
| 3   | 23.17      | 573226        | 9.22  |
| 4   | 24.97      | 5317402       | 85.52 |

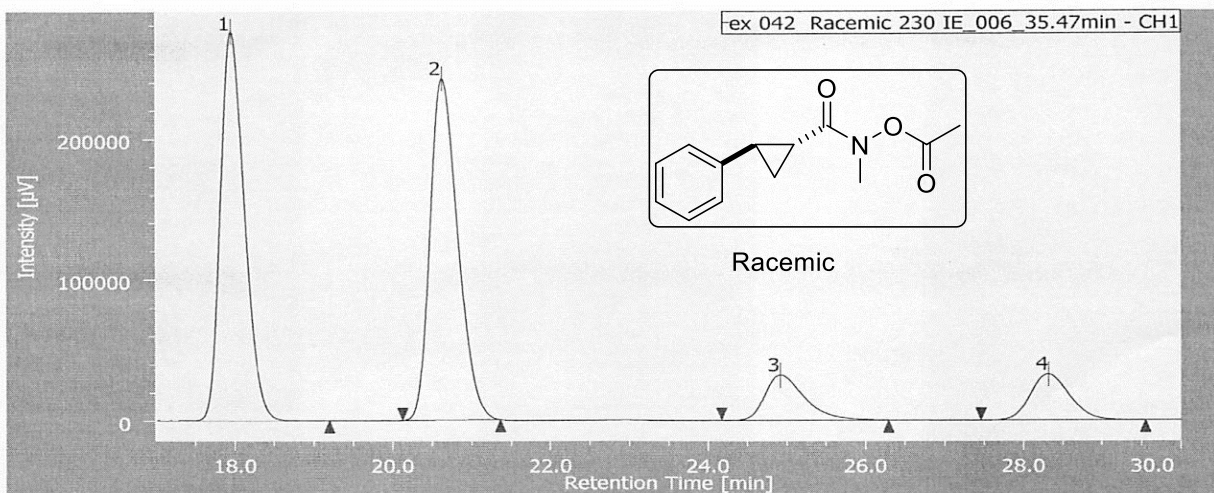

| No. | Time [min] | Area [μV-sec] | Area% |
|-----|------------|---------------|-------|
| 1   | 17.95      | 5827797       | 41.74 |
| 2   | 20.62      | 5903145       | 41.56 |
| 3   | 24.91      | 1111962       | 5.51  |
| 4   | 28.31      | 1117682       | 5.60  |

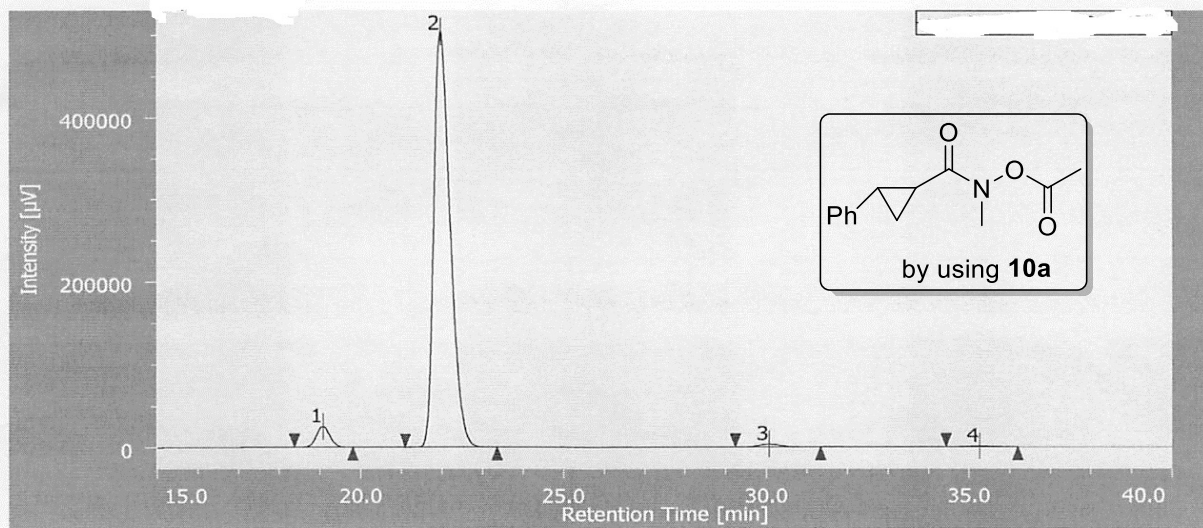

| No. | Time [min] | Area [μV-sec] | Area% |
|-----|------------|---------------|-------|
| 1   | 19.07      | 579541        | 3.93  |
| 2   | 21.96      | 13994561      | 94.90 |
| 3   | 30.06      | 126314        | 0.85  |
| 4   | 35.25      | 46176         | 0.31  |

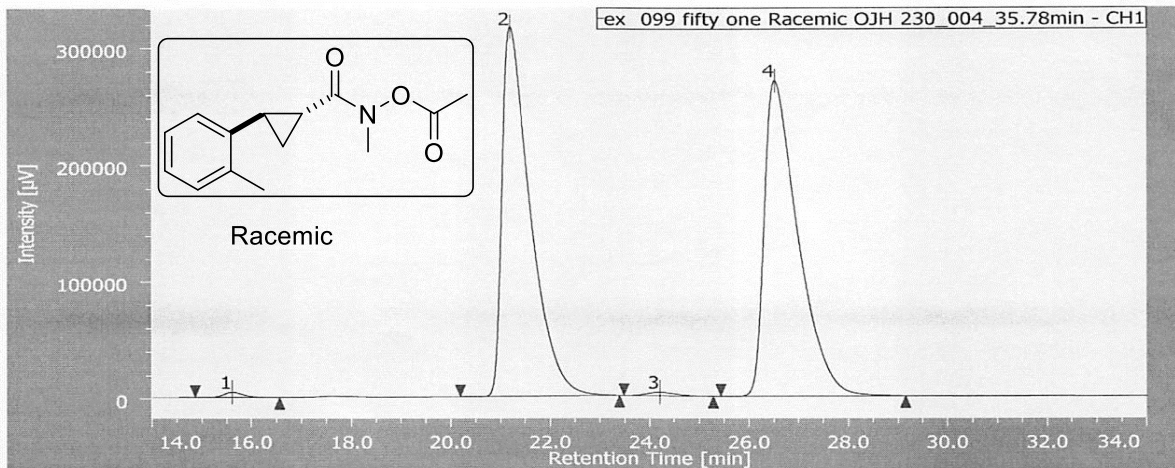

| No. | Time [min] | Area [μV-sec] | % Area |
|-----|------------|---------------|--------|
| 1   | 15.60      | 113411        | 0.445  |
| 2   | 21.19      | 12557536      | 49.22  |
| 3   | 24.20      | 120274        | 0.47   |
| 4   | 26.51      | 12717093      | 49.85  |

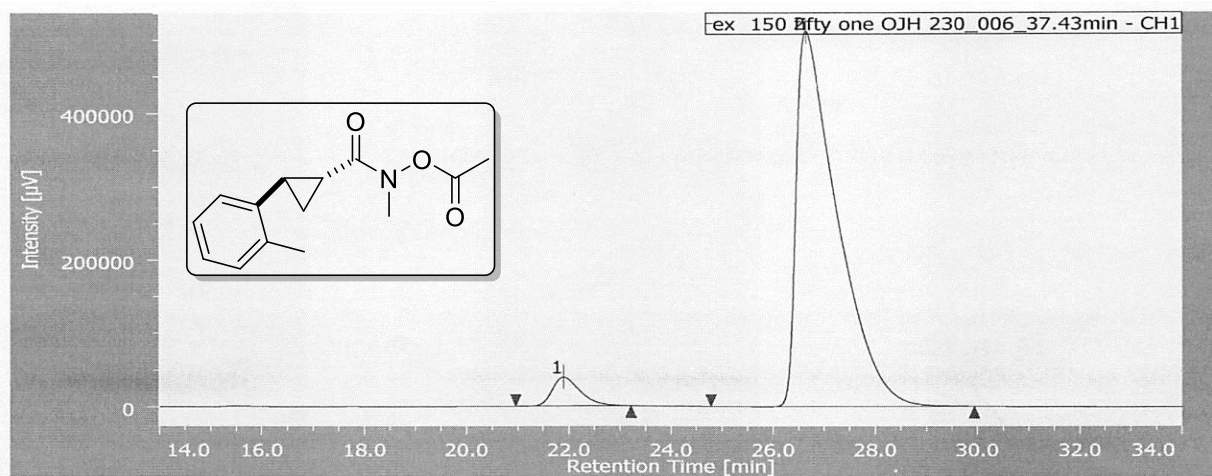

| No. | Time [min] | Area [μV-sec] | Area% |
|-----|------------|---------------|-------|
| 1   | 21.90      | 1484504       | 4.94  |
| 2   | 26.64      | 28536137      | 95.05 |

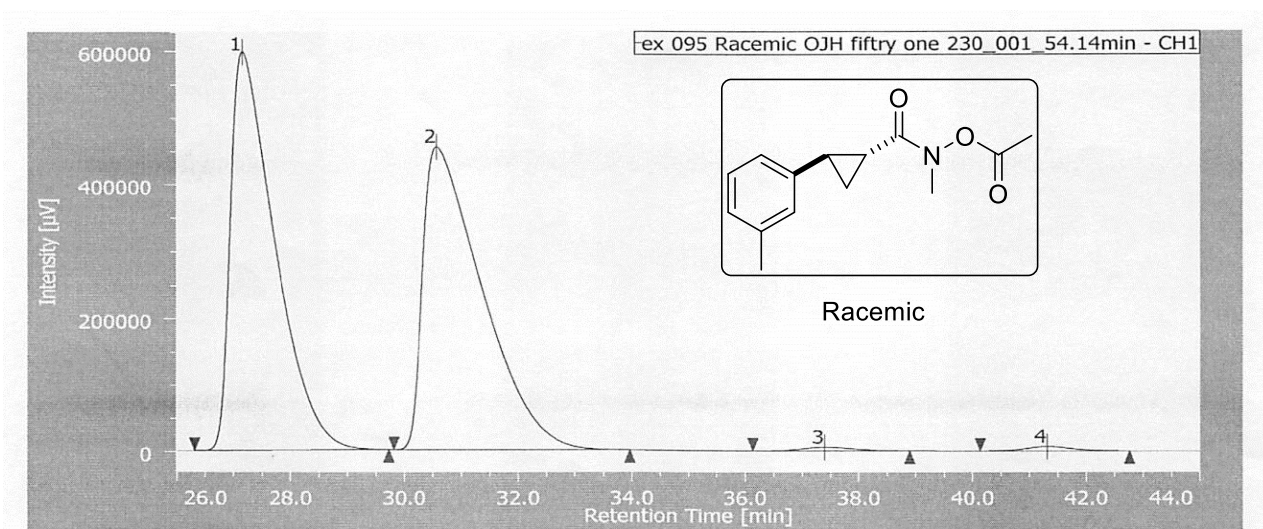

| No. | Time [min] | Area [µV-sec] | Area% |
|-----|------------|---------------|-------|
| 1   | 27.15      | 32365942      | 49.07 |
| 2   | 30.56      | 32871530      | 49.84 |
| 3   | 37.39      | 351018        | 0.53  |
| 4   | 41.30      | 360042        | 0.54  |

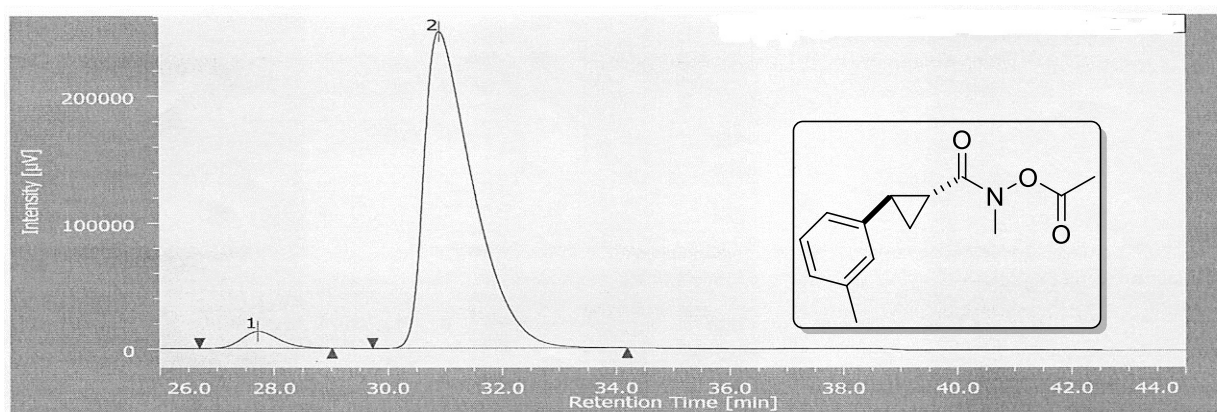

| No. | Time [min] | Area [µV-sec] | Area% |
|-----|------------|---------------|-------|
| 1   | 27.70      | 616064        | 3.98  |
| 2   | 30.90      | 14861790      | 96.02 |



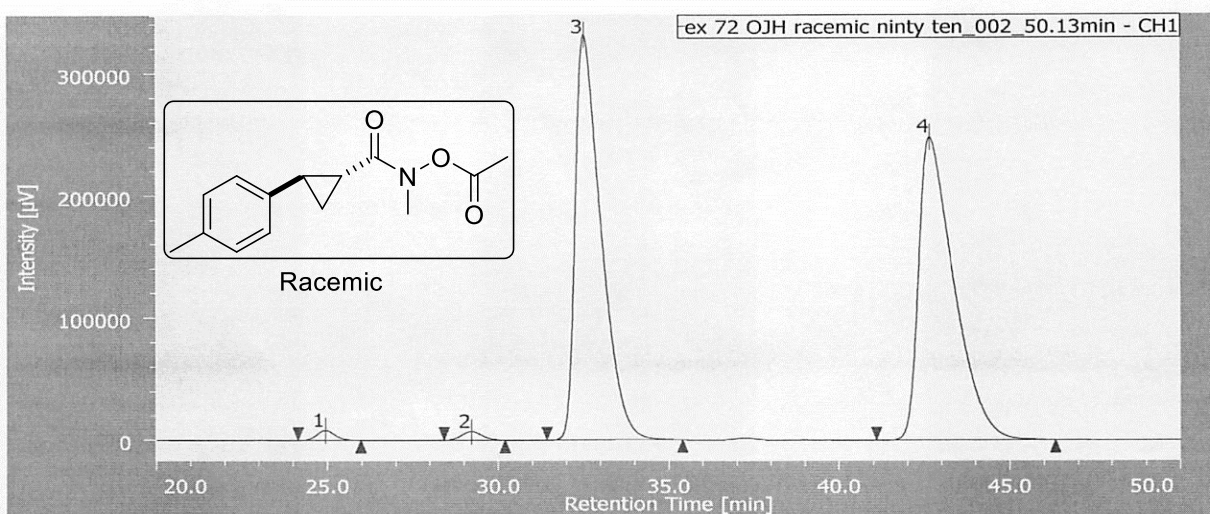

| No. | Time [min] | Area[μV-sec] | Area% |
|-----|------------|--------------|-------|
| 1   | 24.94      | 290226       | 0.81  |
| 2   | 29.21      | 286204       | 0.79  |
| 3   | 32.51      | 17407845     | 48.59 |
| 4   | 42.65      | 17837736     | 49.79 |

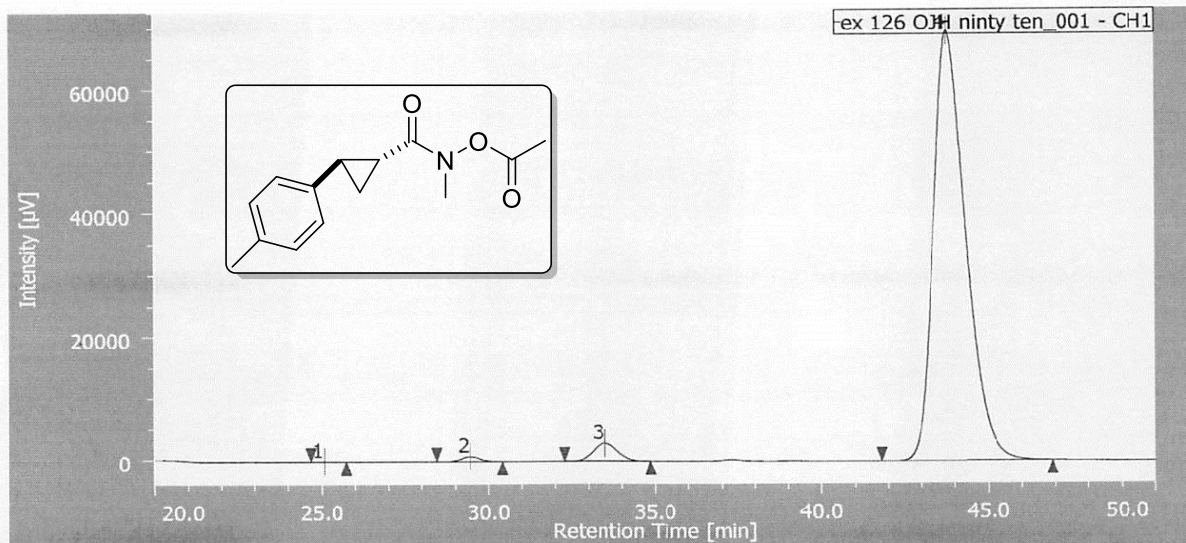

| No. | Time [min] | Area [μV-sec] | Area% |
|-----|------------|---------------|-------|
| 1   | 25.07      | 688           | 0.01  |
| 2   | 29.44      | 33623         | 0.69  |
| 3   | 33.49      | 145031        | 2.99  |
| 4   | 43.77      | 4656426       | 96.29 |

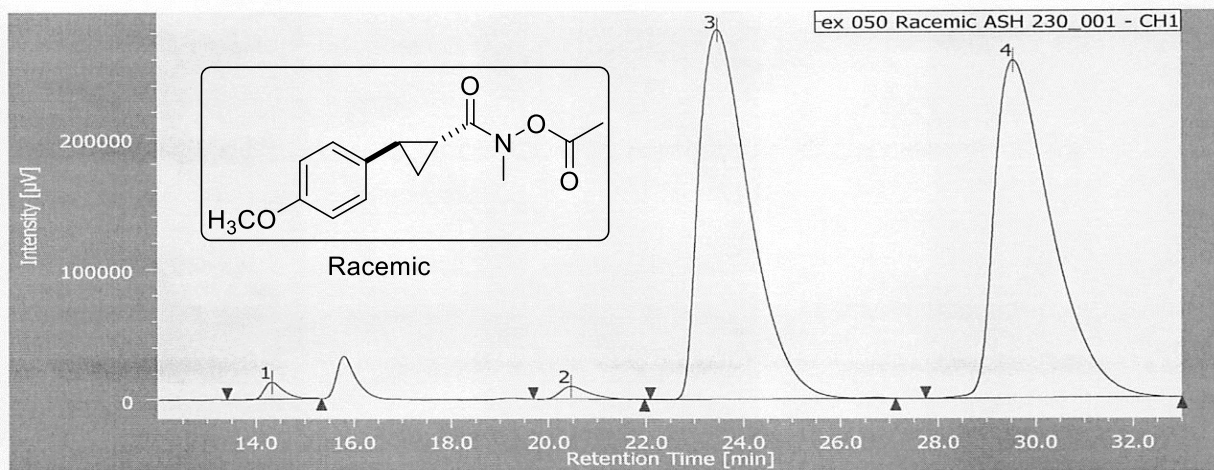

| No. | Time [min] | Area [μV-sec] | Area% |
|-----|------------|---------------|-------|
| 1   | 14.33      | 358248        | 0.85  |
| 2   | 20.45      | 380165        | 0.90  |
| 3   | 23.47      | 20405576      | 48.64 |
| 4   | 29.55      | 20800479      | 49.59 |

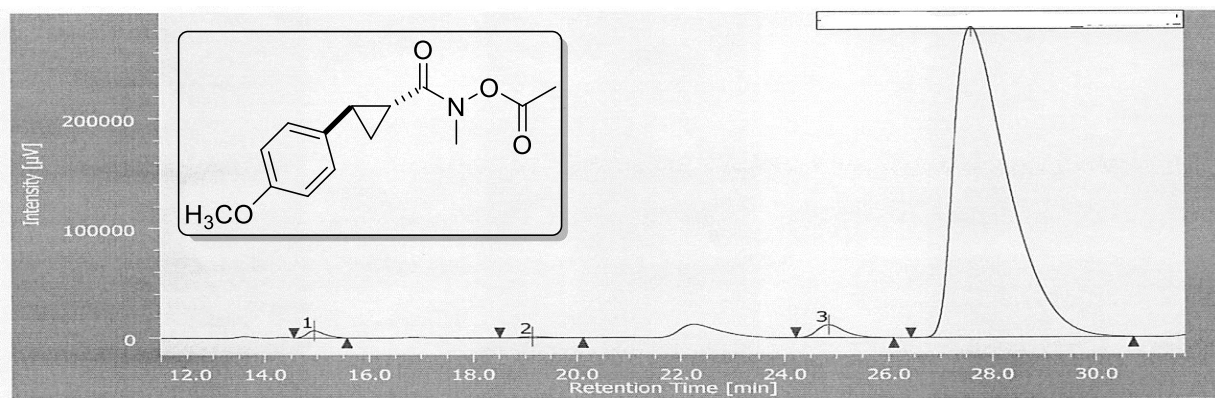

| No. | Time [min] | Area [μV-sec] | Area% |
|-----|------------|---------------|-------|
| 1   | 14.94      | 151276        | 0.72  |
| 2   | 19.13      | 41741         | 0.2   |
| 3   | 24.85      | 422371        | 2.02  |
| 4   | 27.60      | 20280047      | 97.05 |

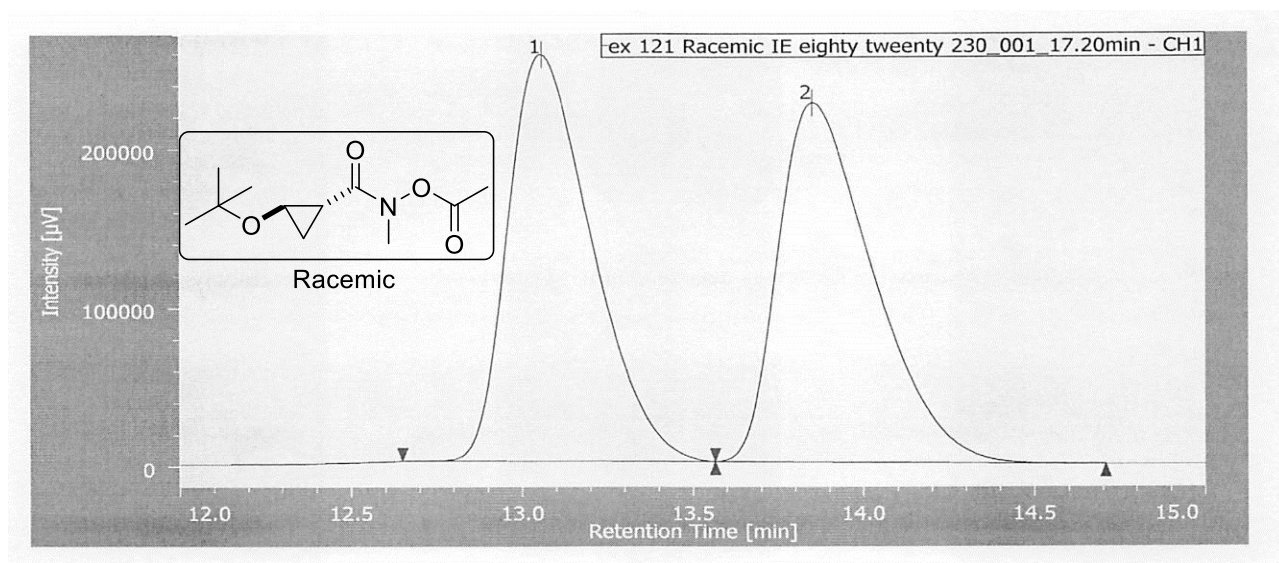

| No. | Time [min] | Area [μV-sec] | Area% |
|-----|------------|---------------|-------|
| 1   | 13.05      | 4377598       | 50.18 |
| 2   | 13.85      | 4345825       | 49.81 |

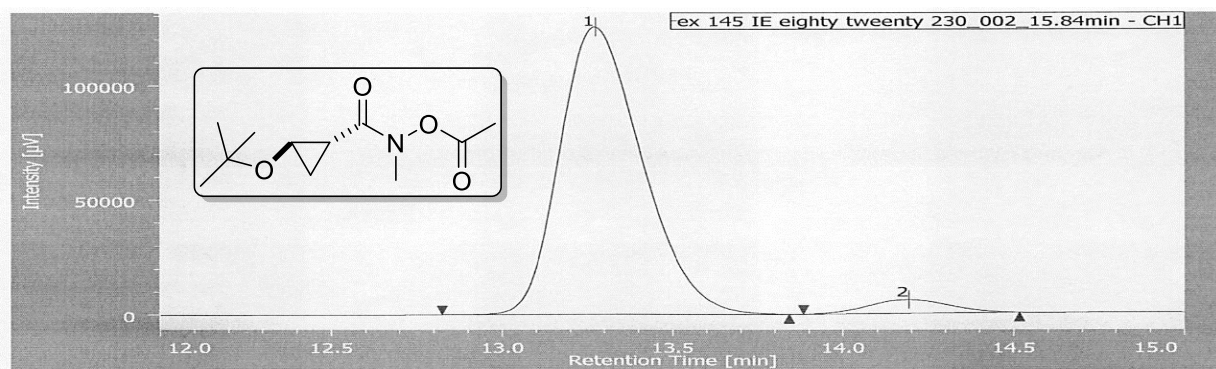

| No. | Time [min] | Area [μV-sec] | Area%  |
|-----|------------|---------------|--------|
| 1   | 13.27      | 2089043       | 95.414 |
| 2   | 14.19      | 100407        | 4.586  |

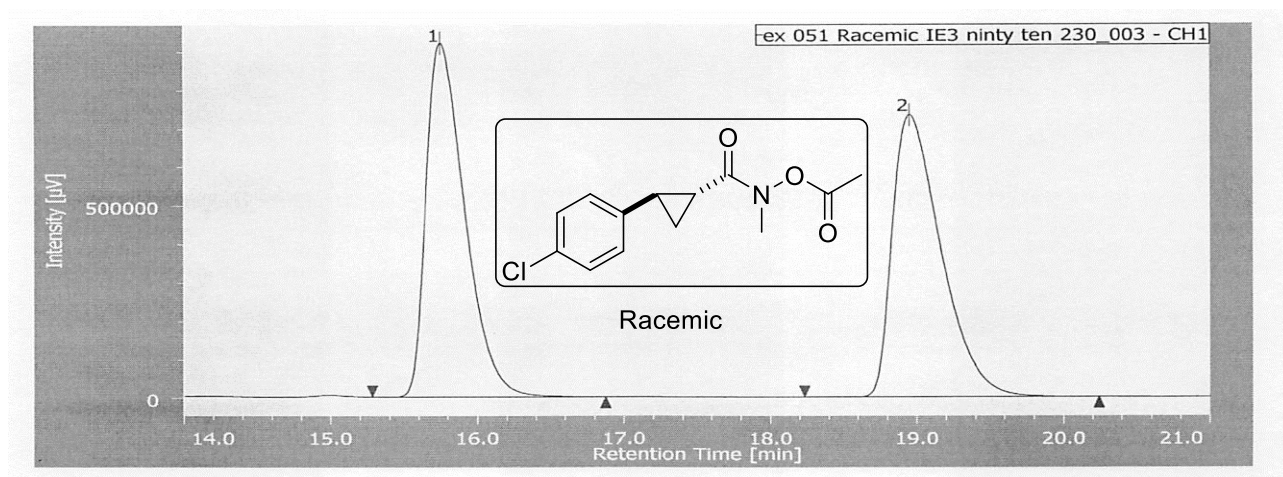

| No. | Time [min] | Area [μV-sec] | Area%  |
|-----|------------|---------------|--------|
| 1   | 15.75      | 16871308      | 49.978 |
| 2   | 18.95      | 16886310      | 50.022 |

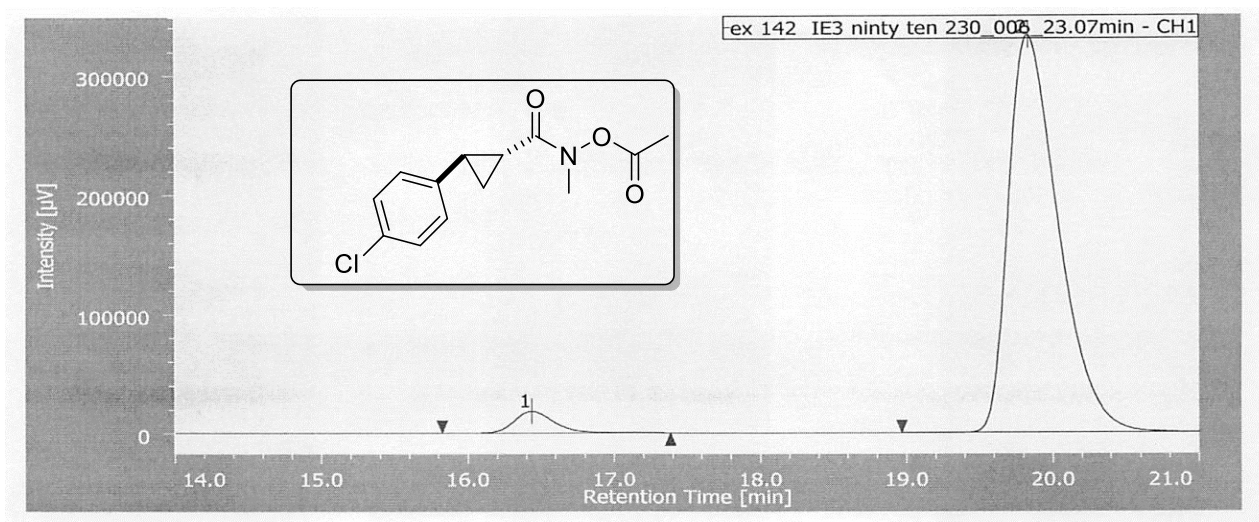

| No. | Time [min] | Area [μV-sec] | Area% |
|-----|------------|---------------|-------|
| 1   | 16.43      | 336053        | 4.10  |
| 2   | 19.83      | 7847894       | 95.89 |

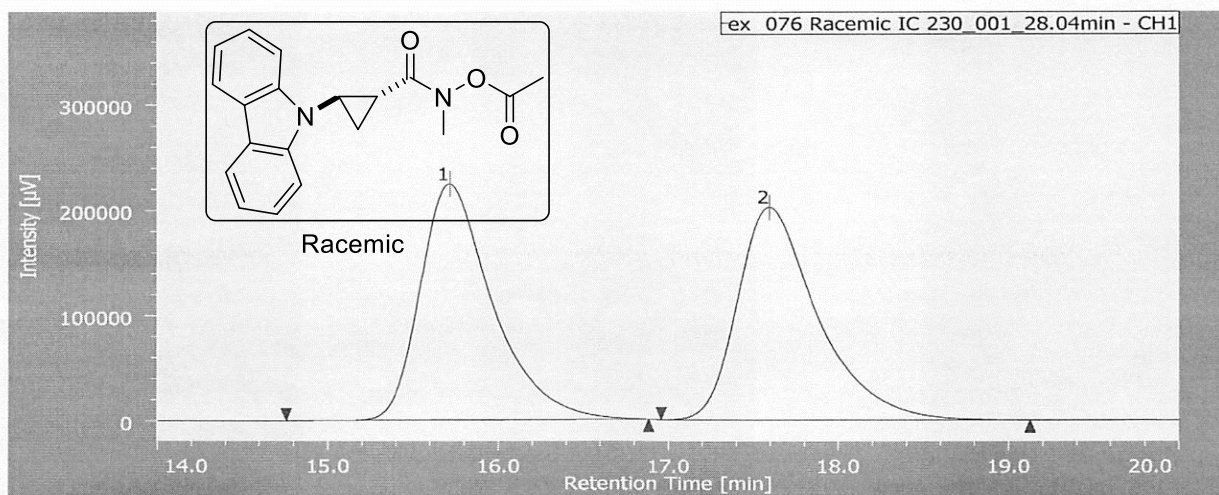

| No. | Time [min] | Area [μV-sec] | Area% |
|-----|------------|---------------|-------|
| 1   | 15.71      | 6599946       | 50.02 |
| 2   | 17.59      | 6593264       | 49.97 |

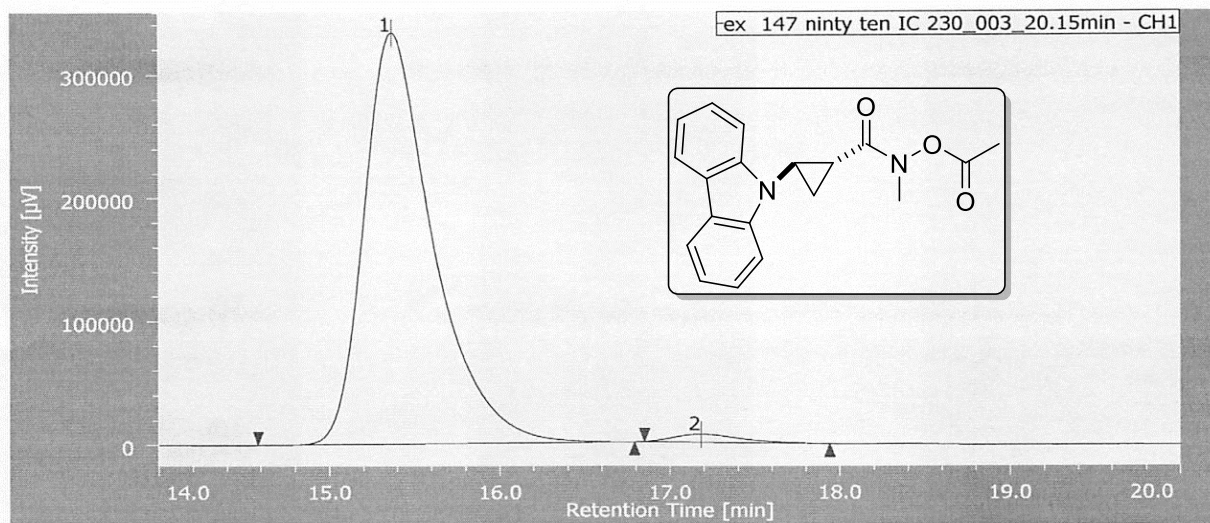

| No. | Time [min] | Area [μV-sec] | Area%  |
|-----|------------|---------------|--------|
| 1   | 15.36      | 9402883       | 98.071 |
| 2   | 17.18      | 178910        | 1.929  |



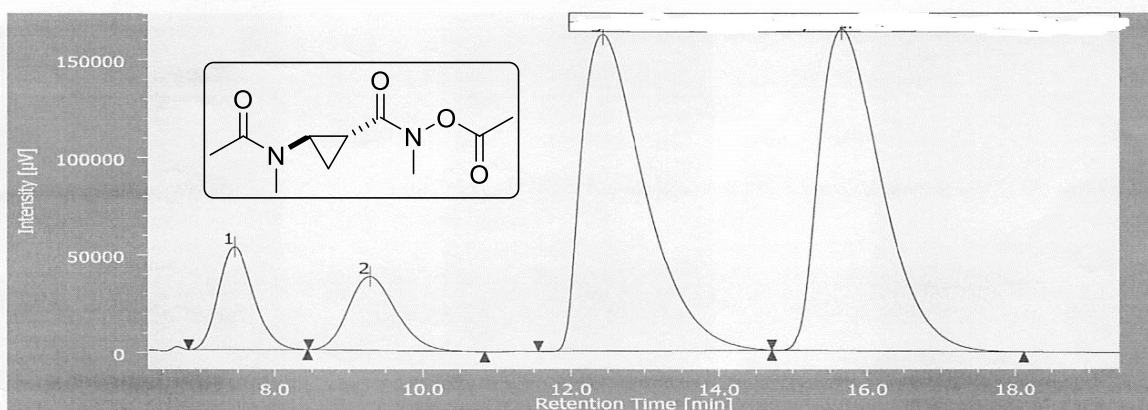

| No. | Time [min] | Area [μV-sec] | Area% |
|-----|------------|---------------|-------|
| 1   | 7.45       | 1730152       | 7.61  |
| 2   | 9.28       | 1704502       | 7.50  |
| 3   | 12.42      | 79623440      | 42.35 |
| 4   | 15.65      | 79662923      | 42.52 |

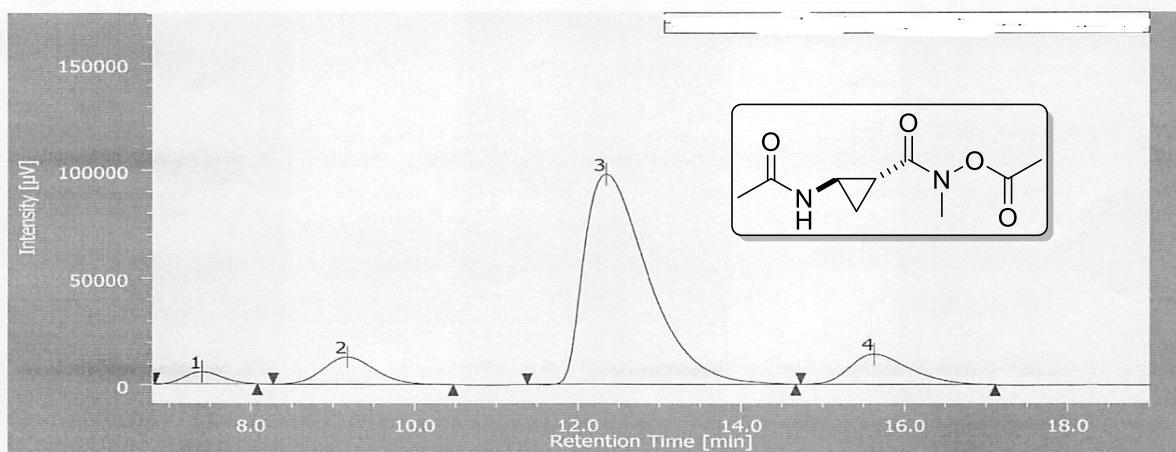

| No. | Time [min] | Area [μV-sec] | Area% |
|-----|------------|---------------|-------|
| 1   | 7.40       | 180900        | 2.84  |
| 2   | 9.17       | 568128        | 8.13  |
| 3   | 12.34      | 5355099       | 78.37 |
| 4   | 15.62      | 728703        | 10.66 |

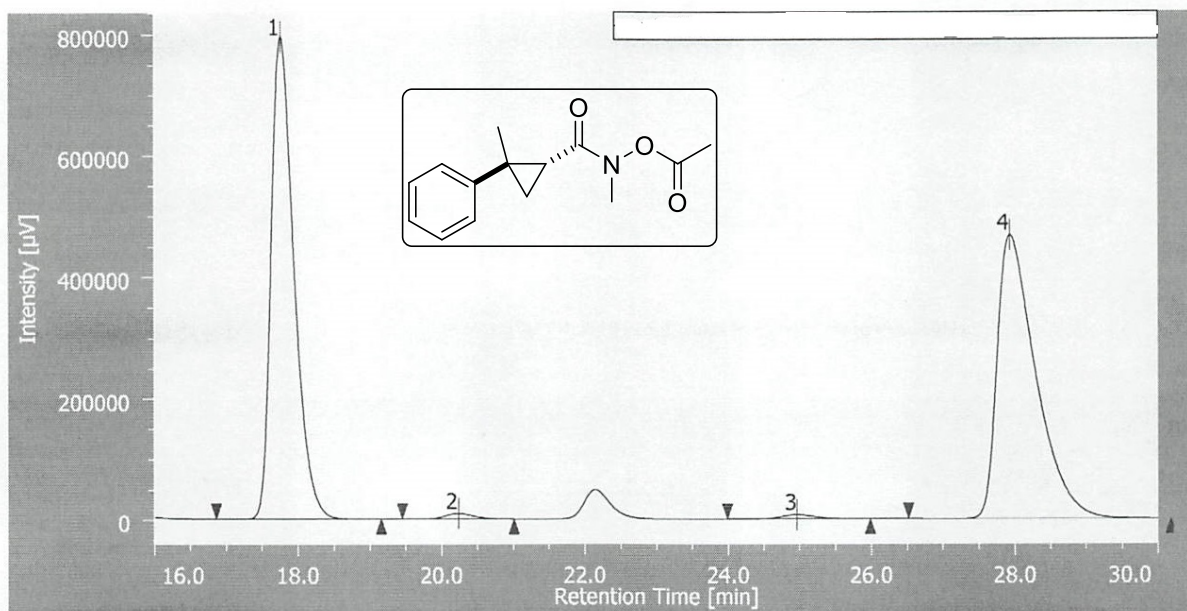

| No. | Time [min] | Area [μV-sec] | Area% |
|-----|------------|---------------|-------|
| 1   | 17.75      | 17411767      | 49.24 |
| 2   | 20.23      | 250234        | 0.70  |
| 3   | 24.95      | 225202        | 0.63  |
| 4   | 27.93      | 17467118      | 49.40 |

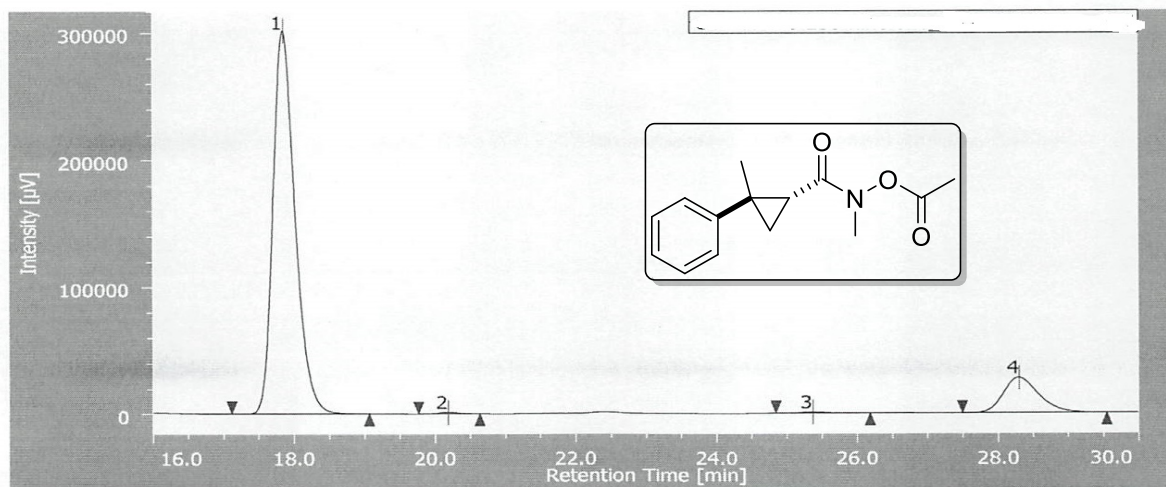

| No. | Time [min] | Area [μV-sec] | Area% |
|-----|------------|---------------|-------|
| 1   | 17.85      | 6469084       | 86.36 |
| 2   | 20.18      | 23208         | 0.13  |
| 3   | 25.36      | 23666         | 0.13  |
| 4   | 28.29      | 974233        | 13.00 |

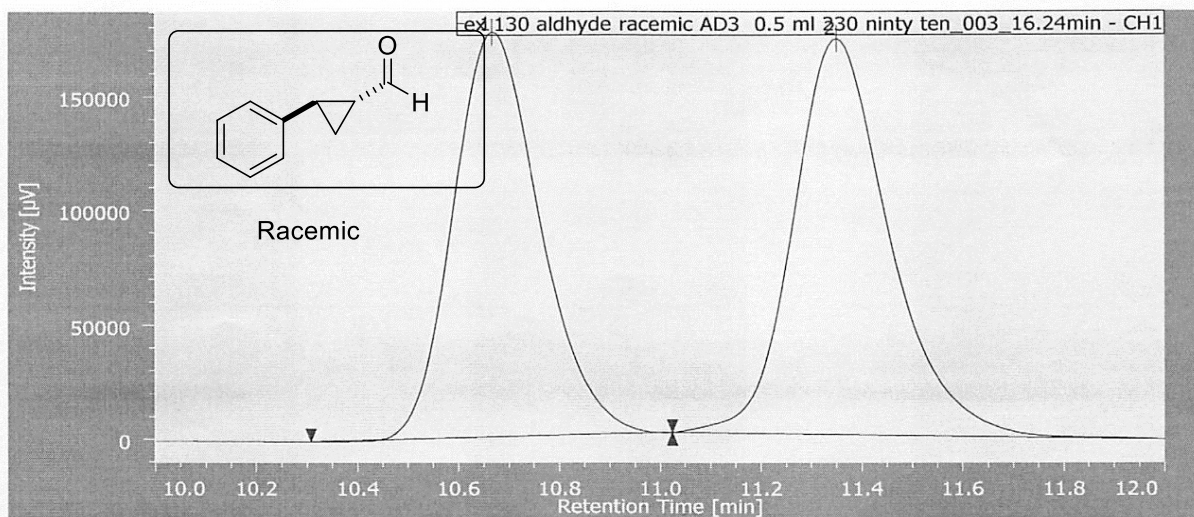

| No. | Time [min] | Area [µV-sec] | Area% |
|-----|------------|---------------|-------|
| 1   | 10.66      | 2106736       | 50.79 |
| 2   | 11.350     | 2287697       | 49.21 |

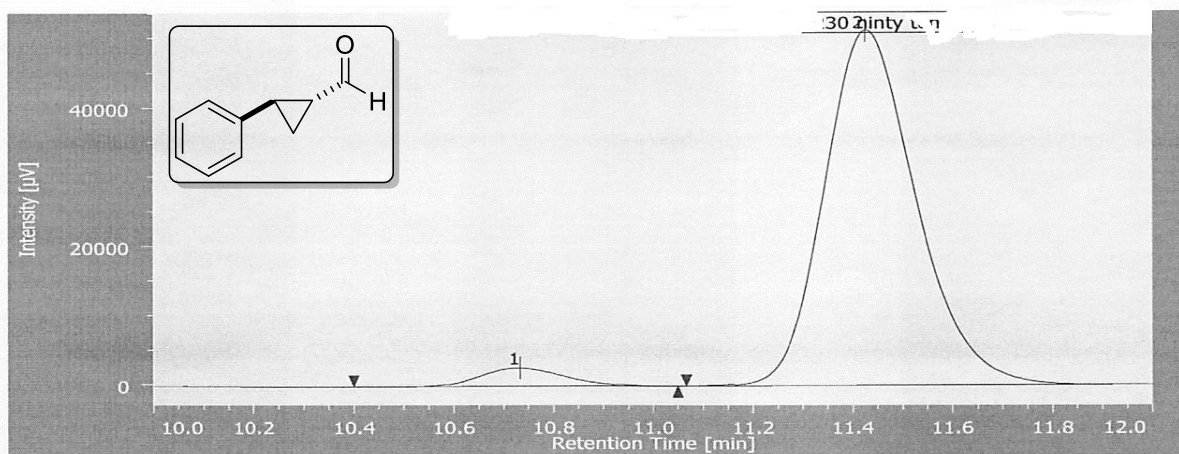

| No. | Time [min] | Area [µV-sec] | Area% |
|-----|------------|---------------|-------|
| 1   | 10.37      | 30751         | 4.511 |
| 2   | 11.42      | 650977        | 95.48 |



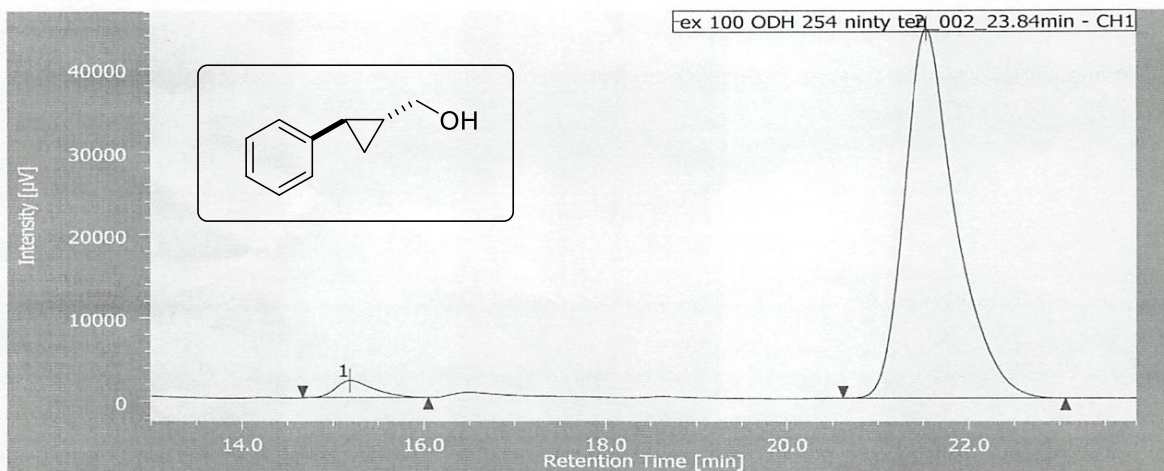

| No. | Time [min] | Area [μV-sec] | Area% |
|-----|------------|---------------|-------|
| 1   | 15.18      | 59811         | 3.36  |
| 2   | 21.53      | 1715954       | 96.63 |

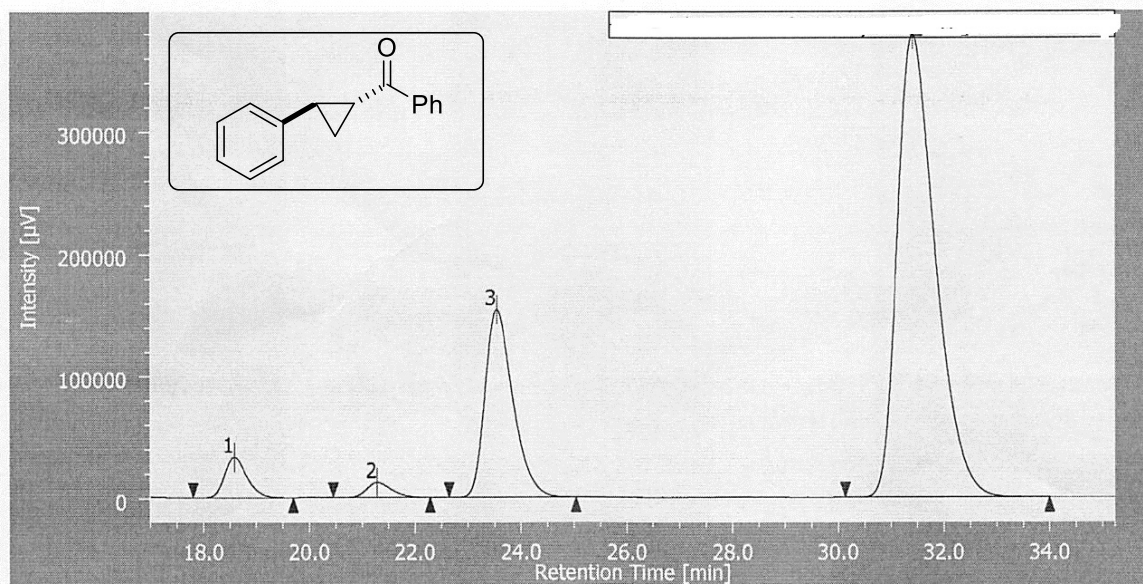

| No. | Time [min] | Area [μV-sec] | Area% |
|-----|------------|---------------|-------|
| 1   | 18.58      | 970661        | 3.74  |
| 2   | 21.28      | 396186        | 1.53  |
| 3   | 23.54      | 5681480       | 21.93 |
| 4   | 31.41      | 18848868      | 72.78 |

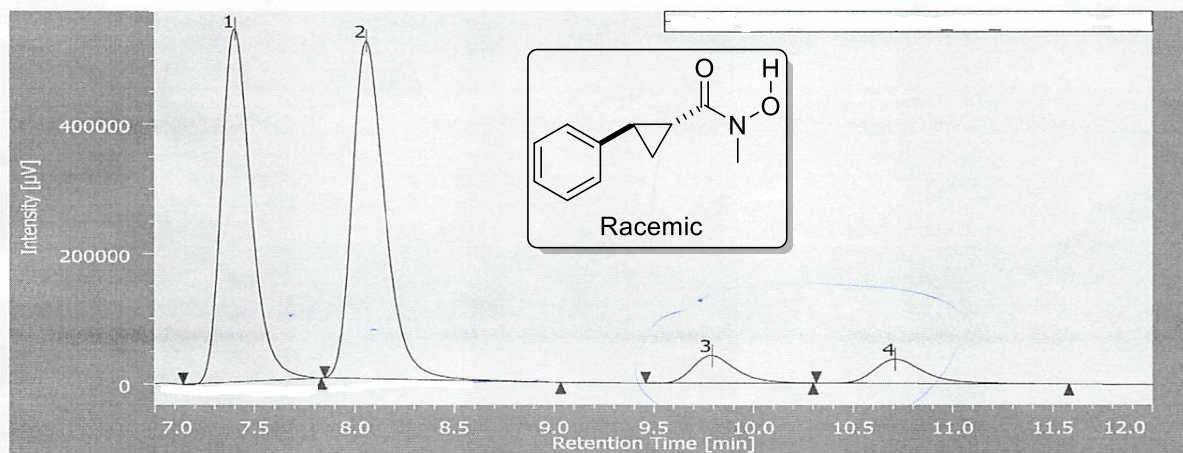

| No. | Time [min] | Area [μV-sec] | Area% |
|-----|------------|---------------|-------|
| 1   | 7.40       | 5623880       | 44.87 |
| 2   | 8.05       | 5952538       | 45.32 |
| 3   | 9.79       | 643097        | 5.000 |
| 4   | 10.70      | 642750        | 4.99  |

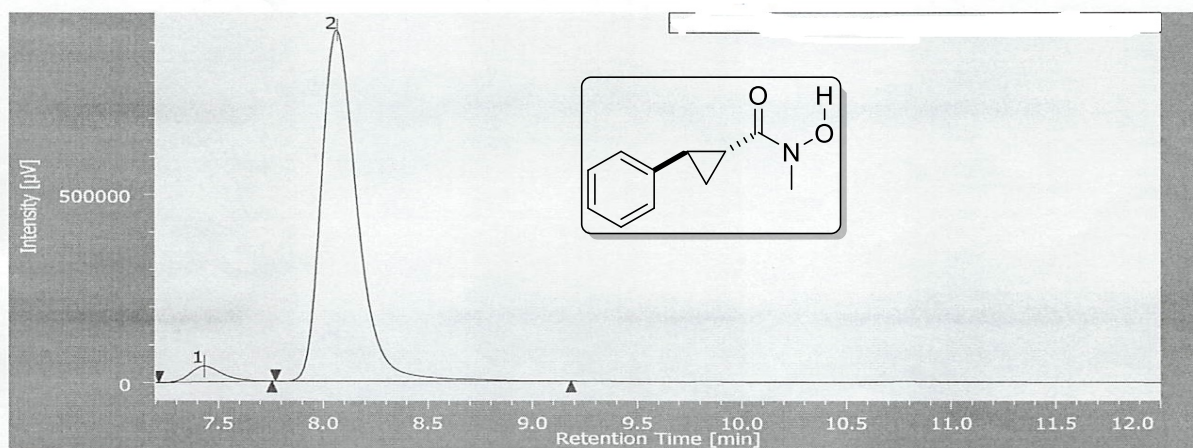

| No. | Time [min] | Area [μV-sec] | Area%  |
|-----|------------|---------------|--------|
| 1   | 7.43       | 442323        | 3.849  |
| 2   | 8.06       | 11050246      | 96.151 |
